# Supplementary material for: Mechanistic insight for tunable regioselective cyclization of aryl propiolates with radicals:ipso-versus ortho-cyclization
Source: Royal Society of Chemistry journal article supplement (doi:10.1039/d3nj02030d), 2023-01-01
Supplement: d3nj02030d1.pdf [file d3nj02030d1.pdf]

**Mechanistic insight for tunable regioselective cyclization of aryl propiolates with radicals: *ipso-* versus *ortho-*cyclization**

Meryem Fıstıkçı

*Department of Medical Services and Techniques, Vocational School of Health Services, Hakkari University, Hakkari, 30000, Türkiye*

## Table of contents

|                                                                                                                              |     |
|------------------------------------------------------------------------------------------------------------------------------|-----|
| <b>1. Computational Methods</b> .....                                                                                        | S3  |
| <b>2. The Optimized Geometries of The Transition States with Selected Interatomic Distances</b> .....                        | S5  |
| <b>Figure S1.</b> Computed structure of <b>TS1-3a</b> at the M062X/6-311G(d,p) level (im. freq.= 397 <i>i</i> ). .....       | S5  |
| <b>Figure S2.</b> Computed structure of <b>TS1-4a</b> at the M062X/6-311G(d,p) level (im. freq.= 463 <i>i</i> ). .....       | S5  |
| <b>Figure S3.</b> Computed structure of <b>TS3a-5a</b> at the M062X/6-311G(d,p) level (im. freq.= 424 <i>i</i> ). .....      | S5  |
| <b>Figure S4.</b> Computed structure of <b>TS3a-6a</b> at the M062X/6-311G(d,p) level (im. freq.= 404 <i>i</i> ). .....      | S5  |
| <b>Figure S5.</b> Computed structure of <b>TS5a-9a</b> at the M062X/6-311G(d,p) level (im. freq.= 262 <i>i</i> ). .....      | S6  |
| <b>Figure S6.</b> Computed structure of <b>TS9a-8a</b> at the M062X/6-311G(d,p) level (im. freq.= 321 <i>i</i> ). .....      | S6  |
| <b>Figure S7.</b> Computed structure of <b>TS9a-11a</b> at the M062X/6-311G(d,p) level (im. freq.= 482 <i>i</i> ). .....     | S6  |
| <b>Figure S8.</b> Computed structure of <b>TS11a-12a</b> at the M062X/6-311G(d,p) level (im. freq.= 387 <i>i</i> ). .....    | S7  |
| <b>Figure S9.</b> Computed structure of <b>TS7a-14a</b> at the B3LYP/6-311G(d,p) level (im. freq.= 233 <i>i</i> ). .....     | S7  |
| <b>Figure S10.</b> Computed structure of <b>TS1-3b</b> at the M062X/6-311G(d,p) level (im. freq.= 333 <i>i</i> ). .....      | S7  |
| <b>Figure S11.</b> Computed structure of <b>TS1-4b</b> at the M062X/6-311G(d,p) level (im. freq.= 379 <i>i</i> ). .....      | S7  |
| <b>Figure S12.</b> Computed structure of <b>TS3b-5b</b> at the M062X/6-311G(d,p) level (im. freq.= 405 <i>i</i> ). .....     | S8  |
| <b>Figure S13.</b> Computed structure of <b>TS3b-6b</b> at the M062X/6-311G(d,p) level (im. freq.= 399 <i>i</i> ). .....     | S8  |
| <b>Figure S14.</b> Computed structure of <b>TS5b-9b</b> at the M062X/6-311G(d,p) level (im. freq.= 272 <i>i</i> ). .....     | S8  |
| <b>Figure S15.</b> Computed structure of <b>TS9b-8b</b> at the M062X/6-311G(d,p) level (im. freq.= 328 <i>i</i> ). .....     | S8  |
| <b>Figure S16.</b> Computed structure of <b>TS9b-11b</b> at the M062X/6-311G(d,p) level (im. freq.= 424 <i>i</i> ). .....    | S9  |
| <b>Figure S17.</b> Computed structure of <b>TS11b-12b</b> at the M062X/6-311G(d,p) level (im. freq.= 409 <i>i</i> ). .....   | S9  |
| <b>Figure S18.</b> Computed structure of <b>TS1-3c</b> at the M062X/6-311G(d,p) level (im. freq.= 429 <i>i</i> ). .....      | S9  |
| <b>Figure S19.</b> Computed structure of <b>TS1-4c</b> at the M062X/6-311G(d,p) level (im. freq.= 398 <i>i</i> ). .....      | S9  |
| <b>Figure S20.</b> Computed structure of <b>TS3c-5c</b> at the M062X/6-311G(d,p) level (im. freq.= 413 <i>i</i> ). .....     | S10 |
| <b>Figure S21.</b> Computed structure of <b>TS3c-6c</b> at the M062X/6-311G(d,p) level (im. freq.= 418 <i>i</i> ). .....     | S10 |
| <b>Figure S22.</b> Computed structure of <b>TS5c-9c</b> at the M062X/6-311G(d,p) level (im. freq.= 228 <i>i</i> ). .....     | S10 |
| <b>Figure S23.</b> Computed structure of <b>TS9c-8c</b> at the M062X/6-311G(d,p) level (im. freq.= 329 <i>i</i> ). .....     | S11 |
| <b>Figure S24.</b> Computed structure of <b>TS9c-11c</b> at the M062X/6-311G(d,p) level (im. freq.= 353 <i>i</i> ). .....    | S11 |
| <b>Figure S25.</b> Computed structure of <b>TS11c-12c</b> at the M062X/6-311G(d,p) level (im. freq.= 412 <i>i</i> ). .....   | S11 |
| <b>Figure S26.</b> Computed structure of <b>TS11c-12cH</b> at the M062X/6-311G(d,p) level (im. freq.= 1415 <i>i</i> ). ..... | S12 |
| <b>3. Single Point Energy Computations</b> .....                                                                             | S13 |
| <b>Table S1.</b> Single point energies ( <b>E</b> ) for <b>a</b> using the DLPNO-CCSD(T)-cc-PVTZ level in a.u.....           | S13 |
| <b>Table S2.</b> Single point energies ( <b>E</b> ) for <b>b</b> using the DLPNO-CCSD(T)-cc-PVTZ level in a.u. ....          | S13 |
| <b>Table S3.</b> Single point energies $\epsilon$ for <b>c</b> using the DLPNO-CCSD(T)-cc-PVTZ level in a.u. ....            | S14 |
| <b>4. Cartesian coordinates for optimized structures</b> .....                                                               | S15 |

## 1. Computational Methods

Geometry optimizations and harmonic vibrational frequency computations for the structures considered were carried out with DFT, the M062X hybrid functional.<sup>1</sup> For this purpose, a Pople-type polarized triple- $\zeta$  split-valence basis sets, 6-311G(d,p), was used.<sup>2-4</sup> Single point energies were computed at the optimized geometries with the coupled-cluster singles and doubles with perturbative triples method employing the domain based local pair natural orbitals approach [DLPNO-CCSD(T)].<sup>5,6</sup> In DLPNO-CCSD(T) computations Dunning's correlation consistent triple- $\zeta$  split valence basis set, cc-pVTZ, is employed.<sup>7,8</sup> DFT computations were carried out by using the Gaussian 16 program,<sup>9</sup> while the ORCA package<sup>10,11</sup> (ORCA 4.2.1) is employed for DLPNO-CCSD(T) computations. For the TS between species A and B, the TSA-B notation is used throughout the article.

## References

- 1 Y. Zhao and D. G. Truhlar, The M06 Suite of Density Functionals for Main Group Thermochemistry, Thermochemical Kinetics, Noncovalent Interactions, Excited States, and Transition Elements: Two New Functionals and Systematic Testing of Four M06-Class Functionals and 12 Other Functionals, *Theor. Chem. Acc.*, 2008, **120**, 215–241.
- 2 P. C. Hariharan and J. A. Pople, The Influence of Polarization Functions on Molecular Orbital Hydrogenation Energies, *Theor. Chim. Acta*, 1973, **28**, 213-222.
- 3 R. Krishnan, J. S. Binkley, R. Seeger and J. A. Pople, Self-Consistent Molecular Orbital Methods. XX. A Basis Set for Correlated Wave Functions, *J. Chem. Phys.*, 1980, **72**, 650-654.
- 4 A. D. McLean and G. S. Chandler, Contracted Gaussian Basis Sets for Molecular Calculations. I. Second Row Atoms Z=11-18, *J. Chem. Phys.*, 1980, **72**, 5639-5648.
- 5 C. Riplinger, B. Sandhoefer, A. Hansen and F. Neese, Natural Triple Excitations in Local Coupled Cluster Calculations with Pair Natural Orbitals, *J. Chem. Phys.*, 2013, **139**, 134101.

- 6 Y. Guo, C. Riplinger, U. Becker, D. G. Liakos, Y. Minenkov, L. Cavallo and F. Neese, Communication: An Improved Linear Scaling Perturbative Triples Correction for the Domain Based Local Pair-Natural Orbital Based Singles and Doubles Coupled Cluster Method [DLPNO-CCSD(T)], *J. Chem. Phys.*, 2018, **148**, 011101.
- 7 T. H. Dunning, Gaussian Basis Sets for Use in Correlated Molecular Calculations. I. The Atoms Boron Through Neon and Hydrogen, *J. Chem. Phys.*, 1989, **90**, 1007-1023.
- 8 D. E. Woon and T. H. Dunning, Gaussian Basis Sets for Use in Correlated Molecular Calculations. V. Core-Valence Basis Sets for Boron Through Neon, *J. Chem. Phys.*, 1995, **103**, 4572-4585.
- 9 M. J. Frisch, G. W. Trucks, H. B. Schlegel, G. E. Scuseria, M. A. Robb, J. R. Cheeseman, G. Scalmani, V. Barone, G. A. Petersson, H. Nakatsuji, X. Li, M. Caricato, A. V. Marenich, J. Bloino, B. G. Janesko, R. Gomperts, B. Mennucci, H. P. Hratchian, Ortiz, A. F. Izmaylov, J. L. Sonnenberg, D. Williams-Young, F. Ding, F. Lipparini, F. Egidi, J. Goings, B. Peng, A. Petrone, T. Henderson, D. Ranasinghe, V. G. Zakrzewski, J. Gao, N. Rega, G. Zheng, W. Liang, M. Hada, M. Ehara, K. Toyota, R. Fukuda, J. Hasegawa, M. Ishida, T. Nakajima, Y. Honda, O. Kitao, H. Nakai, T. Vreven, K. Throssell, J. A. Jr. Montgomery, J. E. Peralta, F. Ogliaro, M. Bearpark, J. J. Heyd, E. N. Brothers, K. N. Kudin, V. N. Staroverov, T. A. Keith, Kobayashi, J. Normand, K. Raghavachari, A. P. Rendell, J. C. Burant, S. S. Iyengar, J. Tomasi, M. Cossi, J. M. Millam, M. Klene, C. Adamo, R. Cammi, J. W. Ochterski, R. L. Martin, K. Morokuma, O. Farkas, J. B. Foresman and D. J. Fox, *Gaussian 16, Revision C.01*: Gaussian, Inc., Wallingford, CT, 2019.
- 10 F. Neese, The ORCA program system, *Wiley Interdiscip. Rev.: Comput. Mol. Sci.*, 2012, **2**, 73-78.
- 11 F. Neese, F. Software update: The ORCA program system, version 4.0, *Wiley Interdiscip. Rev.: Comput. Mol. Sci.*, 2018, **8**, e1327.

## 2. The Optimized Geometries of The Transition States with Selected Interatomic Distances

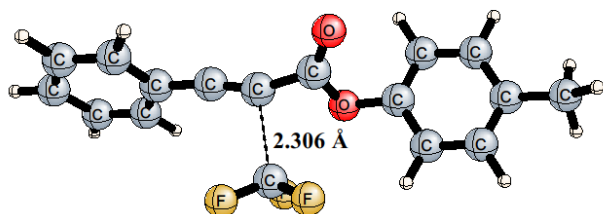

Figure S1. Computed structure of TS1-3a at the M062X/6-311G(d,p) level (im. freq.= 397*i*).

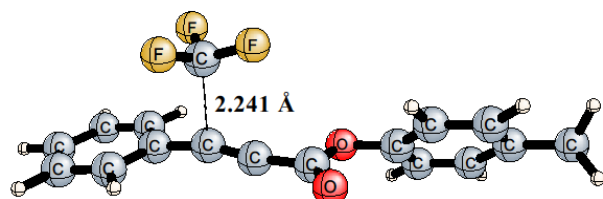

Figure S2. Computed structure of TS1-4a at the M062X/6-311G(d,p) level (im. freq.= 463*i*).

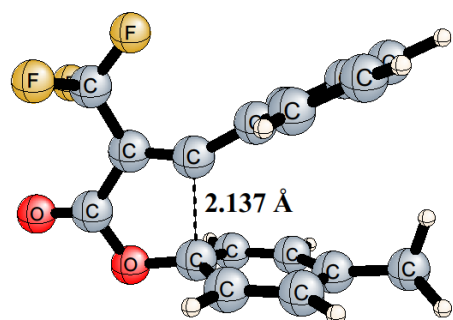

Figure S3. Computed structure of TS3a-5a at the M062X/6-311G(d,p) level (im. freq.= 424*i*).

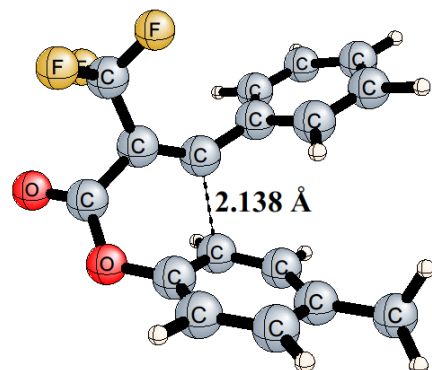

Figure S4. Computed structure of TS3a-6a at the M062X/6-311G(d,p) level (im. freq.= 404*i*).

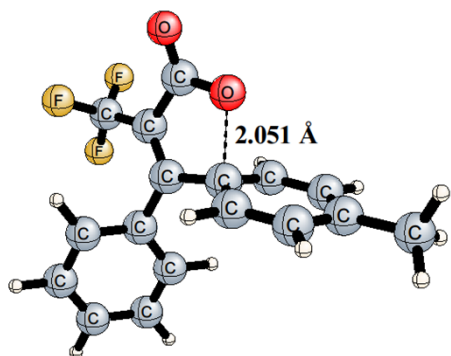

**Figure S5.** Computed structure of **TS5a-9a** at the M062X/6-311G(d,p) level (im. freq.= 262*i*).

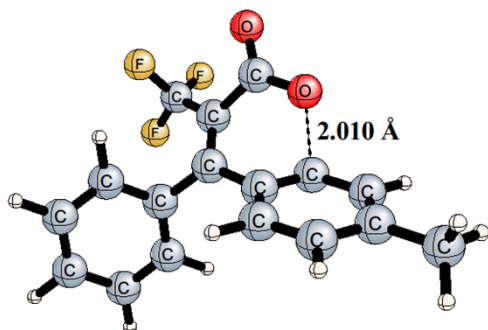

**Figure S6.** Computed structure of **TS9a-8a** at the M062X/6-311G(d,p) level (im. freq.= 321*i*).

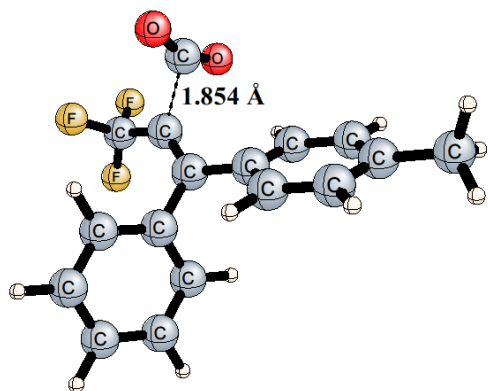

**Figure S7.** Computed structure of **TS9a-11a** at the M062X/6-311G(d,p) level (im. freq.= 482*i*).

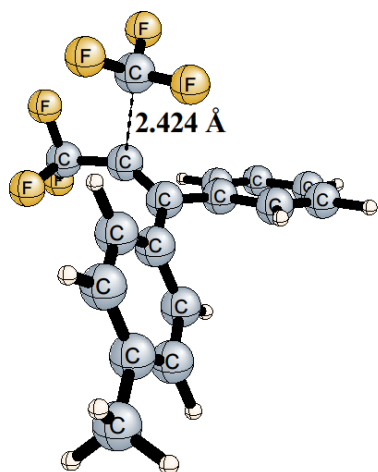

**Figure S8.** Computed structure of **TS11a-12a** at the M062X/6-311G(d,p) level (im. freq.= 387*i*).

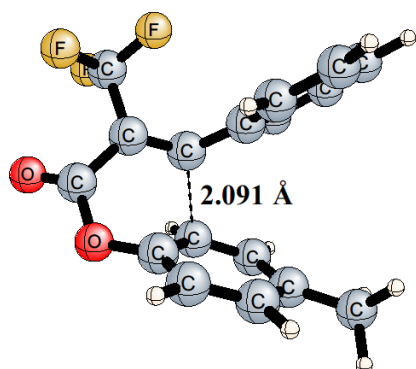

**Figure S9.** Computed structure of **TS7a-14a** at the B3LYP/6-311G(d,p) level (im. freq.= 233*i*).

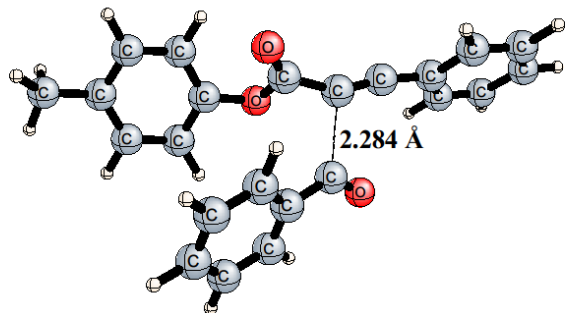

**Figure S10.** Computed structure of **TS1-3b** at the M062X/6-311G(d,p) level (im. freq.= 333*i*).

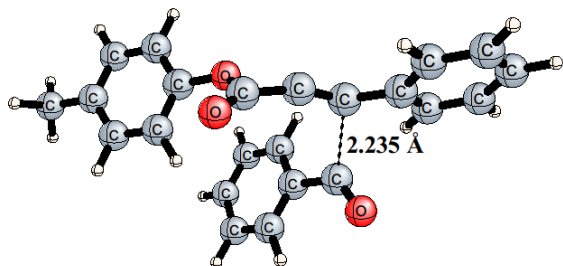

**Figure S11.** Computed structure of **TS1-4b** at the M062X/6-311G(d,p) level (im. freq.= 379*i*).

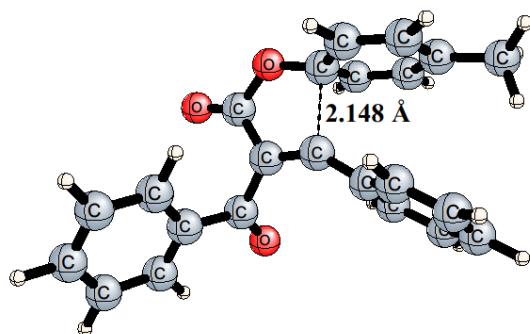

**Figure S12.** Computed structure of TS3b-5b at the M062X/6-311G(d,p) level (im. freq.= 405*i*).

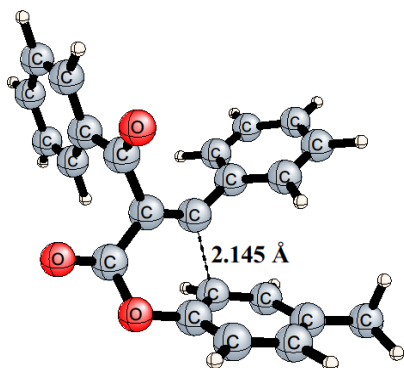

**Figure S13.** Computed structure of TS3b-6b at the M062X/6-311G(d,p) level (im. freq.= 399*i*).

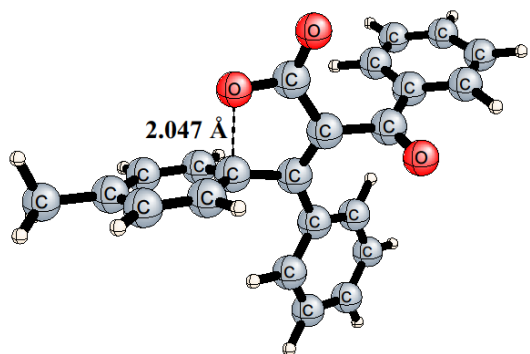

**Figure S14.** Computed structure of TS5b-9b at the M062X/6-311G(d,p) level (im. freq.= 272*i*).

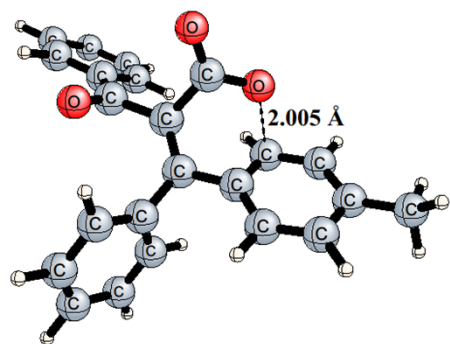

**Figure S15.** Computed structure of TS9b-8b at the M062X/6-311G(d,p) level (im. freq.= 328*i*).



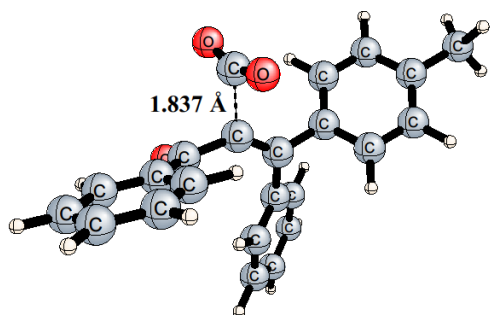

**Figure S16.** Computed structure of TS9b-11b at the M062X/6-311G(d,p) level (im. freq.= 424*i*).

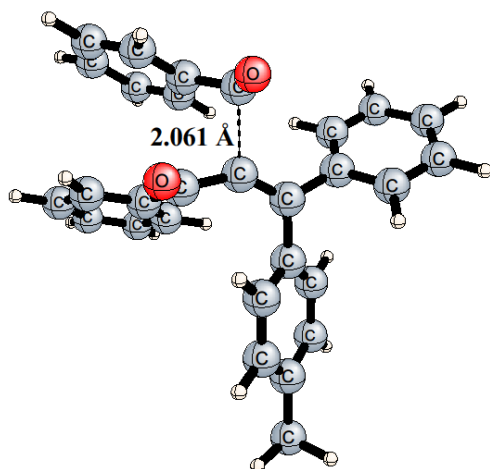

**Figure S17.** Computed structure of TS11b-12b at the M062X/6-311G(d,p) level (im. freq.= 409*i*).

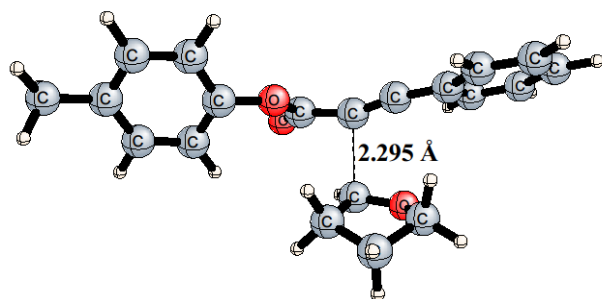

**Figure S18.** Computed structure of TS1-3c at the M062X/6-311G(d,p) level (im. freq.= 429*i*).

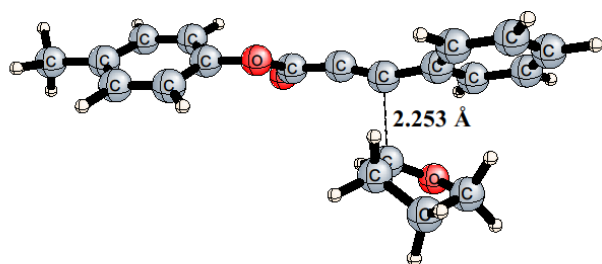

**Figure S19.** Computed structure of TS1-4c at the M062X/6-311G(d,p) level (im. freq.= 398*i*).

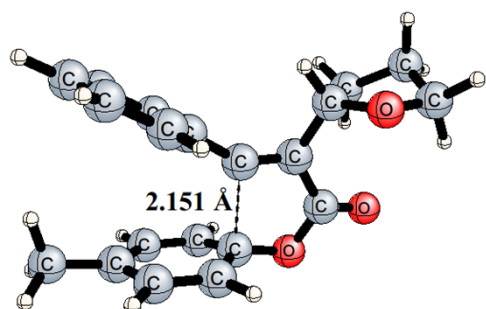

**Figure S20.** Computed structure of TS3c-5c at the M062X/6-311G(d,p) level (im. freq.= 413*i*).

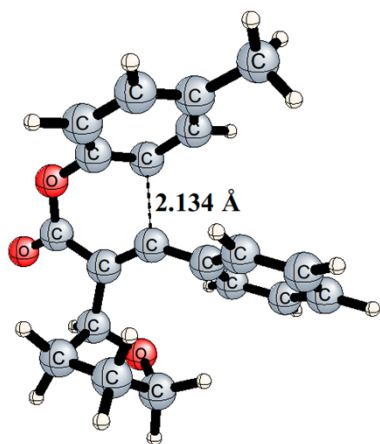

**Figure S21.** Computed structure of TS3c-6c at the M062X/6-311G(d,p) level (im. freq.= 418*i*).

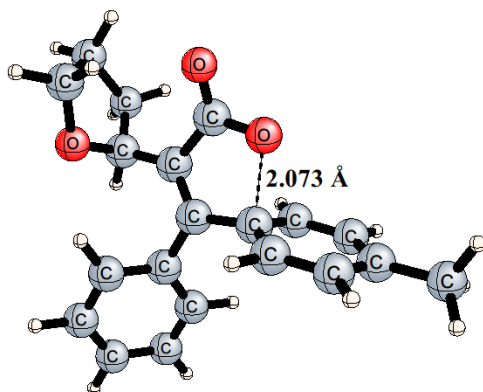

**Figure S22.** Computed structure of TS5c-9c at the M062X/6-311G(d,p) level (im. freq.= 228*i*).

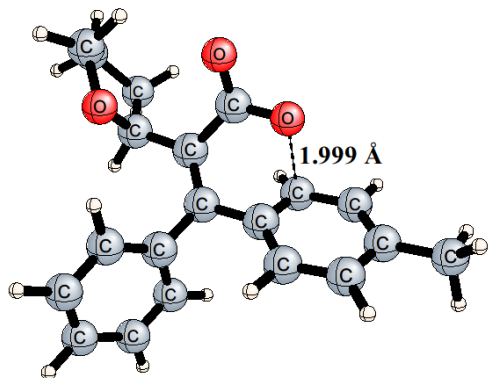

**Figure S23.** Computed structure of TS9c-8c at the M062X/6-311G(d,p) level (im. freq.= 329i).

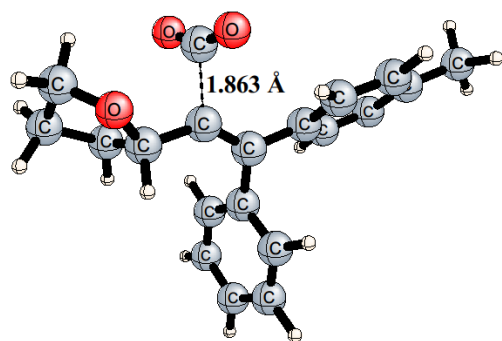

**Figure S24.** Computed structure of TS9c-11c at the M062X/6-311G(d,p) level (im. freq.= 353i).

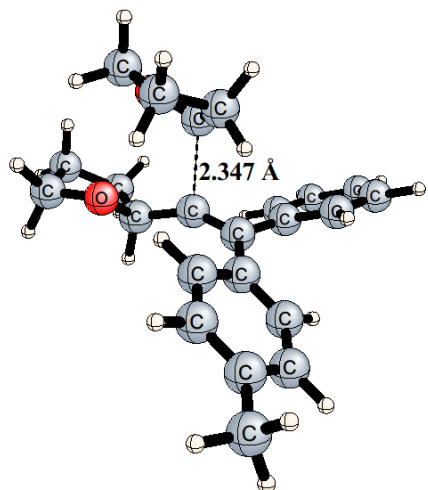

**Figure S25.** Computed structure of TS11c-12c at the M062X/6-311G(d,p) level (im. freq.= 412i).

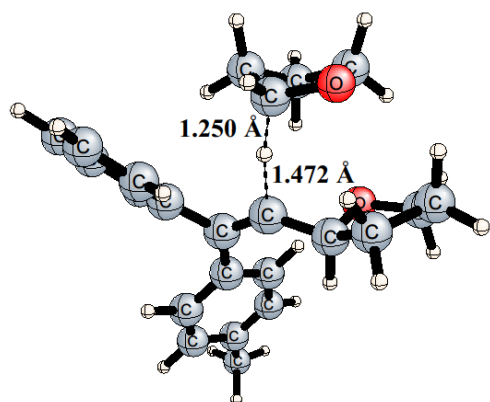

**Figure S26.** Computed structure of TS11c-12cH at the M062X/6-311G(d,p) level (im. freq.= 1415*i*).

### 3. Single Point Energy Computations

**Table S1.** Single point energies (**E**) for **a** using the DLPNO-CCSD(T)-cc-pVTZ level in a.u.

| <b>Molecule</b> | <b>E</b>       | <b>TS</b>        | <b>E</b>       |
|-----------------|----------------|------------------|----------------|
| <b>1</b>        | -765.95425755  | <b>TS1-3a</b>    | -1103.12062435 |
| <b>2a</b>       | -337.17035515  | <b>TS1-4a</b>    | -1103.11723243 |
| <b>3a</b>       | -1103.18961222 | <b>TS3a-5a</b>   | -1103.18567376 |
| <b>4a</b>       | -1103.17662619 | <b>TS3a-6a</b>   | -1103.17447032 |
| <b>5a</b>       | -1103.21939893 | <b>TS5a-9a</b>   | -1103.19163888 |
| <b>6a</b>       | -1103.21001154 | <b>TS9a-8a</b>   | -1103.19063190 |
| <b>7a</b>       | -1102.92605614 | <b>TS9a-11a</b>  | -1103.18194983 |
| <b>8a</b>       | -1103.22117209 | <b>TS11a-12a</b> | -1252.05127891 |
| <b>9a</b>       | -1103.19272609 |                  |                |
| <b>10a</b>      | -1102.68026861 |                  |                |
| <b>11a</b>      | -914.88472385  |                  |                |
| <b>12a</b>      | -1252.22263114 |                  |                |
| <b>13a</b>      | -1102.67956561 |                  |                |
| <b>14a</b>      | -1102.96821178 |                  |                |
| <b>15a</b>      | -1102.96010707 |                  |                |
| <b>16a</b>      | -1102.95092174 |                  |                |
| <b>CO2</b>      | -188.32453962  |                  |                |

**Table S2.** Single point energies (**E**) for **b** using the DLPNO-CCSD(T)-cc-pVTZ level in a.u.

| <b>Molecule</b> | <b>E</b>       | <b>TS</b>       | <b>E</b>       |
|-----------------|----------------|-----------------|----------------|
| <b>2b</b>       | -344.30572322  | <b>TS1-3b</b>   | -1110.25699120 |
| <b>3b</b>       | -1110.30617366 | <b>TS1-4b</b>   | -1110.25626546 |
| <b>4b</b>       | -1110.29730083 | <b>TS3b-5b</b>  | -1110.30081785 |
| <b>5b</b>       | -1110.33829763 | <b>TS3b-6b</b>  | -1110.29170638 |
| <b>6b</b>       | -1110.32913690 | <b>TS5b-9b</b>  | -1110.31222535 |
| <b>7b</b>       | -1110.06034388 | <b>TS9b-8b</b>  | -1110.30894120 |
| <b>8b</b>       | -1110.34051651 | <b>TS9b-11b</b> | -1110.30717132 |

|            |                |                  |                |
|------------|----------------|------------------|----------------|
| <b>9b</b>  | -1110.31316530 | <b>TS11b-12b</b> | -1266.31113053 |
| <b>10b</b> | -1109.80207696 |                  |                |
| <b>11b</b> | -922.01011261  |                  |                |
| <b>12b</b> | -1266.46470640 |                  |                |
| <b>13b</b> | -1109.80148844 |                  |                |
| <b>14b</b> | -1110.09674965 |                  |                |
| <b>15b</b> | -1110.08616011 |                  |                |
| <b>16b</b> | -1110.08351776 |                  |                |
| <b>CO2</b> | -188.32453962  |                  |                |

**Table S3.** Single point energies (**E**) for **c** using the DLPNO-CCSD(T)-cc-pVTZ level in a.u.

| <b>Molecule</b> | <b>E</b>       | <b>TS</b>         | <b>E</b>       |
|-----------------|----------------|-------------------|----------------|
| <b>THF</b>      | -232.05603882  | <b>TS1-3c</b>     | -997.35166529  |
| <b>2c</b>       | -231.39708069  | <b>TS1-4c</b>     | -997.34774319  |
| <b>3c</b>       | -997.40392598  | <b>TS3c-5c</b>    | -997.40137400  |
| <b>4c</b>       | -997.38930994  | <b>TS3c-6c</b>    | -997.39423058  |
| <b>5c</b>       | -997.43942075  | <b>TS5c-9c</b>    | -997.41113050  |
| <b>6c</b>       | -997.42801475  | <b>TS9c-8c</b>    | -997.40968193  |
| <b>7c</b>       | -997.16583508  | <b>TS9c-11c</b>   | -997.40254764  |
| <b>8c</b>       | -997.44026685  | <b>TS11c-12c</b>  | -1040.49727774 |
| <b>9c</b>       | -997.41178655  | <b>TS11c-12cH</b> | -1041.15613999 |
| <b>10c</b>      | -996.89899008  |                   |                |
| <b>11c</b>      | -809.09799820  |                   |                |
| <b>12c</b>      | -1040.65280781 |                   |                |
| <b>12cH</b>     | -809.78142848  |                   |                |
| <b>13c</b>      | -996.89954540  |                   |                |
| <b>14c</b>      | -997.20148466  |                   |                |
| <b>15c</b>      | -997.19264944  |                   |                |
| <b>16c</b>      | -997.18732570  |                   |                |
| <b>CO2</b>      | -188.32453962  |                   |                |

#### 4. Cartesian coordinates for optimized structures

##### THF

E= -232.4023563 a.u., number of negative frequencies = 0

0 1

|   |             |             |             |
|---|-------------|-------------|-------------|
| C | -0.72692500 | 0.98961000  | -0.23878100 |
| C | -1.15889500 | -0.42667000 | 0.13780200  |
| O | -0.00002400 | -1.24334000 | 0.00000100  |
| C | 0.72696300  | 0.98958400  | 0.23878400  |
| H | -0.76577200 | 1.12356000  | -1.32289100 |
| H | -1.34157400 | 1.75845200  | 0.22943700  |
| H | -1.50715800 | -0.46314900 | 1.17692300  |
| H | -1.94612000 | -0.82284600 | -0.50626500 |
| H | 0.76582900  | 1.12354800  | 1.32289100  |
| H | 1.34163100  | 1.75840200  | -0.22945200 |
| C | 1.15887900  | -0.42671100 | -0.13780200 |
| H | 1.94608700  | -0.82292600 | 0.50626200  |
| H | 1.50713500  | -0.46320300 | -1.17692500 |

##### 1

E= -767.1963133 a.u., number of negative frequencies = 0

0 1

|   |             |             |             |
|---|-------------|-------------|-------------|
| C | -2.28936200 | -0.27295600 | -0.05680900 |
| C | -1.10608300 | -0.48965400 | -0.09900900 |
| C | 0.30297800  | -0.81758700 | -0.17434600 |
| O | 1.04503600  | 0.27850400  | 0.10358800  |
| O | 0.73414900  | -1.89841500 | -0.44405100 |
| C | -3.69418600 | -0.01360000 | -0.00316800 |
| C | -4.16128100 | 1.25634300  | 0.35511300  |
| C | -5.52549800 | 1.50208600  | 0.40641700  |
| C | -6.42966100 | 0.48887400  | 0.10157400  |

|   |             |             |             |
|---|-------------|-------------|-------------|
| C | -5.96914600 | -0.77494000 | -0.25560000 |
| C | -4.60670900 | -1.03013600 | -0.30881500 |
| C | 2.43577500  | 0.20324100  | 0.07121100  |
| C | 3.08819500  | 1.25042800  | -0.55853800 |
| C | 4.47709400  | 1.28240000  | -0.56504200 |
| C | 5.22223100  | 0.27684200  | 0.04794800  |
| C | 4.53478500  | -0.76078600 | 0.67925300  |
| C | 3.14740200  | -0.80972200 | 0.69958900  |
| H | -3.44696800 | 2.03553800  | 0.58986000  |
| H | -5.88469300 | 2.48523500  | 0.68452600  |
| H | -7.49438300 | 0.68440600  | 0.14259100  |
| H | -6.67332500 | -1.56286000 | -0.49273200 |
| H | -4.23477500 | -2.00890400 | -0.58479000 |
| H | 2.49958400  | 2.02901100  | -1.02712500 |
| H | 4.98762300  | 2.10409400  | -1.05522900 |
| H | 5.09591000  | -1.54999200 | 1.16813900  |
| H | 2.62768400  | -1.62296100 | 1.18593500  |
| C | 6.72858800  | 0.29127500  | 0.01237000  |
| H | 7.14761700  | -0.06793800 | 0.95384500  |
| H | 7.10262300  | -0.35629300 | -0.78524700 |
| H | 7.10888600  | 1.29730000  | -0.16894600 |

### 2a

E= -337.5471385 a.u., number of negative frequencies = 0

0 2

|   |             |             |             |
|---|-------------|-------------|-------------|
| C | 0.00000000  | 0.00000000  | 0.32844300  |
| F | 0.00000000  | 1.25099500  | -0.07298700 |
| F | -1.08339300 | -0.62549700 | -0.07298700 |
| F | 1.08339300  | -0.62549700 | -0.07298700 |

### 3a



E= -1104.8126421 a.u., number of negative frequencies = 0

0 2

|   |             |             |             |
|---|-------------|-------------|-------------|
| C | -1.05214100 | 1.03104100  | -0.04781500 |
| C | 0.06379600  | 0.02120100  | -0.02300700 |
| O | -0.09972500 | -1.15369700 | 0.10754600  |
| O | 1.24730000  | 0.64451700  | -0.16782400 |
| C | -0.72195000 | 2.50505200  | -0.09589100 |
| C | -2.29391200 | 0.61811400  | -0.01545900 |
| C | 2.45344000  | -0.04889000 | -0.09345700 |
| C | 3.47581500  | 0.61233500  | 0.57096900  |
| C | 4.72992800  | 0.02439400  | 0.64286300  |
| C | 4.97707700  | -1.21794300 | 0.05666900  |
| C | 3.92812000  | -1.85380000 | -0.60480900 |
| C | 2.66312000  | -1.28237200 | -0.69141200 |
| C | -3.24158200 | -0.40453300 | 0.04054100  |
| C | -3.67291200 | -0.90773900 | 1.28913800  |
| C | -4.63360400 | -1.89975500 | 1.33669600  |
| C | -5.18821800 | -2.40386500 | 0.16022300  |
| C | -4.77307300 | -1.90867800 | -1.07587600 |
| C | -3.81501100 | -0.91516700 | -1.14610600 |
| H | 3.26880200  | 1.57640600  | 1.01855700  |
| H | 5.52957600  | 0.53882200  | 1.16475800  |
| H | 4.09794800  | -2.82146600 | -1.06420100 |
| H | 1.85711600  | -1.79283300 | -1.19741300 |
| H | -3.23228000 | -0.51475300 | 2.19646800  |
| H | -4.95318900 | -2.28873300 | 2.29564800  |
| H | -5.94088600 | -3.18097300 | 0.20664800  |
| H | -5.20198800 | -2.30329500 | -1.98876100 |
| H | -3.48785900 | -0.52413100 | -2.10118800 |
| F | 0.04427600  | 2.87265800  | 0.93848600  |
| F | -1.83274500 | 3.24598900  | -0.04948300 |

|   |             |             |             |
|---|-------------|-------------|-------------|
| F | -0.07046900 | 2.83444900  | -1.21494600 |
| C | 6.34947700  | -1.83748300 | 0.11453900  |
| H | 6.98874100  | -1.43582300 | -0.67638400 |
| H | 6.83457300  | -1.62990300 | 1.06971400  |
| H | 6.29907900  | -2.91923100 | -0.01496500 |

#### 4a

E= -1104.8020464 a.u., number of negative frequencies = 0

0 2

|   |             |             |             |
|---|-------------|-------------|-------------|
| C | 0.75153700  | -0.95710600 | -0.34666600 |
| C | -0.56633200 | -0.42654500 | -0.64758600 |
| O | -0.82203100 | 0.21779400  | -1.62770300 |
| O | -1.44400300 | -0.79833500 | 0.30354600  |
| C | -2.77955800 | -0.40255600 | 0.21638000  |
| C | -3.35323000 | 0.06683000  | 1.38599300  |
| C | -4.69952200 | 0.40923500  | 1.39122400  |
| C | -5.47653200 | 0.29037600  | 0.24013900  |
| C | -4.86836300 | -0.19272000 | -0.91943700 |
| C | -3.52502900 | -0.54272000 | -0.94567700 |
| C | 2.57377000  | 0.69610800  | -0.03635700 |
| C | 3.62867400  | 0.99259900  | 0.83146600  |
| C | 4.12633800  | 2.28720300  | 0.90084000  |
| C | 3.58232700  | 3.29219500  | 0.10891700  |
| C | 2.53797700  | 2.99784600  | -0.76093100 |
| C | 2.03504600  | 1.70626500  | -0.83828500 |
| H | -2.74192100 | 0.14868700  | 2.27578400  |
| H | -5.15148300 | 0.77333000  | 2.30721100  |
| H | -5.45732600 | -0.29977800 | -1.82393000 |
| H | -3.06492700 | -0.91086900 | -1.85183500 |
| H | 4.05600100  | 0.21996200  | 1.45721300  |
| H | 4.94247600  | 2.50925500  | 1.57744400  |

|   |             |             |             |
|---|-------------|-------------|-------------|
| H | 3.97535700  | 4.30009000  | 0.16493400  |
| H | 2.11739600  | 3.77326600  | -1.38935600 |
| H | 1.23630000  | 1.47186400  | -1.53195900 |
| C | -6.92830500 | 0.69328800  | 0.23623600  |
| H | -7.52033400 | 0.02455200  | -0.39066200 |
| H | -7.34486000 | 0.67526800  | 1.24399500  |
| H | -7.04642700 | 1.70688500  | -0.15625100 |
| C | 2.01185300  | -0.67956000 | -0.11916700 |
| C | 2.95420200  | -1.84977700 | 0.07779000  |
| F | 2.40056000  | -3.00483200 | -0.28989800 |
| F | 3.31089700  | -1.97545400 | 1.36701100  |
| F | 4.07731100  | -1.69015300 | -0.62584500 |

### 5a

E= -1104.8372527 a.u., number of negative frequencies = 0

0 2

|   |             |             |             |
|---|-------------|-------------|-------------|
| C | 3.67359800  | -0.80592600 | -0.01458900 |
| C | 2.92540500  | -1.13761100 | -1.17072200 |
| C | 1.57466600  | -1.27735500 | -1.13979100 |
| C | 0.78137200  | -1.12959600 | 0.12649000  |
| C | 1.63507700  | -0.81673900 | 1.31604800  |
| C | 2.97476900  | -0.66349700 | 1.22035200  |
| O | 0.09483000  | -2.38488000 | 0.35220100  |
| C | -1.24965400 | -2.23695200 | 0.24123600  |
| C | -1.51580700 | -0.79960300 | -0.03796200 |
| C | -0.36568800 | -0.11733400 | -0.02670900 |
| O | -2.02142700 | -3.13114900 | 0.38003900  |
| C | 5.16210900  | -0.65328800 | -0.05708000 |
| C | -0.12812700 | 1.33380700  | -0.03467500 |
| C | -0.99414400 | 2.16924100  | 0.68107900  |
| C | -0.76659300 | 3.53612100  | 0.73504900  |

|   |             |             |             |
|---|-------------|-------------|-------------|
| C | 0.32626700  | 4.08789200  | 0.07473800  |
| C | 1.19812800  | 3.26417800  | -0.62838100 |
| C | 0.98268500  | 1.89335000  | -0.67455900 |
| C | -2.91437900 | -0.31149000 | -0.24540200 |
| F | -3.64367200 | -1.20448500 | -0.90913100 |
| F | -3.53231100 | -0.07579900 | 0.92415500  |
| F | -2.94785800 | 0.82878400  | -0.94573100 |
| H | 3.45200400  | -1.28670500 | -2.10776100 |
| H | 1.00799000  | -1.54487000 | -2.02453800 |
| H | 1.11830600  | -0.72391200 | 2.26449400  |
| H | 3.54744100  | -0.43628500 | 2.11388600  |
| H | 5.53969100  | -0.69935800 | -1.07862800 |
| H | 5.47075700  | 0.29974300  | 0.38194100  |
| H | 5.65045600  | -1.44493700 | 0.52052900  |
| H | -1.83649100 | 1.74160800  | 1.21125100  |
| H | -1.44236700 | 4.17009400  | 1.29553700  |
| H | 0.50090400  | 5.15635700  | 0.11358000  |
| H | 2.05267800  | 3.68898600  | -1.14063600 |
| H | 1.66787600  | 1.25982900  | -1.22193000 |

### 6a

E= -1104.8298726 a.u., number of negative frequencies = 0

0 2

|   |             |             |             |
|---|-------------|-------------|-------------|
| C | -1.25315500 | -0.39183100 | -0.79268400 |
| C | -2.30552900 | 0.65052000  | -0.54562800 |
| C | -3.49744800 | 0.37665000  | 0.04297400  |
| C | -3.79064400 | -0.94526800 | 0.49408200  |
| C | -2.84691600 | -1.97689300 | 0.33896400  |
| C | -1.65347300 | -1.72212200 | -0.25477600 |
| O | -0.75336900 | -2.74079100 | -0.42573800 |
| C | 0.58519600  | -2.48162800 | -0.36407900 |

|   |             |             |             |
|---|-------------|-------------|-------------|
| C | 0.97434900  | -1.08315500 | -0.02139900 |
| C | 0.15077500  | -0.05470400 | -0.26394300 |
| C | -4.53793900 | 1.44964400  | 0.23238200  |
| O | 1.36229200  | -3.35570200 | -0.58415600 |
| C | 2.39214200  | -0.94424400 | 0.48081100  |
| C | 0.54651300  | 1.37222200  | -0.17911000 |
| C | 1.47508800  | 1.87812700  | -1.08865300 |
| C | 1.83597000  | 3.21944900  | -1.04060700 |
| C | 1.28243800  | 4.05579300  | -0.07853500 |
| C | 0.36219300  | 3.55065500  | 0.83516800  |
| C | -0.01418100 | 2.21533700  | 0.78167900  |
| F | 2.70170500  | -1.92916400 | 1.32545600  |
| F | 3.27252900  | -0.98055600 | -0.52801200 |
| F | 2.58838500  | 0.20226400  | 1.13871500  |
| H | -1.10880400 | -0.48815600 | -1.88758300 |
| H | -2.09485400 | 1.65011600  | -0.90649500 |
| H | -4.74115000 | -1.15009000 | 0.96983200  |
| H | -3.04305300 | -2.98211500 | 0.69109500  |
| H | -5.45390200 | 1.19541000  | -0.30643200 |
| H | -4.79657100 | 1.55101500  | 1.28919000  |
| H | -4.18279700 | 2.41451800  | -0.12937200 |
| H | 1.91926600  | 1.21602600  | -1.82346900 |
| H | 2.55722500  | 3.60677100  | -1.74969200 |
| H | 1.57070400  | 5.09908600  | -0.03637000 |
| H | -0.06243900 | 4.19800600  | 1.59272700  |
| H | -0.73084800 | 1.81714100  | 1.49040900  |

### 7a

E= -1104.5455826 a.u., number of negative frequencies = 0

1 1

|   |            |             |            |
|---|------------|-------------|------------|
| C | 4.33407900 | -1.66468300 | 0.58903000 |
|---|------------|-------------|------------|

|   |             |             |             |
|---|-------------|-------------|-------------|
| C | 5.28965600  | -0.90762200 | -0.08756300 |
| C | 4.88856000  | 0.29346300  | -0.67808100 |
| C | 3.57270700  | 0.72394200  | -0.60375500 |
| C | 2.65639800  | -0.06604800 | 0.06874500  |
| C | 3.00721100  | -1.25690600 | 0.67876600  |
| C | 6.71576100  | -1.37578900 | -0.19909700 |
| O | 1.35105400  | 0.47833700  | 0.14624700  |
| C | 0.28007900  | -0.27734400 | 0.06068100  |
| C | -0.95053800 | 0.64686700  | 0.07919000  |
| O | 0.17158400  | -1.45842800 | -0.01896900 |
| C | -2.11712900 | 0.10820700  | 0.01468700  |
| C | -3.32256700 | -0.48812900 | -0.05744100 |
| C | -3.99931400 | -0.86625800 | 1.14885700  |
| C | -5.21930300 | -1.48553800 | 1.05824300  |
| C | -5.77356300 | -1.73356200 | -0.20774000 |
| C | -5.12651100 | -1.37189200 | -1.40003500 |
| C | -3.90547800 | -0.75068000 | -1.34104300 |
| C | -0.81668900 | 2.17014700  | 0.15657200  |
| F | -0.20995000 | 2.51637500  | 1.27526400  |
| F | -2.02805100 | 2.72742900  | 0.13604700  |
| F | -0.12914000 | 2.61613500  | -0.87925800 |
| H | 4.62807700  | -2.59451800 | 1.06193800  |
| H | 5.61737800  | 0.90317800  | -1.19981000 |
| H | 3.25058600  | 1.65718500  | -1.04812600 |
| H | 2.27864400  | -1.85642800 | 1.20490600  |
| H | 7.41108100  | -0.54235000 | -0.09051700 |
| H | 6.94866700  | -2.11925100 | 0.56300700  |
| H | 6.89256300  | -1.83017600 | -1.17731300 |
| H | -3.53250500 | -0.65646100 | 2.10340900  |
| H | -5.75350300 | -1.78332200 | 1.95077800  |
| H | -6.73898500 | -2.22471100 | -0.26686700 |

|   |             |             |             |
|---|-------------|-------------|-------------|
| H | -5.59066400 | -1.58473500 | -2.35392900 |
| H | -3.36832700 | -0.45617500 | -2.23426900 |

### 8a

E= -1104.8410386 a.u., number of negative frequencies = 0

0 2

|   |             |             |             |
|---|-------------|-------------|-------------|
| C | 3.08637900  | 1.83160600  | 0.22605500  |
| C | 4.00793600  | 0.74561200  | 0.01883800  |
| C | 3.52592200  | -0.48102200 | -0.27159500 |
| C | 2.07272700  | -0.73843100 | -0.48036100 |
| C | 1.17439200  | 0.39461000  | -0.08893700 |
| C | 1.71194300  | 1.63998500  | 0.19672900  |
| O | 1.73288100  | -1.94542800 | 0.22095700  |
| C | 0.42705800  | -2.29480900 | 0.27038100  |
| O | 0.11484400  | -3.37630100 | 0.67294500  |
| C | -0.56560900 | -1.24739300 | -0.09253600 |
| C | -0.22787900 | 0.07644700  | -0.07953400 |
| C | -1.97545600 | -1.75442300 | -0.25139500 |
| F | -2.75421400 | -0.87975200 | -0.90213900 |
| F | -2.00371000 | -2.88544000 | -0.95860800 |
| F | -2.56240300 | -2.00158200 | 0.92930000  |
| C | -1.22075100 | 1.18009700  | -0.00129200 |
| C | -2.12587500 | 1.22574200  | 1.05967400  |
| C | -3.03753200 | 2.26922300  | 1.15310300  |
| C | -3.05877600 | 3.26652000  | 0.18423300  |
| C | -2.16071800 | 3.22281600  | -0.87743200 |
| C | -1.23803500 | 2.18842700  | -0.96583800 |
| C | 5.47998700  | 1.01540500  | 0.17156800  |
| H | 3.48370800  | 2.81084700  | 0.46738400  |
| H | 4.18283000  | -1.33457100 | -0.39654600 |
| H | 1.89996100  | -0.94232100 | -1.55257700 |

|   |             |            |             |
|---|-------------|------------|-------------|
| H | 1.04889200  | 2.46258400 | 0.43656600  |
| H | -2.11325300 | 0.43936200 | 1.80561500  |
| H | -3.73528100 | 2.29993000 | 1.98089100  |
| H | -3.77555800 | 4.07571500 | 0.25440700  |
| H | -2.17983900 | 3.99382800 | -1.63806600 |
| H | -0.53683600 | 2.14919400 | -1.79206700 |
| H | 5.81152600  | 1.75878700 | -0.55776800 |
| H | 5.69596100  | 1.41147800 | 1.16668700  |
| H | 6.06475300  | 0.10749400 | 0.02732700  |

### 9a

E= -1104.8144501 a.u., number of negative frequencies = 0

0 2

|   |             |             |             |
|---|-------------|-------------|-------------|
| C | -3.38775000 | -0.43291800 | 1.01837500  |
| C | -4.05154700 | 0.28310200  | 0.02905900  |
| C | -3.28978600 | 0.92230000  | -0.96028700 |
| C | -1.91052200 | 0.84565600  | -0.96137900 |
| C | -1.24927700 | 0.08616600  | 0.01227100  |
| C | -2.00039300 | -0.53941500 | 1.01283200  |
| C | 0.23198700  | 0.00290800  | 0.02985100  |
| C | 0.83662100  | -1.20532400 | 0.02553500  |
| C | -5.55299200 | 0.37724200  | 0.00363400  |
| C | 0.93742200  | 1.30700300  | 0.01415100  |
| C | 2.02211800  | 1.52055500  | -0.84149400 |
| C | 2.63533000  | 2.76428200  | -0.89352100 |
| C | 2.17883700  | 3.80220200  | -0.08742900 |
| C | 1.09531700  | 3.59892000  | 0.76113200  |
| C | 0.46548700  | 2.36274000  | 0.79957900  |
| C | 2.30242100  | -1.43529700 | 0.31370500  |
| F | 2.46816000  | -2.54180700 | 1.04158400  |
| F | 3.02959500  | -1.57511700 | -0.80434300 |



|   |             |             |             |
|---|-------------|-------------|-------------|
| F | 2.84589400  | -0.43522200 | 1.01710600  |
| C | 0.13034400  | -2.44224400 | -0.41933600 |
| O | 0.69632600  | -3.43919300 | -0.79611900 |
| O | -1.18523800 | -2.43584100 | -0.48083100 |
| H | -3.95673600 | -0.91741600 | 1.80354500  |
| H | -3.79632100 | 1.49115500  | -1.73275400 |
| H | -1.33126200 | 1.35726700  | -1.72156700 |
| H | -1.49067700 | -1.08777200 | 1.79646200  |
| H | -5.99106200 | -0.02492100 | 0.91696700  |
| H | -5.87756900 | 1.41381700  | -0.10808900 |
| H | -5.95479900 | -0.18695400 | -0.84189500 |
| H | 2.37516900  | 0.71224800  | -1.47111700 |
| H | 3.47040100  | 2.92300400  | -1.56456900 |
| H | 2.66284800  | 4.77066300  | -0.12563800 |
| H | 0.73575600  | 4.40616800  | 1.38730300  |
| H | -0.38899200 | 2.20504700  | 1.44779600  |

### 10a

E= -1104.3041824 a.u., number of negative frequencies = 0

0 1

|   |             |             |             |
|---|-------------|-------------|-------------|
| C | 3.11657900  | 1.76710800  | -0.00000100 |
| C | 3.99290100  | 0.66858500  | -0.00000300 |
| C | 3.46205800  | -0.61157100 | -0.00000200 |
| C | 2.08214200  | -0.79105300 | 0.00000000  |
| C | 1.20070000  | 0.29073300  | 0.00000200  |
| C | 1.75041300  | 1.58453900  | 0.00000100  |
| O | 1.63461400  | -2.07150900 | 0.00000100  |
| C | 0.30069500  | -2.39466400 | 0.00000600  |
| O | -0.00358700 | -3.54708900 | -0.00000400 |
| C | -0.64952200 | -1.26499100 | 0.00000300  |

|   |             |             |             |
|---|-------------|-------------|-------------|
| C | -0.22991400 | 0.02093200  | 0.00000200  |
| C | -2.09093000 | -1.71416600 | 0.00000000  |
| F | -2.95557200 | -0.69516800 | -0.00000600 |
| F | -2.36100500 | -2.45363700 | 1.07944100  |
| F | -2.36099900 | -2.45364600 | -1.07943600 |
| C | -1.13508800 | 1.20619600  | 0.00000200  |
| C | -1.53154400 | 1.77767400  | -1.20633900 |
| C | -2.33515400 | 2.91161700  | -1.20391200 |
| C | -2.73789600 | 3.47936900  | 0.00000000  |
| C | -2.33515600 | 2.91161700  | 1.20391200  |
| C | -1.53154600 | 1.77767400  | 1.20634200  |
| C | 5.48077200  | 0.89141100  | -0.00000500 |
| H | 3.52540500  | 2.77116800  | -0.00000200 |
| H | 4.09427600  | -1.49112800 | -0.00000400 |
| H | 1.08426600  | 2.43842300  | 0.00000200  |
| H | -1.21774000 | 1.32727300  | -2.14119900 |
| H | -2.64944500 | 3.34910300  | -2.14365700 |
| H | -3.36638600 | 4.36152500  | -0.00000100 |
| H | -2.64944900 | 3.34910400  | 2.14365700  |
| H | -1.21774400 | 1.32727300  | 2.14120200  |
| H | 6.02467500  | -0.05266100 | -0.00001300 |
| H | 5.78252600  | 1.46235400  | -0.88111700 |
| H | 5.78252900  | 1.46234000  | 0.88111600  |

### 11a

E= -916.2580567 a.u., number of negative frequencies = 0

0 2

|   |            |             |             |
|---|------------|-------------|-------------|
| C | 2.95230800 | -0.70457100 | 0.80011600  |
| C | 3.14805300 | -1.76349100 | -0.08449300 |
| C | 2.09004800 | -2.13179500 | -0.91901800 |
| C | 0.87637500 | -1.46333700 | -0.87354300 |

|   |             |             |             |
|---|-------------|-------------|-------------|
| C | 0.69330400  | -0.39349300 | 0.00692000  |
| C | 1.74268400  | -0.02332500 | 0.84677000  |
| C | -0.60622400 | 0.33870000  | 0.03408600  |
| C | -0.64788000 | 1.65824900  | 0.04854700  |
| C | 4.47014000  | -2.48079000 | -0.15955600 |
| C | -1.87488300 | -0.44061400 | 0.05292600  |
| C | -1.92865800 | -1.69481600 | 0.66575700  |
| C | -3.12493000 | -2.40010300 | 0.71473800  |
| C | -4.27620100 | -1.86583700 | 0.14698300  |
| C | -4.22842900 | -0.61929400 | -0.47024300 |
| C | -3.03618100 | 0.08879300  | -0.51756400 |
| C | 0.29014600  | 2.79333600  | -0.02924500 |
| F | -0.31951400 | 3.87481900  | -0.53153000 |
| F | 1.34917000  | 2.53677500  | -0.80950900 |
| F | 0.76815800  | 3.14268200  | 1.17854200  |
| H | 3.75625400  | -0.40950300 | 1.46561400  |
| H | 2.22115300  | -2.95580700 | -1.61254100 |
| H | 0.06361800  | -1.76469500 | -1.52487300 |
| H | 1.60572600  | 0.79258400  | 1.54712100  |
| H | 5.04404200  | -2.34806500 | 0.75816400  |
| H | 4.32924900  | -3.55007800 | -0.32594600 |
| H | 5.06937400  | -2.09280300 | -0.98781100 |
| H | -1.03322600 | -2.11056400 | 1.11259900  |
| H | -3.15722000 | -3.36849900 | 1.19923000  |
| H | -5.20663700 | -2.41963400 | 0.18168000  |
| H | -5.12044000 | -0.20142300 | -0.92106200 |
| H | -2.99026500 | 1.05432300  | -1.00877700 |

## 12a

E= -1253.9769768 a.u., number of negative frequencies = 0

0 1

|   |             |             |             |
|---|-------------|-------------|-------------|
| C | 3.43138700  | -0.50176800 | -0.90791500 |
| C | 4.11818400  | 0.33672000  | -0.03117400 |
| C | 3.37470500  | 1.11849200  | 0.85632100  |
| C | 1.99013500  | 1.06490200  | 0.86838700  |
| C | 1.31018400  | 0.19726700  | 0.00950900  |
| C | 2.04546500  | -0.57815800 | -0.88796100 |
| C | -0.17460900 | 0.16467700  | 0.00228800  |
| C | -0.88035100 | -0.98304200 | -0.00050300 |
| C | 5.62280400  | 0.38968600  | -0.02428600 |
| C | -0.82520100 | 1.50253400  | -0.00232900 |
| C | -1.83066200 | 1.80382200  | 0.91835600  |
| C | -2.40005300 | 3.07067000  | 0.94004900  |
| C | -1.97671900 | 4.04098800  | 0.03891200  |
| C | -0.96943800 | 3.74790500  | -0.87577600 |
| C | -0.38353100 | 2.49006100  | -0.88604900 |
| C | -0.28861600 | -2.33731700 | 0.31995700  |
| F | 0.79876100  | -2.26394300 | 1.08741700  |
| F | 0.04405300  | -3.03398200 | -0.77880600 |
| F | -1.18274100 | -3.07594800 | 0.99304000  |
| C | -2.35584600 | -1.06137700 | -0.32325600 |
| F | -2.61495300 | -2.19150100 | -0.99666500 |
| F | -2.77581800 | -0.05588200 | -1.09116100 |
| F | -3.12897600 | -1.07544000 | 0.77451300  |
| H | 3.98818800  | -1.10259100 | -1.61856200 |
| H | 3.89049100  | 1.78432300  | 1.53997700  |
| H | 1.42639300  | 1.69105600  | 1.55065800  |
| H | 1.52840400  | -1.23289200 | -1.57961800 |
| H | 6.03507800  | 0.03909100  | -0.97091700 |
| H | 5.98035100  | 1.40528900  | 0.15309000  |
| H | 6.02255500  | -0.24573100 | 0.77073600  |
| H | -2.15827600 | 1.04531300  | 1.61946200  |

|   |             |            |             |
|---|-------------|------------|-------------|
| H | -3.17496100 | 3.29853500 | 1.66161100  |
| H | -2.42579300 | 5.02676600 | 0.05296300  |
| H | -0.63559000 | 4.50302700 | -1.57687800 |
| H | 0.41319700  | 2.26170700 | -1.58473700 |

### 13a

E= -1104.3029665 a.u., number of negative frequencies = 0

0 1

|   |             |             |             |
|---|-------------|-------------|-------------|
| C | -3.60715300 | 0.33169100  | 0.00000300  |
| C | -3.96805500 | -1.02527100 | 0.00000100  |
| C | -3.01658600 | -2.02613300 | -0.00000200 |
| C | -1.66932600 | -1.67748900 | -0.00000400 |
| C | -1.26880900 | -0.34202800 | -0.00000200 |
| C | -2.26126500 | 0.65336400  | 0.00000100  |
| O | -0.77023800 | -2.69458900 | -0.00000600 |
| C | 0.58439800  | -2.48749500 | -0.00000900 |
| O | 1.30587800  | -3.43643300 | -0.00000400 |
| C | 1.03443100  | -1.08037400 | -0.00000600 |
| C | 0.15990800  | -0.04925100 | -0.00000300 |
| C | -4.67090000 | 1.39834600  | 0.00000600  |
| C | 2.53920800  | -0.95031400 | -0.00000100 |
| F | 2.95422200  | 0.31978100  | -0.00007300 |
| F | 3.06817100  | -1.53267000 | -1.07960300 |
| F | 3.06815000  | -1.53254200 | 1.07968000  |
| C | 0.55026500  | 1.39000100  | 0.00000000  |
| C | 0.70187100  | 2.06883700  | 1.20637000  |
| C | 1.01780500  | 3.42228000  | 1.20393800  |
| C | 1.17616700  | 4.10012600  | 0.00000600  |
| C | 1.01780500  | 3.42228500  | -1.20393000 |
| C | 0.70187100  | 2.06884200  | -1.20636800 |
| H | -5.01934600 | -1.29333700 | 0.00000200  |

|   |             |             |             |
|---|-------------|-------------|-------------|
| H | -3.28158000 | -3.07545700 | -0.00000300 |
| H | -1.95618900 | 1.69340500  | 0.00000300  |
| H | -4.22871200 | 2.39457600  | 0.00000600  |
| H | -5.31003200 | 1.31027500  | -0.88154700 |
| H | -5.31002800 | 1.31027300  | 0.88156300  |
| H | 0.58164400  | 1.53330800  | 2.14128200  |
| H | 1.14383800  | 3.94595100  | 2.14371700  |
| H | 1.42510600  | 5.15428500  | 0.00000800  |
| H | 1.14383800  | 3.94596000  | -2.14370700 |
| H | 0.58164300  | 1.53331800  | -2.14128200 |

#### 14a

E= -1104.585284 a.u., number of negative frequencies = 0

1 1

|   |             |             |             |
|---|-------------|-------------|-------------|
| C | 3.55331900  | 0.58432900  | -0.02708100 |
| C | 3.94424000  | -0.76159900 | 0.30019000  |
| C | 3.10281900  | -1.84555600 | 0.25857100  |
| C | 1.77264000  | -1.63749400 | -0.10876600 |
| C | 1.29320800  | -0.31124100 | -0.54919700 |
| C | 2.27067300  | 0.79881100  | -0.39551600 |
| O | 0.96024200  | -2.64835300 | -0.10347100 |
| C | -0.46824500 | -2.49145400 | -0.27456500 |
| O | -1.06636500 | -3.45278700 | -0.57189000 |
| C | -0.95956400 | -1.12843000 | -0.00521400 |
| C | -0.16897100 | -0.05714200 | -0.16669500 |
| C | 4.57740600  | 1.67998600  | 0.06180700  |
| C | -2.43457000 | -1.06109400 | 0.36843000  |
| F | -3.19008400 | -1.05584900 | -0.72933600 |
| F | -2.76650100 | -2.11611800 | 1.10275100  |
| F | -2.71065300 | 0.02834700  | 1.07468600  |
| C | -0.63985100 | 1.34353400  | -0.12577700 |

|   |             |             |             |
|---|-------------|-------------|-------------|
| C | -0.16130900 | 2.22388100  | 0.84870500  |
| C | -0.63748100 | 3.52592900  | 0.89095100  |
| C | -1.56854300 | 3.95861600  | -0.05078400 |
| C | -2.03626800 | 3.08594500  | -1.02609400 |
| C | -1.58274200 | 1.77310300  | -1.06140200 |
| H | 4.97424900  | -0.92537800 | 0.60603100  |
| H | 3.42101500  | -2.84256700 | 0.53435000  |
| H | 1.25468000  | -0.43319100 | -1.65830700 |
| H | 1.92589900  | 1.78870700  | -0.67075600 |
| H | 4.99813400  | 1.72895400  | 1.06833000  |
| H | 5.39835500  | 1.49271900  | -0.63369400 |
| H | 4.13884500  | 2.64749600  | -0.17671600 |
| H | 0.55200600  | 1.88129500  | 1.59160800  |
| H | -0.28881000 | 4.20194500  | 1.66140200  |
| H | -1.93379500 | 4.97749700  | -0.01803500 |
| H | -2.76413100 | 3.42103500  | -1.75398500 |
| H | -1.96288000 | 1.08245400  | -1.80563000 |

### 15a

E= -1104.5753011 a.u., number of negative frequencies = 0

1 1

|   |             |             |             |
|---|-------------|-------------|-------------|
| C | 2.67579700  | -1.49785500 | 0.00000300  |
| C | 2.00900900  | -1.74104700 | -1.23633700 |
| C | 0.67067400  | -1.95234500 | -1.24474400 |
| C | -0.08923700 | -1.78443800 | 0.00000000  |
| C | 0.67067200  | -1.95233400 | 1.24474700  |
| C | 2.00900600  | -1.74103600 | 1.23634200  |
| O | -1.33871600 | -2.39126000 | 0.00000100  |
| C | -2.36890200 | -1.46302200 | -0.00000600 |
| C | -1.73738400 | -0.11051500 | -0.00000100 |
| C | -0.41558600 | -0.16749500 | 0.00000200  |

|   |             |             |             |
|---|-------------|-------------|-------------|
| O | -3.50473200 | -1.76401600 | -0.00001400 |
| C | 4.06269100  | -0.98946900 | 0.00000300  |
| C | 0.63373300  | 0.85381000  | -0.00000100 |
| C | 1.13382600  | 1.34513200  | 1.21147300  |
| C | 2.12699300  | 2.31464900  | 1.20829600  |
| C | 2.62934700  | 2.79336400  | -0.00000700 |
| C | 2.12698000  | 2.31465000  | -1.20830900 |
| C | 1.13381500  | 1.34513600  | -1.21148000 |
| C | -2.60783000 | 1.12081200  | 0.00000400  |
| F | -3.37997000 | 1.12686000  | -1.07906000 |
| F | -3.37997600 | 1.12684000  | 1.07906500  |
| F | -1.86933300 | 2.22782000  | 0.00001600  |
| H | 2.58426600  | -1.73561500 | -2.15406200 |
| H | 0.10251500  | -2.12166400 | -2.15392200 |
| H | 0.10251000  | -2.12164500 | 2.15392600  |
| H | 2.58426100  | -1.73559500 | 2.15407000  |
| H | 4.61005400  | -1.27332900 | -0.89835100 |
| H | 3.97834700  | 0.11166100  | 0.00002500  |
| H | 4.61006200  | -1.27336000 | 0.89834300  |
| H | 0.72858600  | 0.98205000  | 2.14937800  |
| H | 2.49979200  | 2.70608800  | 2.14644100  |
| H | 3.40073400  | 3.55381400  | -0.00001200 |
| H | 2.49977500  | 2.70609400  | -2.14645400 |
| H | 0.72856500  | 0.98205500  | -2.14938100 |

### 16a

E= -1104.5672373 a.u., number of negative frequencies = 0

1 1

|   |            |             |             |
|---|------------|-------------|-------------|
| C | 3.08431600 | 1.80101300  | 0.15944000  |
| C | 4.03674000 | 0.74925800  | 0.06724400  |
| C | 3.54265600 | -0.51060300 | -0.10553500 |



|   |             |             |             |
|---|-------------|-------------|-------------|
| C | 2.11097800  | -0.73728600 | -0.36032100 |
| C | 1.17080600  | 0.36188000  | -0.07614900 |
| C | 1.70204100  | 1.62896800  | 0.08658900  |
| O | 1.72127300  | -2.02757600 | -0.00984800 |
| C | 0.39774300  | -2.34039300 | 0.16120600  |
| O | 0.10212000  | -3.42693700 | 0.51964300  |
| C | -0.59687300 | -1.24788400 | -0.07519500 |
| C | -0.25586800 | 0.06335800  | -0.08063500 |
| C | -2.03568000 | -1.74737500 | -0.18510600 |
| F | -2.07718000 | -2.84620300 | -0.92510000 |
| F | -2.51830900 | -2.01750700 | 1.02452800  |
| F | -2.82204900 | -0.84632200 | -0.76375100 |
| C | -1.21539800 | 1.19156300  | -0.00931100 |
| C | -2.05870500 | 1.29696100  | 1.09775100  |
| C | -2.94983900 | 2.35865500  | 1.18390500  |
| C | -3.00890700 | 3.30333800  | 0.16524600  |
| C | -2.17196100 | 3.19456900  | -0.94221600 |
| C | -1.26688600 | 2.14567000  | -1.02795000 |
| C | 5.50158400  | 1.04174100  | 0.22239600  |
| H | 3.46046900  | 2.80678500  | 0.32941700  |
| H | 4.18009200  | -1.38873100 | -0.14888700 |
| H | 2.13308200  | -0.64632100 | -1.48706800 |
| H | 1.04183600  | 2.47618100  | 0.22253700  |
| H | -2.01868800 | 0.55013500  | 1.88298600  |
| H | -3.60327000 | 2.44209300  | 2.04298300  |
| H | -3.71230700 | 4.12407100  | 0.23026700  |
| H | -2.23035400 | 3.92225400  | -1.74177200 |
| H | -0.62753600 | 2.04979500  | -1.89953600 |
| H | 5.85551400  | 1.65469700  | -0.60944100 |
| H | 5.68595300  | 1.59171600  | 1.14692100  |
| H | 6.08543600  | 0.12313800  | 0.24399900  |

**TS1-3a**

E= -1104.7447315 a.u., im. freq.= 396.83i

0 2

|   |             |             |             |
|---|-------------|-------------|-------------|
| C | -0.94174100 | -0.52797600 | 0.23052900  |
| C | 0.45006000  | -0.95864800 | 0.37313700  |
| O | 0.79471500  | -1.90265300 | 1.01558600  |
| O | 1.25994400  | -0.13482400 | -0.32167600 |
| C | -0.62925600 | 1.75227000  | 0.37832200  |
| C | -2.14491700 | -0.67058300 | 0.09046500  |
| C | 2.64528800  | -0.27259800 | -0.25281700 |
| C | 3.29028900  | -1.49205800 | -0.39615200 |
| C | 4.67966800  | -1.51244300 | -0.38314600 |
| C | 5.42793500  | -0.34483200 | -0.23396900 |
| C | 4.74492700  | 0.86418100  | -0.10210300 |
| C | 3.35744100  | 0.90752300  | -0.10866500 |
| C | -3.55409500 | -0.63629500 | -0.09050600 |
| C | -4.40243900 | -1.28555300 | 0.81702800  |
| C | -5.77564900 | -1.23380500 | 0.63422700  |
| C | -6.31199300 | -0.54272100 | -0.44888700 |
| C | -5.47274700 | 0.10309300  | -1.35291300 |
| C | -4.09834100 | 0.06137400  | -1.17854500 |
| H | 2.72118700  | -2.40394500 | -0.50654400 |
| H | 5.19215000  | -2.46196800 | -0.49364300 |
| H | 5.30509900  | 1.78636800  | 0.00710800  |
| H | 2.81369800  | 1.83883400  | -0.01035300 |
| H | -3.97197000 | -1.82182600 | 1.65332700  |
| H | -6.43043000 | -1.73434200 | 1.33675800  |
| H | -7.38563800 | -0.50631000 | -0.58804900 |
| H | -5.89174600 | 0.64323700  | -2.19285300 |
| H | -3.43281100 | 0.56573700  | -1.86829100 |

|   |             |             |             |
|---|-------------|-------------|-------------|
| F | 0.28671700  | 2.08438800  | 1.27237100  |
| F | -1.81293300 | 2.20342100  | 0.74539400  |
| F | -0.30881300 | 2.23520900  | -0.80543100 |
| C | 6.93333300  | -0.39310700 | -0.18958100 |
| H | 7.36794200  | 0.54309200  | -0.54258900 |
| H | 7.28427900  | -0.55876000 | 0.83265400  |
| H | 7.31964200  | -1.20440000 | -0.80834400 |

**TS1-4a**

E= -1104.7400938 a.u., im. freq.= 462.91*i*

0 2

|   |             |             |             |
|---|-------------|-------------|-------------|
| C | 0.58580600  | -0.43108700 | 0.62980600  |
| C | -0.81422200 | -0.21696800 | 0.91262300  |
| O | -1.23614700 | 0.22792300  | 1.93924200  |
| O | -1.56084500 | -0.59462400 | -0.15066700 |
| C | -2.94618700 | -0.45296600 | -0.09795900 |
| C | -3.55419300 | 0.73965600  | 0.27063500  |
| C | -4.93820800 | 0.82403100  | 0.22401600  |
| C | -5.72362100 | -0.25591200 | -0.18490600 |
| C | -5.08072400 | -1.43460300 | -0.55602300 |
| C | -3.69519900 | -1.54036700 | -0.51283800 |
| C | 3.17189500  | -0.70048200 | 0.20955300  |
| C | 3.63388100  | -1.25236000 | -0.98833900 |
| C | 4.97775500  | -1.56953000 | -1.12583900 |
| C | 5.86267800  | -1.32984400 | -0.07892000 |
| C | 5.40458800  | -0.76981500 | 1.10968100  |
| C | 4.06248300  | -0.44929500 | 1.25683500  |
| H | -2.95464900 | 1.57957500  | 0.59356900  |
| H | -5.41970400 | 1.75255100  | 0.51185300  |
| H | -5.66859400 | -2.28470800 | -0.88409700 |
| H | -3.18546500 | -2.45032000 | -0.80326900 |

|   |             |             |             |
|---|-------------|-------------|-------------|
| H | 2.93470300  | -1.42804700 | -1.79646800 |
| H | 5.33555000  | -2.00226600 | -2.05188200 |
| H | 6.91137700  | -1.57719200 | -0.19062700 |
| H | 6.09427200  | -0.58049800 | 1.92289600  |
| H | 3.69204000  | -0.00883900 | 2.17416500  |
| C | -7.22627200 | -0.14479700 | -0.20346200 |
| H | -7.54454000 | 0.79638400  | -0.65589800 |
| H | -7.67514300 | -0.96301700 | -0.76753200 |
| H | -7.62923700 | -0.17623500 | 0.81221500  |
| C | 1.77453000  | -0.36643300 | 0.36011100  |
| C | 1.93408100  | 1.69907700  | -0.49339200 |
| F | 0.73508400  | 2.24121100  | -0.45422300 |
| F | 2.36227100  | 1.61011100  | -1.73656000 |
| F | 2.78163300  | 2.39160800  | 0.23933600  |

### TS3a-5a

E= -1104.8063829 a.u., im. freq.= 424.15i

0 2

|   |             |             |             |
|---|-------------|-------------|-------------|
| C | 2.12341000  | -1.68151800 | -1.20630200 |
| C | 0.77639400  | -1.96912500 | -1.22199900 |
| C | 0.06146700  | -1.94832000 | -0.00000100 |
| C | 0.77638500  | -1.96912000 | 1.22200200  |
| C | 2.12340200  | -1.68151500 | 1.20631300  |
| C | 2.81148400  | -1.47491100 | 0.00000800  |
| C | -0.48592400 | 0.11719000  | -0.00000300 |
| C | -1.78027500 | -0.08727600 | -0.00000100 |
| C | -2.26717900 | -1.49960100 | -0.00000500 |
| O | -1.24659000 | -2.40744300 | -0.00000500 |
| O | -3.40162400 | -1.84857200 | -0.00000800 |
| C | -2.83130500 | 0.99251100  | 0.00000300  |
| C | 0.55423300  | 1.07928200  | -0.00000400 |

|   |             |             |             |
|---|-------------|-------------|-------------|
| C | 1.11442200  | 1.51784900  | 1.21465100  |
| C | 2.19737400  | 2.38169200  | 1.20631500  |
| C | 2.74487900  | 2.81453400  | -0.00000600 |
| C | 2.19738300  | 2.38167800  | -1.20632600 |
| C | 1.11443100  | 1.51783500  | -1.21466100 |
| H | 2.66809300  | -1.61786200 | -2.14215900 |
| H | 0.22997700  | -2.13980800 | -2.14146200 |
| H | 0.22996200  | -2.13980100 | 2.14146100  |
| H | 2.66807900  | -1.61785700 | 2.14217400  |
| H | 0.68617700  | 1.17507200  | 2.14870200  |
| H | 2.61594900  | 2.72347700  | 2.14521900  |
| H | 3.59041900  | 3.49141700  | -0.00000700 |
| H | 2.61596600  | 2.72345300  | -2.14523100 |
| H | 0.68619400  | 1.17504600  | -2.14871000 |
| F | -3.61486500 | 0.90967200  | -1.07792300 |
| F | -3.61486400 | 0.90966400  | 1.07792800  |
| F | -2.27034800 | 2.20533300  | 0.00000700  |
| C | 4.24565500  | -1.03084200 | 0.00001200  |
| H | 4.29093700  | 0.06372600  | 0.00000400  |
| H | 4.77360900  | -1.38640700 | 0.88618200  |
| H | 4.77362000  | -1.38642000 | -0.88614700 |

### TS3a-6a

E= -1104.796205 a.u., im. freq.= 404.39i

0 2

|   |             |             |             |
|---|-------------|-------------|-------------|
| C | -0.93584500 | -1.29335600 | -1.16978500 |
| C | -2.29173300 | -0.94072800 | -0.99340900 |
| C | -3.03749200 | -1.46886000 | 0.04960600  |
| C | -2.44623700 | -2.42243100 | 0.89048800  |
| C | -1.12802400 | -2.83976300 | 0.69958600  |
| C | -0.39905700 | -2.29528700 | -0.33338000 |

|   |             |             |             |
|---|-------------|-------------|-------------|
| O | 0.90888000  | -2.67279200 | -0.52455900 |
| C | 1.90867800  | -1.74216100 | -0.46376700 |
| C | 1.52762400  | -0.33906800 | -0.09038500 |
| C | 0.33596600  | 0.18835800  | -0.29837200 |
| C | -4.45290200 | -1.01019100 | 0.28398800  |
| O | 3.03059400  | -2.07758600 | -0.66906100 |
| C | 2.67925900  | 0.45793900  | 0.48997300  |
| C | -0.32186700 | 1.45335100  | -0.16668800 |
| C | 0.02736500  | 2.52742300  | -0.99985600 |
| C | -0.66745500 | 3.72403100  | -0.91362000 |
| C | -1.71135100 | 3.86668600  | -0.00300700 |
| C | -2.06294300 | 2.80290900  | 0.82409200  |
| C | -1.38612100 | 1.59572500  | 0.73751500  |
| F | 3.30462500  | -0.21887300 | 1.45610900  |
| F | 3.58226700  | 0.76057000  | -0.44691200 |
| F | 2.25668300  | 1.60914700  | 1.02062900  |
| H | -0.44342600 | -1.08832700 | -2.11470400 |
| H | -2.74115400 | -0.22276400 | -1.67004500 |
| H | -3.02622800 | -2.84984000 | 1.70042100  |
| H | -0.66360400 | -3.57685300 | 1.34207200  |
| H | -4.95333100 | -0.78541600 | -0.65881300 |
| H | -5.03418700 | -1.76741600 | 0.81105600  |
| H | -4.46139700 | -0.09764800 | 0.88763600  |
| H | 0.84988400  | 2.41348200  | -1.69632100 |
| H | -0.38821000 | 4.55230700  | -1.55337000 |
| H | -2.24735500 | 4.80541800  | 0.06384900  |
| H | -2.86959300 | 2.91549000  | 1.53856700  |
| H | -1.65656200 | 0.75953100  | 1.37229100  |

**TS5a-9a**

E= -1104.8107684 a.u., im. freq.= 262.35i

02

|   |             |             |             |
|---|-------------|-------------|-------------|
| C | -3.28014400 | -0.26657900 | 1.17801800  |
| C | -1.90644200 | -0.37844100 | 1.16155400  |
| C | -1.18385500 | -0.17289100 | -0.04392800 |
| C | -1.89467200 | 0.27815700  | -1.18643900 |
| C | -3.26410900 | 0.36642200  | -1.15597200 |
| C | -3.98403700 | 0.08599600  | 0.02077500  |
| C | 0.30581900  | -0.03031700 | 0.01606500  |
| C | 0.99341000  | -1.18011600 | 0.03045700  |
| C | 0.20525300  | -2.41391600 | -0.30568800 |
| O | -1.08325700 | -2.18654000 | -0.42244300 |
| O | 0.69609500  | -3.49539300 | -0.50543100 |
| C | 2.46917100  | -1.34453300 | 0.26354100  |
| C | 0.82766100  | 1.35439300  | 0.01062700  |
| C | 1.94828000  | 1.68645500  | -0.75757200 |
| C | 2.40098900  | 2.99684800  | -0.80379100 |
| C | 1.74420900  | 3.98971200  | -0.08349200 |
| C | 0.62147200  | 3.67053200  | 0.67229800  |
| C | 0.15536900  | 2.36322500  | 0.70747600  |
| H | -3.82530900 | -0.46022600 | 2.09454300  |
| H | -1.35717000 | -0.66448200 | 2.05115700  |
| H | -1.33936800 | 0.51342300  | -2.08669200 |
| H | -3.80568400 | 0.66842100  | -2.04548600 |
| H | 2.45565000  | 0.91637300  | -1.32640400 |
| H | 3.26721800  | 3.24337100  | -1.40524500 |
| H | 2.10237900  | 5.01149900  | -0.11809300 |
| H | 0.10330400  | 4.44131500  | 1.22947300  |
| H | -0.72887600 | 2.12076400  | 1.28639300  |
| F | 3.14384600  | -1.46831700 | -0.89048300 |
| F | 2.99865600  | -0.30189600 | 0.91963100  |
| F | 2.72266600  | -2.42509800 | 0.99747400  |

|   |             |             |             |
|---|-------------|-------------|-------------|
| C | -5.48301800 | 0.15252500  | 0.02051300  |
| H | -5.87783300 | 0.25658500  | 1.03114400  |
| H | -5.84003400 | 0.98698300  | -0.58547900 |
| H | -5.89562900 | -0.76558000 | -0.40856500 |

**TS9a-8a**

E= -1104.8098112 a.u., im. freq.= 320.95i

0 2

|   |             |             |             |
|---|-------------|-------------|-------------|
| C | -1.18219000 | 0.35321300  | 0.09120700  |
| C | -2.02360700 | -0.47263500 | 0.88106700  |
| C | -3.42538200 | -0.29056100 | 0.83346000  |
| C | -3.98559600 | 0.64246600  | -0.00903100 |
| C | -3.12856600 | 1.45436500  | -0.78819700 |
| C | -1.75224700 | 1.32337200  | -0.73131900 |
| O | -1.64013200 | -2.10259100 | -0.23059800 |
| C | -0.35329200 | -2.31388100 | -0.36858600 |
| O | 0.05343900  | -3.32226400 | -0.89238700 |
| C | 0.61738700  | -1.24121500 | 0.05948400  |
| C | 2.02927900  | -1.73862700 | 0.25384700  |
| C | 0.26086000  | 0.06138700  | 0.08922200  |
| C | 1.18091900  | 1.22383200  | 0.04502900  |
| C | 0.94825900  | 2.32458700  | 0.87402200  |
| C | 1.78224100  | 3.43304200  | 0.81772800  |
| C | 2.83890700  | 3.46309500  | -0.08644200 |
| C | 3.06195800  | 2.38008600  | -0.93065600 |
| C | 2.24000300  | 1.26350900  | -0.86537800 |
| H | -1.59050000 | -1.00587700 | 1.71776400  |
| H | -4.05527900 | -0.90425100 | 1.46616800  |
| H | -3.56806800 | 2.19173000  | -1.45164300 |
| H | -1.11262000 | 1.94561700  | -1.34600800 |
| H | 0.11901900  | 2.30174400  | 1.57223400  |



|   |             |             |             |
|---|-------------|-------------|-------------|
| H | 1.60543700  | 4.27445900  | 1.47645500  |
| H | 3.48515100  | 4.33112400  | -0.13608600 |
| H | 3.87821300  | 2.40387500  | -1.64205300 |
| H | 2.41173300  | 0.41992500  | -1.52346800 |
| F | 2.03661800  | -2.88367400 | 0.93844600  |
| F | 2.66464800  | -1.95434200 | -0.90612400 |
| F | 2.77497800  | -0.87290200 | 0.95538200  |
| C | -5.47446300 | 0.83198900  | -0.10392500 |
| H | -6.00129800 | 0.17990300  | 0.59195900  |
| H | -5.74947800 | 1.86627000  | 0.11465200  |
| H | -5.82178900 | 0.60444700  | -1.11461300 |

### TS9a-11a

E= -1104.8035218 a.u., im. freq.= 482.14i

0 2

|   |             |             |             |
|---|-------------|-------------|-------------|
| C | 3.47548600  | -0.53479800 | -0.90102400 |
| C | 4.11225200  | 0.32319200  | -0.00554100 |
| C | 3.32165900  | 1.08683100  | 0.85702400  |
| C | 1.93978600  | 0.99540200  | 0.82695200  |
| C | 1.31039000  | 0.10838500  | -0.05327600 |
| C | 2.09173600  | -0.64927000 | -0.92670700 |
| C | -0.17184400 | 0.02994300  | -0.06856800 |
| C | -0.84749600 | -1.11731400 | -0.08045400 |
| C | 5.61387200  | 0.41517500  | 0.04793400  |
| C | -0.91150700 | 1.32620600  | -0.01072200 |
| C | -1.96119300 | 1.51508900  | 0.88890000  |
| C | -2.63008900 | 2.73250100  | 0.93000200  |
| C | -2.25932200 | 3.76179500  | 0.07282100  |
| C | -1.20702900 | 3.57877000  | -0.82011900 |
| C | -0.52533400 | 2.37080300  | -0.85503000 |
| C | -2.28512900 | -1.42831400 | -0.35955100 |

|   |             |             |             |
|---|-------------|-------------|-------------|
| F | -2.39788500 | -2.63155200 | -0.92892600 |
| F | -3.01560500 | -1.45688000 | 0.76443300  |
| F | -2.84766100 | -0.53885700 | -1.18010800 |
| C | -0.08233600 | -2.65591200 | 0.61570500  |
| O | -0.33058200 | -2.77948400 | 1.76019500  |
| O | 0.41727700  | -3.05140300 | -0.40494000 |
| H | 4.07033000  | -1.12158500 | -1.59228500 |
| H | 3.79789200  | 1.76662600  | 1.55534100  |
| H | 1.33867800  | 1.60474300  | 1.49214800  |
| H | 1.61273200  | -1.31837900 | -1.62915500 |
| H | 5.93901400  | 1.43754600  | 0.24704500  |
| H | 6.00538100  | -0.21881700 | 0.84818800  |
| H | 6.06371000  | 0.08572500  | -0.88911300 |
| H | -2.23959400 | 0.71454500  | 1.56368200  |
| H | -3.43959000 | 2.87575000  | 1.63507900  |
| H | -2.78421000 | 4.70890100  | 0.10422100  |
| H | -0.91373000 | 4.38063300  | -1.48664600 |
| H | 0.30279100  | 2.22609600  | -1.53920800 |

### TS11a-12a

E= -1253.8072444 a.u., im. freq.= 387.33i

0 3

|   |             |             |             |
|---|-------------|-------------|-------------|
| C | 3.25854200  | -0.33345300 | -0.59444000 |
| C | 3.92289000  | 0.78209100  | -0.08750300 |
| C | 3.17063400  | 1.74966100  | 0.58274200  |
| C | 1.80107800  | 1.60938000  | 0.73867800  |
| C | 1.14188200  | 0.47916300  | 0.23995200  |
| C | 1.88884000  | -0.48986800 | -0.43226500 |
| C | -0.32322000 | 0.33880500  | 0.43750600  |
| C | -0.90959600 | -0.83709200 | 0.66829700  |
| C | 5.41325500  | 0.93533200  | -0.23598900 |

|   |             |             |             |
|---|-------------|-------------|-------------|
| C | -1.19180000 | 1.53225400  | 0.26772900  |
| C | -2.35659800 | 1.66604000  | 1.03002000  |
| C | -3.18773000 | 2.76282300  | 0.85387100  |
| C | -2.87041400 | 3.73312600  | -0.09236100 |
| C | -1.71796300 | 3.60247600  | -0.86018900 |
| C | -0.87878200 | 2.51056500  | -0.68033900 |
| C | -0.63845200 | -2.10451300 | 1.37452600  |
| F | -1.00435900 | -2.00672200 | 2.66077900  |
| F | 0.65673700  | -2.45176500 | 1.35742400  |
| F | -1.32675800 | -3.12738300 | 0.84976900  |
| C | -1.15600400 | -1.73533300 | -1.56932000 |
| F | -0.38917300 | -2.76408300 | -1.89396400 |
| F | -0.85108400 | -0.69150600 | -2.31793500 |
| F | -2.42595700 | -2.04586100 | -1.70295000 |
| H | 3.82000500  | -1.09123500 | -1.12982200 |
| H | 3.66686800  | 2.62679400  | 0.98449900  |
| H | 1.23327600  | 2.37267300  | 1.25817900  |
| H | 1.40026200  | -1.36526400 | -0.84096700 |
| H | 5.68508800  | 1.97546900  | -0.42343100 |
| H | 5.92286800  | 0.61956500  | 0.67848600  |
| H | 5.79300800  | 0.32657100  | -1.05709200 |
| H | -2.59351600 | 0.90859800  | 1.76934100  |
| H | -4.08251900 | 2.86251800  | 1.45611700  |
| H | -3.52061400 | 4.58849900  | -0.23088300 |
| H | -1.47323100 | 4.35100500  | -1.60396600 |
| H | 0.01446600  | 2.40194600  | -1.28404200 |

**TS11a-12a (at B3LYP/6311G(d,p) level)**

E= -1104.9891214 a.u., im. freq.= 233.44i

1 1

|   |             |             |             |
|---|-------------|-------------|-------------|
| C | -0.64410700 | -1.56258900 | -1.08625900 |
|---|-------------|-------------|-------------|

|   |             |             |             |
|---|-------------|-------------|-------------|
| C | -2.03358900 | -1.30313000 | -1.21876700 |
| C | -2.89672500 | -1.51880100 | -0.16719900 |
| C | -2.36150300 | -2.04265200 | 1.05186000  |
| C | -1.03136300 | -2.36572500 | 1.20224100  |
| C | -0.16822800 | -2.15490500 | 0.11570600  |
| O | 1.11562500  | -2.57053800 | 0.18499700  |
| C | 2.12447300  | -1.65743600 | -0.13081200 |
| C | 1.62499300  | -0.23621300 | -0.11710400 |
| C | 0.34858800  | 0.06655900  | -0.23009500 |
| C | -4.37300100 | -1.26385000 | -0.27489400 |
| O | 3.23457800  | -2.01364800 | -0.31421200 |
| C | 2.71700700  | 0.82718600  | 0.05259100  |
| C | -0.53510700 | 1.17275900  | -0.08730200 |
| C | -1.00200100 | 1.89060300  | -1.20957500 |
| C | -1.79148700 | 3.01186800  | -1.02383500 |
| C | -2.14807700 | 3.41441400  | 0.26941900  |
| C | -1.70804100 | 2.69834100  | 1.38233400  |
| C | -0.90613000 | 1.57715100  | 1.21406100  |
| F | 2.19439900  | 2.05440500  | 0.17765700  |
| F | 3.43978300  | 0.56846800  | 1.14917700  |
| F | 3.52413200  | 0.82299900  | -1.01226600 |
| H | -0.02804500 | -1.61708200 | -1.97630600 |
| H | -2.40628700 | -0.93339300 | -2.16610600 |
| H | -3.03851400 | -2.21387500 | 1.88245700  |
| H | -0.64166100 | -2.79843400 | 2.11508500  |
| H | -4.64463300 | -0.87681100 | -1.25667300 |
| H | -4.93546400 | -2.18620600 | -0.10232500 |
| H | -4.69787000 | -0.54403200 | 0.48221000  |
| H | -0.71393900 | 1.58374900  | -2.20804200 |
| H | -2.12704000 | 3.58302400  | -1.88082200 |
| H | -2.76675900 | 4.29370200  | 0.40552100  |

|   |             |            |            |
|---|-------------|------------|------------|
| H | -1.97972200 | 3.02027100 | 2.38021300 |
| H | -0.54071900 | 1.02824600 | 2.07319100 |

## 2b

E= -344.8587758 a.u., number of negative frequencies = 0

0 2

|   |             |             |             |
|---|-------------|-------------|-------------|
| C | -1.26284600 | 1.33111100  | -0.00001600 |
| C | -2.16387200 | 0.26695200  | 0.00003300  |
| C | -1.70744900 | -1.04717800 | 0.00006400  |
| C | -0.34162100 | -1.30236900 | 0.00004700  |
| C | 0.55656000  | -0.23934000 | -0.00000200 |
| C | 0.10082400  | 1.08171100  | -0.00003400 |
| C | 2.01780000  | -0.52102000 | -0.00002000 |
| O | 2.90100100  | 0.25738800  | -0.00006800 |
| H | -1.62851500 | 2.35077200  | -0.00004000 |
| H | -3.22902800 | 0.46603100  | 0.00004700  |
| H | -2.41408200 | -1.86774300 | 0.00010200  |
| H | 0.04278000  | -2.31571500 | 0.00007100  |
| H | 0.82446200  | 1.88834900  | -0.00007200 |

## 3b

E= -1112.1040801 a.u., number of negative frequencies = 0

0 2

|   |             |             |             |
|---|-------------|-------------|-------------|
| C | -5.14130100 | -1.29878700 | -0.09804400 |
| C | -4.59296600 | -0.03109300 | -0.29834500 |
| C | -3.22577200 | 0.14020200  | -0.46400900 |
| C | -2.39643700 | -0.97265200 | -0.43348900 |
| C | -2.90731300 | -2.24833700 | -0.24615600 |
| C | -4.27989900 | -2.39493900 | -0.07843600 |
| O | -1.04809600 | -0.71869400 | -0.65930100 |
| C | -0.09042400 | -1.24265500 | 0.14378100  |

|   |             |             |             |
|---|-------------|-------------|-------------|
| O | -0.24827100 | -2.14995200 | 0.90372400  |
| C | 1.18480700  | -0.49453800 | -0.08550600 |
| C | 2.34337400  | -1.03447100 | 0.22288100  |
| C | -6.62261800 | -1.47439100 | 0.11675800  |
| C | 1.12741900  | 0.90496900  | -0.67251400 |
| C | 3.75001100  | -0.88834200 | 0.16800700  |
| C | 4.39223300  | -0.69332300 | -1.07075800 |
| C | 5.77250500  | -0.58649300 | -1.11991500 |
| C | 6.52746500  | -0.66592100 | 0.04791000  |
| C | 5.89835000  | -0.85746600 | 1.27696600  |
| C | 4.52138100  | -0.98025100 | 1.34213200  |
| O | 1.87393800  | 1.23283200  | -1.56067800 |
| C | 0.13281900  | 1.85791100  | -0.08430500 |
| C | -0.41616900 | 1.65960700  | 1.18278700  |
| C | -1.34394900 | 2.56249400  | 1.68672200  |
| C | -1.73413700 | 3.65702300  | 0.92139600  |
| C | -1.18349600 | 3.85942900  | -0.34204200 |
| C | -0.24407500 | 2.96711400  | -0.84048600 |
| H | -5.24474900 | 0.83552800  | -0.32562600 |
| H | -2.78606200 | 1.11918900  | -0.62160300 |
| H | -2.24646700 | -3.10256300 | -0.22459300 |
| H | -4.68786400 | -3.38916700 | 0.06857700  |
| H | -7.19141200 | -0.71707800 | -0.42489600 |
| H | -6.95559700 | -2.45725900 | -0.21958400 |
| H | -6.87337300 | -1.38329800 | 1.17722500  |
| H | 3.78843300  | -0.60157800 | -1.96398300 |
| H | 6.26302600  | -0.43020400 | -2.07288100 |
| H | 7.60614700  | -0.57847100 | 0.00133800  |
| H | 6.48710800  | -0.91891000 | 2.18397600  |
| H | 4.02294200  | -1.14656300 | 2.28925300  |
| H | -0.11815800 | 0.80476900  | 1.78108200  |

|   |             |            |             |
|---|-------------|------------|-------------|
| H | -1.76733000 | 2.40759100 | 2.67134300  |
| H | -2.46618700 | 4.35472800 | 1.31051000  |
| H | -1.48588600 | 4.71403400 | -0.93511700 |
| H | 0.20401100  | 3.10522800 | -1.81700400 |

#### 4b

E= -1112.0953697 a.u., number of negative frequencies = 0

0 2

|   |             |             |             |
|---|-------------|-------------|-------------|
| C | 5.17864300  | 0.99947500  | -0.08852800 |
| C | 4.56457300  | 2.15737000  | -0.56095100 |
| C | 3.18071900  | 2.29052400  | -0.55224700 |
| C | 2.40468800  | 1.25164800  | -0.06829600 |
| C | 2.98284800  | 0.07965700  | 0.40315600  |
| C | 4.36582900  | -0.03181200 | 0.38727500  |
| O | 1.02325400  | 1.40396800  | -0.16725800 |
| C | 0.23875900  | 1.00692300  | 0.86149700  |
| O | 0.62594000  | 0.68460600  | 1.94807600  |
| C | -1.16539100 | 1.02906400  | 0.47621000  |
| C | -2.16083700 | 0.18469700  | 0.32365200  |
| C | 6.67949500  | 0.86691200  | -0.06449700 |
| C | -3.55599800 | 0.58312700  | 0.02238900  |
| C | -1.83467800 | -1.28578600 | 0.58823000  |
| O | -2.57671700 | -1.95157100 | 1.26190500  |
| C | -4.48573400 | -0.34685200 | -0.44675700 |
| C | -5.77713600 | 0.05530300  | -0.76704200 |
| C | -6.15546400 | 1.38388200  | -0.61987300 |
| C | -5.23474900 | 2.31547500  | -0.14726700 |
| C | -3.94593000 | 1.91828300  | 0.17195800  |
| C | -0.56520700 | -1.84091600 | 0.02241500  |
| C | 0.02578700  | -2.92449300 | 0.67566400  |
| C | 1.18254000  | -3.49509100 | 0.16477500  |

|   |             |             |             |
|---|-------------|-------------|-------------|
| C | 1.73916100  | -3.00387700 | -1.01487500 |
| C | 1.14329200  | -1.93713000 | -1.67797300 |
| C | -0.00412000 | -1.34885900 | -1.15787800 |
| H | 5.17403400  | 2.96943300  | -0.94191500 |
| H | 2.69360100  | 3.18383300  | -0.92241100 |
| H | 2.36341500  | -0.72543300 | 0.77743400  |
| H | 4.82385000  | -0.94406700 | 0.75485200  |
| H | 7.14846700  | 1.56656400  | -0.75732700 |
| H | 7.06970100  | 1.07419900  | 0.93555400  |
| H | 6.98964400  | -0.14347200 | -0.33692700 |
| H | -4.20724800 | -1.38732900 | -0.55101600 |
| H | -6.48967800 | -0.67570300 | -1.12928000 |
| H | -7.16408600 | 1.69301800  | -0.86612700 |
| H | -5.52474100 | 3.35169700  | -0.02216800 |
| H | -3.23056900 | 2.64039200  | 0.54992400  |
| H | -0.43482400 | -3.29805600 | 1.58214100  |
| H | 1.64909700  | -4.32525800 | 0.68101100  |
| H | 2.64102200  | -3.45186700 | -1.41502500 |
| H | 1.57593100  | -1.55517400 | -2.59429200 |
| H | -0.46398200 | -0.51392800 | -1.67243500 |

### 5b

E= -1112.1282575 a.u., number of negative frequencies = 0

0 2

|   |            |             |             |
|---|------------|-------------|-------------|
| C | 4.43389000 | -1.02220800 | 0.33948400  |
| C | 3.88771700 | -1.10070900 | -0.96635900 |
| C | 2.54808700 | -1.10622300 | -1.18761400 |
| C | 1.54879600 | -1.07973200 | -0.06663900 |
| C | 2.19052100 | -1.00144800 | 1.28333100  |
| C | 3.53404200 | -0.97693000 | 1.44336100  |
| O | 0.79020600 | -2.31472100 | -0.15128900 |



|   |             |             |             |
|---|-------------|-------------|-------------|
| C | -0.50109100 | -2.06732600 | -0.48547500 |
| C | -0.67603700 | -0.59601400 | -0.58172000 |
| C | 0.48179300  | 0.00500200  | -0.27816300 |
| O | -1.31368200 | -2.92652800 | -0.64202400 |
| C | 5.91304500  | -1.04204400 | 0.57144400  |
| C | 0.75386900  | 1.43789900  | -0.09935800 |
| C | -0.29264800 | 2.31004000  | 0.22935700  |
| C | -0.05383500 | 3.66212400  | 0.41798600  |
| C | 1.23572600  | 4.16870300  | 0.28780800  |
| C | 2.28505700  | 3.31056700  | -0.01770800 |
| C | 2.05102100  | 1.95389400  | -0.20099100 |
| C | -1.96395800 | 0.00579700  | -1.06717000 |
| C | -3.19230900 | -0.18656400 | -0.24309300 |
| O | -1.97461100 | 0.63153900  | -2.09913100 |
| C | -4.40239200 | 0.30235100  | -0.74094400 |
| C | -5.56370000 | 0.16686300  | 0.00300300  |
| C | -5.52150000 | -0.45393300 | 1.24997600  |
| C | -4.31872700 | -0.93883600 | 1.75092400  |
| C | -3.15389900 | -0.80859400 | 1.00453700  |
| H | 4.56503400  | -1.15467500 | -1.81242000 |
| H | 2.13488400  | -1.16976500 | -2.18784900 |
| H | 1.51819000  | -0.97840800 | 2.13344500  |
| H | 3.94827200  | -0.92776100 | 2.44538100  |
| H | 6.46367800  | -0.84174900 | -0.34814400 |
| H | 6.20487700  | -0.30016300 | 1.31899200  |
| H | 6.23315700  | -2.02028900 | 0.94658500  |
| H | -1.29722000 | 1.92699000  | 0.36281400  |
| H | -0.87510600 | 4.32059000  | 0.67264300  |
| H | 1.42151500  | 5.22613200  | 0.43271800  |
| H | 3.29293300  | 3.69616900  | -0.11135500 |
| H | 2.87929800  | 1.29918400  | -0.43674700 |

|   |             |             |             |
|---|-------------|-------------|-------------|
| H | -4.40443600 | 0.78128700  | -1.71250100 |
| H | -6.50307700 | 0.54153600  | -0.38482900 |
| H | -6.42998700 | -0.56101300 | 1.83088000  |
| H | -4.28890100 | -1.42415000 | 2.71852800  |
| H | -2.21923000 | -1.19229600 | 1.39555000  |

## 6b

E= -1112.1210459 a.u., number of negative frequencies = 0

0 2

|   |             |             |             |
|---|-------------|-------------|-------------|
| C | 4.31757100  | -0.16131700 | 0.35881500  |
| C | 4.48191500  | -1.46798900 | -0.19129300 |
| C | 3.37812500  | -2.32987600 | -0.32260400 |
| C | 2.15039200  | -1.93433600 | 0.10092100  |
| C | 1.87639400  | -0.62205600 | 0.75300700  |
| C | 3.09661900  | 0.25253300  | 0.78267400  |
| O | 1.09120100  | -2.79554500 | -0.03037800 |
| C | -0.16660900 | -2.31387500 | -0.25885500 |
| O | -1.06944000 | -3.08555200 | -0.38432600 |
| C | -0.31219600 | -0.84126200 | -0.35664900 |
| C | 0.63116400  | -0.00886000 | 0.10005000  |
| C | 5.52268400  | 0.73814700  | 0.45182500  |
| C | -1.56156100 | -0.33769600 | -1.05518300 |
| C | 0.45083600  | 1.46353200  | 0.07135300  |
| C | 1.27695300  | 2.26495200  | -0.72050100 |
| C | 1.08044700  | 3.63843600  | -0.76136900 |
| C | 0.06858500  | 4.22449300  | -0.00601500 |
| C | -0.75404200 | 3.43148600  | 0.78428700  |
| C | -0.56787700 | 2.05381600  | 0.82046600  |
| C | -2.86539900 | -0.40549600 | -0.33126000 |
| O | -1.46625500 | 0.13273900  | -2.16020500 |
| C | -3.99568700 | 0.10996600  | -0.96756100 |

|   |             |             |             |
|---|-------------|-------------|-------------|
| C | -5.22271200 | 0.09741600  | -0.32191300 |
| C | -5.32659900 | -0.43022900 | 0.96298100  |
| C | -4.20322200 | -0.94623400 | 1.60036300  |
| C | -2.97335600 | -0.93528500 | 0.95427900  |
| H | 5.45877500  | -1.78633100 | -0.53228600 |
| H | 3.47605200  | -3.31052300 | -0.77181800 |
| H | 1.56817600  | -0.81433900 | 1.80075500  |
| H | 2.97600000  | 1.23981700  | 1.21314100  |
| H | 5.96153400  | 0.89572100  | -0.53643400 |
| H | 5.26081000  | 1.70963400  | 0.87098600  |
| H | 6.29122200  | 0.28620800  | 1.08363900  |
| H | 2.05649000  | 1.80312200  | -1.31493800 |
| H | 1.71428300  | 4.25273200  | -1.38929000 |
| H | -0.08078900 | 5.29690700  | -0.03953500 |
| H | -1.54666200 | 3.88125900  | 1.36967200  |
| H | -1.21509100 | 1.43197300  | 1.42938100  |
| H | -3.88492900 | 0.51570300  | -1.96566500 |
| H | -6.09949500 | 0.49711900  | -0.81669100 |
| H | -6.28583700 | -0.44155300 | 1.46696400  |
| H | -4.28698200 | -1.36317900 | 2.59641300  |
| H | -2.10215900 | -1.34900500 | 1.44808000  |

## 7b

E= -1111.8551735 a.u., number of negative frequencies = 0

1 1

|   |             |             |             |
|---|-------------|-------------|-------------|
| C | -5.13772100 | -1.73837500 | 0.12894000  |
| C | -4.47009000 | -2.00460200 | -1.06657800 |
| C | -3.15385700 | -1.60361600 | -1.26007300 |
| C | -2.51502000 | -0.92957400 | -0.23747100 |
| C | -3.14034800 | -0.63402100 | 0.96108500  |
| C | -4.45490800 | -1.04646500 | 1.13182400  |

|   |             |             |             |
|---|-------------|-------------|-------------|
| O | -1.20008400 | -0.48021300 | -0.50382600 |
| C | -0.23214400 | -0.75198100 | 0.35754800  |
| O | -0.27881400 | -1.34026100 | 1.38662700  |
| C | 1.05388700  | -0.12598700 | -0.18737600 |
| C | 2.22065900  | -0.58831000 | -0.00318900 |
| C | -6.55281300 | -2.20413300 | 0.34539300  |
| C | 0.88644000  | 1.15622200  | -1.12473600 |
| C | 3.49740400  | -1.05551500 | 0.11008400  |
| C | 4.01816300  | -1.89941400 | -0.91338900 |
| C | 5.30554400  | -2.37056100 | -0.79999000 |
| C | 6.07305300  | -2.01653700 | 0.31618000  |
| C | 5.57389700  | -1.18889700 | 1.33080000  |
| C | 4.29142500  | -0.70234900 | 1.23888600  |
| O | 1.17441900  | 1.03768200  | -2.26859400 |
| C | 0.34953300  | 2.34645400  | -0.44249300 |
| C | 0.13840200  | 2.38366100  | 0.93781400  |
| C | -0.37195300 | 3.53503800  | 1.52025300  |
| C | -0.67012700 | 4.63930900  | 0.72710600  |
| C | -0.45837100 | 4.60127000  | -0.64963000 |
| C | 0.05188400  | 3.45688300  | -1.23975900 |
| H | -4.98578100 | -2.53082200 | -1.86151800 |
| H | -2.63037800 | -1.79724900 | -2.18764900 |
| H | -2.61730600 | -0.09885000 | 1.74284000  |
| H | -4.96086300 | -0.82313000 | 2.06418100  |
| H | -7.07771400 | -2.32454600 | -0.60238800 |
| H | -6.56200800 | -3.16946600 | 0.85810100  |
| H | -7.11031300 | -1.49640800 | 0.95990900  |
| H | 3.39192100  | -2.14639000 | -1.76184000 |
| H | 5.72430900  | -3.01031000 | -1.56549900 |
| H | 7.08586900  | -2.39471900 | 0.39852800  |
| H | 6.19611800  | -0.93769500 | 2.17955400  |

|   |             |             |             |
|---|-------------|-------------|-------------|
| H | 3.86939300  | -0.06260900 | 2.00388600  |
| H | 0.37410200  | 1.52996200  | 1.56445500  |
| H | -0.53669600 | 3.57280500  | 2.58936500  |
| H | -1.07084900 | 5.53560300  | 1.18466800  |
| H | -0.69373700 | 5.46390600  | -1.25980500 |
| H | 0.22213700  | 3.40125400  | -2.30782600 |

### 8b

E= -1112.1311793 a.u., number of negative frequencies = 0

0 2

|   |             |             |             |
|---|-------------|-------------|-------------|
| C | -3.97871000 | 1.46723200  | 0.27343200  |
| C | -4.70027500 | 0.24668000  | 0.52589200  |
| C | -4.02446700 | -0.91985800 | 0.58169400  |
| C | -2.53709700 | -0.98189600 | 0.49724500  |
| C | -1.88841700 | 0.28559700  | 0.03046100  |
| C | -2.61774800 | 1.46504500  | 0.00439400  |
| O | -2.18324500 | -2.11291200 | -0.31075800 |
| C | -0.87462000 | -2.28541500 | -0.63232600 |
| O | -0.49405400 | -3.35652800 | -1.00130300 |
| C | 0.00062100  | -1.08688100 | -0.55046100 |
| C | -0.50365600 | 0.16186400  | -0.32775900 |
| C | 1.44698500  | -1.31273900 | -0.91861700 |
| C | 2.49275400  | -1.05510900 | 0.12184100  |
| O | 1.73841300  | -1.67579600 | -2.03078200 |
| C | 0.35148900  | 1.37069900  | -0.46159200 |
| C | 1.08155100  | 1.59688800  | -1.62983600 |
| C | 1.91393900  | 2.70563400  | -1.72937200 |
| C | 2.02853900  | 3.59146400  | -0.66443000 |
| C | 1.29973700  | 3.37388100  | 0.50117600  |
| C | 0.45941200  | 2.27348700  | 0.59968800  |
| C | -6.19532000 | 0.31699700  | 0.67908400  |

|   |             |             |             |
|---|-------------|-------------|-------------|
| C | 2.17531100  | -0.78143000 | 1.45190300  |
| C | 3.18725100  | -0.55605100 | 2.37755800  |
| C | 4.51756300  | -0.59970400 | 1.97628400  |
| C | 4.83909100  | -0.87481800 | 0.64889700  |
| C | 3.83070400  | -1.10444300 | -0.27410400 |
| H | -4.53205300 | 2.39820900  | 0.22770000  |
| H | -4.53204100 | -1.86627100 | 0.73099600  |
| H | -2.14190900 | -1.19261200 | 1.50986000  |
| H | -2.12217600 | 2.38726400  | -0.27581200 |
| H | 0.99479800  | 0.90061500  | -2.45598200 |
| H | 2.47550500  | 2.87393600  | -2.64012600 |
| H | 2.68425400  | 4.45038700  | -0.74098700 |
| H | 1.39033900  | 4.05951600  | 1.33494400  |
| H | -0.10435600 | 2.09630400  | 1.50940600  |
| H | -6.46451000 | 0.94225100  | 1.53424200  |
| H | -6.65185000 | 0.76054500  | -0.20903900 |
| H | -6.62372600 | -0.67355800 | 0.82906500  |
| H | 1.13828100  | -0.74984900 | 1.76521900  |
| H | 2.93828300  | -0.34790900 | 3.41099500  |
| H | 5.30588900  | -0.42186000 | 2.69822500  |
| H | 5.87629800  | -0.91123200 | 0.33857600  |
| H | 4.05224000  | -1.32658800 | -1.31083300 |

## 9b

E= -1112.1064676 a.u., number of negative frequencies = 0

0 2

|   |             |             |             |
|---|-------------|-------------|-------------|
| C | -4.07652600 | -1.10945200 | 0.83279400  |
| C | -4.69061300 | -0.89613000 | -0.39695200 |
| C | -3.94529400 | -0.29518700 | -1.41991200 |
| C | -2.62822900 | 0.07590900  | -1.22049800 |
| C | -2.00357400 | -0.17808500 | 0.00593200  |

|   |             |             |             |
|---|-------------|-------------|-------------|
| C | -2.74612300 | -0.75941100 | 1.03738100  |
| C | -0.59348900 | 0.23536400  | 0.23290200  |
| C | 0.35376900  | -0.66615900 | 0.55696800  |
| C | -6.11854000 | -1.30566900 | -0.63923200 |
| C | -0.31212000 | 1.68498700  | 0.08675500  |
| C | 0.85883700  | 2.14095600  | -0.52616600 |
| C | 1.09845400  | 3.50199000  | -0.65795600 |
| C | 0.17491200  | 4.42391700  | -0.17726600 |
| C | -0.99875600 | 3.97942600  | 0.42267700  |
| C | -1.24845500 | 2.61936700  | 0.54129200  |
| C | 1.73258700  | -0.27831300 | 1.06400600  |
| C | 0.12464900  | -2.13421800 | 0.52489700  |
| O | 0.98765600  | -2.95371800 | 0.74381900  |
| O | -1.07111000 | -2.58694200 | 0.19905000  |
| C | 2.92994500  | -0.60320200 | 0.23187900  |
| O | 1.82710300  | 0.28676400  | 2.12422600  |
| C | 2.81507400  | -1.13358700 | -1.05301500 |
| C | 3.95529100  | -1.38454700 | -1.80557900 |
| C | 5.21151100  | -1.11361700 | -1.27323000 |
| C | 5.32966500  | -0.58604000 | 0.01031800  |
| C | 4.19184900  | -0.32848100 | 0.76011500  |
| H | -4.64148200 | -1.55581200 | 1.64335800  |
| H | -4.41491000 | -0.11266200 | -2.38073800 |
| H | -2.06730800 | 0.55828700  | -2.01319500 |
| H | -2.27882700 | -0.92184500 | 2.00196600  |
| H | -6.62900600 | -1.53421200 | 0.29644900  |
| H | -6.67180800 | -0.51552100 | -1.15052300 |
| H | -6.15693300 | -2.19725600 | -1.27067700 |
| H | 1.57487600  | 1.43019500  | -0.92221300 |
| H | 2.00665000  | 3.84161600  | -1.14065000 |
| H | 0.36561000  | 5.48570700  | -0.27661500 |

|   |             |             |             |
|---|-------------|-------------|-------------|
| H | -1.72325000 | 4.69344300  | 0.79492200  |
| H | -2.16698300 | 2.27313200  | 1.00096500  |
| H | 1.83687500  | -1.34688400 | -1.46925200 |
| H | 3.86492300  | -1.79750000 | -2.80266600 |
| H | 6.10052300  | -1.31524800 | -1.85908300 |
| H | 6.30927000  | -0.37800700 | 0.42315500  |
| H | 4.25364900  | 0.08483500  | 1.75935300  |

### 10b

E= -1111.5975841 a.u., number of negative frequencies = 0

0 1

|   |             |             |             |
|---|-------------|-------------|-------------|
| C | 4.04493100  | 1.38086000  | 0.36622400  |
| C | 4.73373500  | 0.16232000  | 0.47923600  |
| C | 4.03333900  | -1.01974400 | 0.29830300  |
| C | 2.66979000  | -0.98773600 | 0.01965200  |
| C | 1.96844500  | 0.21697000  | -0.07254300 |
| C | 2.69325300  | 1.40872400  | 0.09306000  |
| O | 2.06020100  | -2.18821000 | -0.16165000 |
| C | 0.72866800  | -2.30559200 | -0.48604300 |
| O | 0.26685200  | -3.39931100 | -0.61246000 |
| C | -0.02391800 | -1.05100600 | -0.60342900 |
| C | 0.54638100  | 0.15420400  | -0.37920800 |
| C | -1.47465200 | -1.21425100 | -1.00088400 |
| C | -2.52403100 | -1.01108600 | 0.04178100  |
| O | -1.74864300 | -1.48991600 | -2.14186400 |
| C | -0.26730000 | 1.39640900  | -0.43455400 |
| C | -0.36867200 | 2.21450800  | 0.69382900  |
| C | -1.18084600 | 3.33995800  | 0.66965100  |
| C | -1.88640200 | 3.66567300  | -0.48511200 |
| C | -1.77963400 | 2.86143800  | -1.61335100 |
| C | -0.97633900 | 1.72680800  | -1.58993000 |



|   |             |             |             |
|---|-------------|-------------|-------------|
| C | 6.20720300  | 0.15281500  | 0.78531200  |
| C | -2.20670000 | -0.81290000 | 1.38499100  |
| C | -3.21972300 | -0.63475600 | 2.31958200  |
| C | -4.54909000 | -0.65049700 | 1.91317900  |
| C | -4.86981400 | -0.84991800 | 0.57190500  |
| C | -3.86084100 | -1.03259700 | -0.36056400 |
| H | 4.58852100  | 2.31100700  | 0.48825600  |
| H | 4.52065600  | -1.98527800 | 0.36049700  |
| H | 2.17830600  | 2.35578500  | -0.00929500 |
| H | 0.17578800  | 1.95215600  | 1.59474200  |
| H | -1.26742900 | 3.96060300  | 1.55319500  |
| H | -2.51945400 | 4.54452200  | -0.50313300 |
| H | -2.32570300 | 3.11251700  | -2.51437400 |
| H | -0.89862600 | 1.09042100  | -2.46384200 |
| H | 6.60729300  | -0.86074500 | 0.78158900  |
| H | 6.75725800  | 0.74250800  | 0.04861200  |
| H | 6.39764100  | 0.59239700  | 1.76738100  |
| H | -1.17013200 | -0.80279400 | 1.70137200  |
| H | -2.97233400 | -0.48592300 | 3.36348300  |
| H | -5.33823800 | -0.51004900 | 2.64243500  |
| H | -5.90665200 | -0.86484000 | 0.25876700  |
| H | -4.08088000 | -1.19641700 | -1.40841300 |

### 11b

E= -923.5576606 a.u., number of negative frequencies = 0

0 2

|   |            |             |             |
|---|------------|-------------|-------------|
| C | 2.11206500 | -2.95629500 | -0.67714000 |
| C | 2.99321900 | -3.00534800 | 0.40393700  |
| C | 3.09559000 | -1.88078600 | 1.22349600  |
| C | 2.34774000 | -0.73863000 | 0.97108400  |
| C | 1.46852600 | -0.69924400 | -0.11253100 |

|   |             |             |             |
|---|-------------|-------------|-------------|
| C | 1.35784500  | -1.82083300 | -0.93699500 |
| C | 0.62500700  | 0.50692600  | -0.37058800 |
| C | -0.61350400 | 0.33962500  | -0.76419500 |
| C | 3.83345100  | -4.22914900 | 0.65904700  |
| C | 1.19214100  | 1.87288300  | -0.18049800 |
| C | 0.37427700  | 2.92753400  | 0.23311600  |
| C | 0.89341100  | 4.20720600  | 0.37476000  |
| C | 2.23721600  | 4.44891200  | 0.10761900  |
| C | 3.05758000  | 3.40393600  | -0.30334100 |
| C | 2.54095400  | 2.12182500  | -0.44462400 |
| C | -1.80364300 | -0.28343900 | -1.23775000 |
| O | -1.85528500 | -0.74439400 | -2.37394900 |
| C | -2.98160800 | -0.32892800 | -0.31477900 |
| C | -4.18397300 | -0.83781300 | -0.80536900 |
| C | -5.29765400 | -0.90218600 | 0.01955000  |
| C | -5.21451900 | -0.46310100 | 1.33863100  |
| C | -4.01541400 | 0.04025700  | 1.83218600  |
| C | -2.89990200 | 0.10935100  | 1.00664800  |
| H | 2.01781500  | -3.81961900 | -1.32733000 |
| H | 3.76844500  | -1.90138500 | 2.07431200  |
| H | 2.43791400  | 0.12480300  | 1.62069600  |
| H | 0.68087800  | -1.79069200 | -1.78458400 |
| H | 4.10803400  | -4.30657200 | 1.71189000  |
| H | 3.30073400  | -5.13786600 | 0.37477300  |
| H | 4.75749600  | -4.19015300 | 0.07549900  |
| H | -0.67140800 | 2.73455300  | 0.44732000  |
| H | 0.24964600  | 5.01575400  | 0.69952900  |
| H | 2.64313900  | 5.44683000  | 0.22121800  |
| H | 4.10354200  | 3.58706000  | -0.51817100 |
| H | 3.18003400  | 1.30993900  | -0.77138400 |
| H | -4.21998400 | -1.17600400 | -1.83368300 |

|   |             |             |             |
|---|-------------|-------------|-------------|
| H | -6.23202600 | -1.29474400 | -0.36302200 |
| H | -6.08478700 | -0.51451400 | 1.98213400  |
| H | -3.94931300 | 0.37717200  | 2.85952000  |
| H | -1.96071500 | 0.49437600  | 1.38929500  |

## 12b

E= -1268.5615378 a.u., number of negative frequencies = 0

0 1

|   |             |             |             |
|---|-------------|-------------|-------------|
| C | 3.70716100  | 0.19804500  | -1.32965100 |
| C | 4.44462400  | 0.65193000  | -0.23680000 |
| C | 3.76382400  | 1.29670600  | 0.79873900  |
| C | 2.38849500  | 1.46371400  | 0.75435400  |
| C | 1.64733500  | 0.96259400  | -0.32044400 |
| C | 2.32818500  | 0.34996300  | -1.37458200 |
| C | 0.16817900  | 1.06138100  | -0.32256000 |
| C | -0.61737900 | 0.02492000  | -0.68684500 |
| C | 5.93314400  | 0.43730300  | -0.16573900 |
| C | -0.41028100 | 2.36044000  | 0.10944700  |
| C | -1.48392100 | 2.39953300  | 1.00271900  |
| C | -2.01306000 | 3.61497100  | 1.41529600  |
| C | -1.47640500 | 4.80599700  | 0.93796800  |
| C | -0.40153300 | 4.77646900  | 0.05513100  |
| C | 0.13690300  | 3.56179000  | -0.34753500 |
| C | -2.08380100 | 0.22408100  | -1.01952900 |
| C | -3.08699700 | -0.68176700 | -0.37265700 |
| O | -2.42312200 | 1.08133900  | -1.79497400 |
| C | -0.12785200 | -1.35467700 | -1.02808000 |
| O | -0.55893300 | -1.89426900 | -2.02323700 |
| C | -2.75455800 | -1.51288300 | 0.69638400  |
| C | -3.72758900 | -2.30925500 | 1.28980800  |
| C | -5.03318900 | -2.27895300 | 0.81354500  |

|   |             |             |             |
|---|-------------|-------------|-------------|
| C | -5.36953300 | -1.44812700 | -0.25324400 |
| C | -4.40107800 | -0.64931200 | -0.84143600 |
| C | 0.82210900  | -2.08564100 | -0.12086400 |
| C | 1.44980600  | -3.22224800 | -0.63137400 |
| C | 2.33173500  | -3.94743100 | 0.15672100  |
| C | 2.58052700  | -3.55011100 | 1.46757500  |
| C | 1.94206200  | -2.42937500 | 1.98842000  |
| C | 1.06660200  | -1.69694700 | 1.19651700  |
| H | 4.21929300  | -0.28007000 | -2.15769600 |
| H | 4.32257100  | 1.67307500  | 1.64910600  |
| H | 1.87483000  | 1.96835300  | 1.56559800  |
| H | 1.77117600  | 0.00091700  | -2.23739900 |
| H | 6.37673500  | 0.41502000  | -1.16202300 |
| H | 6.41955200  | 1.22521700  | 0.41103000  |
| H | 6.15632700  | -0.51727600 | 0.31916000  |
| H | -1.89872100 | 1.47056200  | 1.38101600  |
| H | -2.84353200 | 3.63193000  | 2.11059500  |
| H | -1.89177900 | 5.75462000  | 1.25626700  |
| H | 0.01848500  | 5.70190000  | -0.32001100 |
| H | 0.97701900  | 3.53571300  | -1.03200700 |
| H | -1.73813000 | -1.54223900 | 1.07449800  |
| H | -3.46546200 | -2.95399000 | 2.11970500  |
| H | -5.79033300 | -2.90360600 | 1.27267800  |
| H | -6.38734400 | -1.42688300 | -0.62356300 |
| H | -4.63534600 | 0.00989300  | -1.66826400 |
| H | 1.23141300  | -3.51669000 | -1.65061800 |
| H | 2.82410700  | -4.82347100 | -0.24789700 |
| H | 3.26825400  | -4.11637800 | 2.08454200  |
| H | 2.12862800  | -2.12311300 | 3.01056900  |
| H | 0.57762100  | -0.81871900 | 1.60269500  |

**13b**

E= -1111.5965043 a.u., number of negative frequencies = 0

0 1

|   |             |             |             |
|---|-------------|-------------|-------------|
| C | 4.24506100  | 0.72781300  | 0.43091600  |
| C | 4.72501300  | -0.58264000 | 0.57910000  |
| C | 3.89643000  | -1.67578900 | 0.41725300  |
| C | 2.55432200  | -1.47137800 | 0.10978700  |
| C | 2.03345000  | -0.18315700 | -0.02474100 |
| C | 2.90600800  | 0.90695500  | 0.12815000  |
| O | 1.78744500  | -2.58224100 | -0.05483500 |
| C | 0.46036300  | -2.52151300 | -0.40255700 |
| O | -0.15083300 | -3.54152600 | -0.51290600 |
| C | -0.10702000 | -1.17700400 | -0.56546500 |
| C | 0.61989100  | -0.05663200 | -0.35876800 |
| C | -1.56032400 | -1.14723800 | -0.98616300 |
| C | -2.58722900 | -0.79384600 | 0.03808600  |
| O | -1.85111300 | -1.39363500 | -2.12960300 |
| C | -0.01512000 | 1.28307400  | -0.46207300 |
| C | -0.03348400 | 2.13508400  | 0.64554300  |
| C | -0.68344800 | 3.35949100  | 0.57365200  |
| C | -1.30743000 | 3.74920400  | -0.60800100 |
| C | -1.28230100 | 2.90990400  | -1.71534600 |
| C | -0.64227900 | 1.67762400  | -1.64434800 |
| C | -2.26438600 | -0.62535200 | 1.38410700  |
| C | -3.25693300 | -0.30250600 | 2.30169500  |
| C | -4.57058100 | -0.14368100 | 1.87540500  |
| C | -4.89684300 | -0.31273500 | 0.53124600  |
| C | -3.90905400 | -0.63976300 | -0.38427100 |
| C | 5.17860500  | 1.89954000  | 0.59096300  |
| H | 5.77177400  | -0.74033000 | 0.81673100  |
| H | 4.25621400  | -2.69186400 | 0.51563700  |

|   |             |             |             |
|---|-------------|-------------|-------------|
| H | 2.51679900  | 1.90918100  | -0.00859200 |
| H | 0.44703300  | 1.82385600  | 1.56703900  |
| H | -0.70754200 | 4.00805700  | 1.44091200  |
| H | -1.81391000 | 4.70519700  | -0.66314200 |
| H | -1.76578700 | 3.20994700  | -2.63691500 |
| H | -0.63036500 | 1.01415900  | -2.50129600 |
| H | -1.24047800 | -0.75140900 | 1.71640000  |
| H | -3.00616400 | -0.17723700 | 3.34787500  |
| H | -5.34350400 | 0.10981500  | 2.59137700  |
| H | -5.92180100 | -0.19125800 | 0.20259800  |
| H | -4.13467300 | -0.78386700 | -1.43382600 |
| H | 4.65314000  | 2.84385300  | 0.44788800  |
| H | 5.62667000  | 1.90755900  | 1.58734200  |
| H | 5.99232600  | 1.85083000  | -0.13630500 |

#### 14b

E= -1111.886677 a.u., number of negative frequencies = 0

1 1

|   |             |             |             |
|---|-------------|-------------|-------------|
| C | 4.15344500  | -0.51677300 | 0.83336700  |
| C | 4.14619800  | -1.94671300 | 0.66826500  |
| C | 3.12893400  | -2.64781500 | 0.07489200  |
| C | 2.01791700  | -1.94013400 | -0.40039500 |
| C | 2.03967000  | -0.46487500 | -0.47868100 |
| C | 3.11942800  | 0.18371100  | 0.31835900  |
| O | 0.99521100  | -2.61615400 | -0.81381600 |
| C | -0.31023200 | -2.01242000 | -1.06174800 |
| O | -1.12866300 | -2.74064100 | -1.48033400 |
| C | -0.41414400 | -0.58912500 | -0.74415500 |
| C | 0.65843400  | 0.17115600  | -0.47767800 |
| C | 5.29119500  | 0.12271700  | 1.57766600  |
| C | -1.80354200 | 0.01114200  | -0.99597400 |

|   |             |             |             |
|---|-------------|-------------|-------------|
| C | -2.89500700 | -0.33197200 | -0.05825600 |
| O | -1.92818300 | 0.72287500  | -1.95505600 |
| C | 0.55851700  | 1.62604200  | -0.24642600 |
| C | 1.30804100  | 2.51647700  | -1.02128900 |
| C | 1.17732000  | 3.88378500  | -0.82529800 |
| C | 0.31455000  | 4.36745000  | 0.15458500  |
| C | -0.42636100 | 3.48379700  | 0.93104100  |
| C | -0.31243800 | 2.11412600  | 0.72960100  |
| C | -4.18573900 | 0.10886100  | -0.36201700 |
| C | -5.23278300 | -0.18543400 | 0.49641500  |
| C | -4.99555100 | -0.91563000 | 1.65939600  |
| C | -3.71121100 | -1.35285300 | 1.96788200  |
| C | -2.66040100 | -1.06314600 | 1.10805000  |
| H | 4.98803000  | -2.50514000 | 1.06893100  |
| H | 3.11675300  | -3.72889100 | 0.02605800  |
| H | 2.41519100  | -0.32744500 | -1.52442000 |
| H | 3.07875800  | 1.26346300  | 0.40258700  |
| H | 5.37127000  | -0.29290200 | 2.58424700  |
| H | 6.23666500  | -0.06386700 | 1.06372100  |
| H | 5.15070600  | 1.19918100  | 1.65979800  |
| H | 1.96147500  | 2.14755300  | -1.80586600 |
| H | 1.73977000  | 4.57231400  | -1.44318500 |
| H | 0.21634000  | 5.43495100  | 0.30730000  |
| H | -1.09916600 | 3.85953300  | 1.69146500  |
| H | -0.89283600 | 1.42357700  | 1.33212100  |
| H | -4.34309500 | 0.67334700  | -1.27292000 |
| H | -6.23526100 | 0.14958400  | 0.26201300  |
| H | -5.81636300 | -1.14589400 | 2.32770800  |
| H | -3.53304900 | -1.92010500 | 2.87257800  |
| H | -1.65954400 | -1.40214800 | 1.35591400  |

**15b**

E= -1111.8765008 a.u., number of negative frequencies = 0

1 1

|   |             |             |             |
|---|-------------|-------------|-------------|
| C | 3.77111700  | -0.82869400 | 0.35965700  |
| C | 3.38889600  | -1.18694800 | -0.96241500 |
| C | 2.17130700  | -1.74539900 | -1.17886400 |
| C | 1.21584200  | -1.83756700 | -0.07251900 |
| C | 1.78446800  | -1.83191000 | 1.27381200  |
| C | 3.00546000  | -1.27501900 | 1.47413300  |
| O | 0.18110700  | -2.73956600 | -0.27405400 |
| C | -1.02319800 | -2.10322300 | -0.55001800 |
| C | -0.78185900 | -0.63209500 | -0.47815200 |
| C | 0.47942400  | -0.35329100 | -0.18468800 |
| O | -2.00908400 | -2.70204500 | -0.78652600 |
| C | 4.96707600  | 0.01533300  | 0.57494400  |
| C | 1.20168600  | 0.90918500  | -0.03471100 |
| C | 1.64325400  | 1.59070900  | -1.17567500 |
| C | 2.33761600  | 2.78423100  | -1.04223000 |
| C | 2.59047800  | 3.30741800  | 0.22477500  |
| C | 2.13462300  | 2.64520200  | 1.36191800  |
| C | 1.44720000  | 1.44528100  | 1.23525700  |
| C | -1.81329000 | 0.42407600  | -0.85392200 |
| C | -3.12643600 | 0.40775100  | -0.18075200 |
| O | -1.48651500 | 1.22443200  | -1.69283800 |
| C | -4.12104800 | 1.25905600  | -0.67330300 |
| C | -5.36144600 | 1.29476700  | -0.05899500 |
| C | -5.61034500 | 0.49041200  | 1.05182600  |
| C | -4.62079600 | -0.35078900 | 1.55009200  |
| C | -3.37941000 | -0.39713700 | 0.93175400  |
| H | 4.07016800  | -0.98968000 | -1.78085900 |
| H | 1.81248600  | -2.01730500 | -2.16633300 |



|   |             |             |             |
|---|-------------|-------------|-------------|
| H | 1.15004300  | -2.17377700 | 2.08494200  |
| H | 3.40562800  | -1.14486200 | 2.47215100  |
| H | 5.71349000  | -0.12013600 | -0.20755200 |
| H | 4.61703200  | 1.05991500  | 0.51779100  |
| H | 5.40728800  | -0.13064300 | 1.56062000  |
| H | 1.41195700  | 1.19363400  | -2.15703000 |
| H | 2.66580000  | 3.31674500  | -1.92593000 |
| H | 3.12647200  | 4.24350500  | 0.32441100  |
| H | 2.30563900  | 3.06756600  | 2.34414700  |
| H | 1.08084100  | 0.93261000  | 2.11752800  |
| H | -3.90049900 | 1.87675300  | -1.53506800 |
| H | -6.13682600 | 1.94607400  | -0.44185300 |
| H | -6.58186400 | 0.51884200  | 1.53015300  |
| H | -4.82027700 | -0.97307800 | 2.41300400  |
| H | -2.61516200 | -1.05684300 | 1.32568200  |

### 16b

E= -1111.8717757 a.u., number of negative frequencies = 0

1 1

|   |             |             |             |
|---|-------------|-------------|-------------|
| C | -4.13619700 | 1.10353200  | 0.30957100  |
| C | -4.78721900 | -0.16638400 | 0.35625800  |
| C | -3.99154100 | -1.26830000 | 0.31465700  |
| C | -2.52267800 | -1.14566500 | 0.38109700  |
| C | -1.92659400 | 0.17386900  | 0.10105500  |
| C | -2.76525400 | 1.28063500  | 0.19784100  |
| O | -1.88200700 | -2.28179900 | -0.10887100 |
| C | -0.56359400 | -2.24817800 | -0.48270700 |
| O | -0.01134700 | -3.25688200 | -0.76454600 |
| C | 0.10772800  | -0.91613900 | -0.50664600 |
| C | -0.51754600 | 0.24893100  | -0.20327300 |
| C | 1.53265700  | -0.96301900 | -1.04605900 |

|   |             |             |             |
|---|-------------|-------------|-------------|
| C | 2.65975900  | -0.95665000 | -0.09872900 |
| O | 1.62676300  | -0.99923600 | -2.24565900 |
| C | 0.17325500  | 1.56267500  | -0.23579300 |
| C | 0.77176900  | 2.01652600  | -1.41240600 |
| C | 1.43257000  | 3.23954100  | -1.41915700 |
| C | 1.50455400  | 4.00277900  | -0.25962800 |
| C | 0.90887900  | 3.55052700  | 0.91477200  |
| C | 0.23752300  | 2.33592000  | 0.92725600  |
| C | -6.28699300 | -0.23672300 | 0.39582200  |
| C | 3.95441800  | -1.04668600 | -0.61807600 |
| C | 5.03925800  | -1.04816200 | 0.24281300  |
| C | 4.83532000  | -0.95992000 | 1.61900600  |
| C | 3.54781200  | -0.87021800 | 2.13896800  |
| C | 2.45767800  | -0.86843900 | 1.28004500  |
| H | -4.76408900 | 1.99065200  | 0.32590100  |
| H | -4.38656600 | -2.27927200 | 0.32969500  |
| H | -2.41041300 | -1.12943200 | 1.50500100  |
| H | -2.34878500 | 2.27484800  | 0.09544600  |
| H | 0.71897800  | 1.41684200  | -2.31340200 |
| H | 1.89373800  | 3.59268400  | -2.33279300 |
| H | 2.02685500  | 4.95137200  | -0.26844100 |
| H | 0.97328700  | 4.14066000  | 1.82026900  |
| H | -0.21465700 | 1.97590400  | 1.84632900  |
| H | -6.66365000 | 0.19812300  | 1.32421800  |
| H | -6.71744900 | 0.32434300  | -0.43573800 |
| H | -6.63360700 | -1.26687300 | 0.33366200  |
| H | 4.08334500  | -1.12014400 | -1.69104800 |
| H | 6.04440100  | -1.12173400 | -0.15247600 |
| H | 5.68578700  | -0.96401000 | 2.28995800  |
| H | 3.39795300  | -0.80490100 | 3.20908300  |
| H | 1.45420400  | -0.79844300 | 1.68681700  |

**TS1-3b**

E= -1112.0548571 a.u., im. freq.= 333.27i

0 2

|   |             |             |             |
|---|-------------|-------------|-------------|
| C | -4.79093800 | -1.69352100 | -0.41944700 |
| C | -4.29629600 | -0.44767600 | -0.79712400 |
| C | -2.93014100 | -0.18711100 | -0.79894200 |
| C | -2.05132200 | -1.18766200 | -0.42063000 |
| C | -2.51050100 | -2.44255500 | -0.04307500 |
| C | -3.87693800 | -2.68194200 | -0.04624700 |
| O | -0.69205500 | -0.88906000 | -0.49978400 |
| C | 0.09270200  | -1.09986800 | 0.58370000  |
| O | -0.27149600 | -1.61104000 | 1.60187200  |
| C | 1.43570100  | -0.58058100 | 0.34775400  |
| C | 2.64850600  | -0.72797900 | 0.26079000  |
| C | -6.27047500 | -1.98015900 | -0.40585300 |
| C | 0.92494900  | 1.55432400  | -0.28262600 |
| C | 4.05162700  | -0.67795800 | 0.06705700  |
| C | 4.57110500  | -0.39269300 | -1.20635000 |
| C | 5.94251600  | -0.34282100 | -1.39845600 |
| C | 6.80964500  | -0.56697500 | -0.33185800 |
| C | 6.30024400  | -0.84392800 | 0.93431100  |
| C | 4.93065100  | -0.90414300 | 1.13792900  |
| O | 1.73009800  | 1.98824600  | -1.01966400 |
| C | -0.36967400 | 2.14711400  | 0.13883100  |
| C | -0.99011900 | 1.73422200  | 1.31578100  |
| C | -2.22946800 | 2.26190400  | 1.65565300  |
| C | -2.84883300 | 3.18038500  | 0.81366200  |
| C | -2.22523400 | 3.59265700  | -0.36289300 |
| C | -0.97910100 | 3.08386100  | -0.70033100 |
| H | -4.98540000 | 0.33542300  | -1.09426900 |

|   |             |             |             |
|---|-------------|-------------|-------------|
| H | -2.53880700 | 0.77990200  | -1.09204700 |
| H | -1.80960900 | -3.20974200 | 0.25583500  |
| H | -4.24245000 | -3.65986600 | 0.24901000  |
| H | -6.61922800 | -2.18003000 | 0.61032300  |
| H | -6.83909300 | -1.13638700 | -0.79789100 |
| H | -6.50409100 | -2.85782800 | -1.01263700 |
| H | 3.88481700  | -0.20078600 | -2.02143800 |
| H | 6.33848800  | -0.12118100 | -2.38201700 |
| H | 7.88089800  | -0.52386700 | -0.48667700 |
| H | 6.97438500  | -1.01673900 | 1.76437200  |
| H | 4.52366300  | -1.12537600 | 2.11668700  |
| H | -0.50754400 | 1.00536500  | 1.95700900  |
| H | -2.71794300 | 1.94405700  | 2.56806300  |
| H | -3.82282900 | 3.57732300  | 1.07397400  |
| H | -2.70983900 | 4.31259600  | -1.01142700 |
| H | -0.46942600 | 3.39059700  | -1.60608300 |

#### TS1-4b

E= -1112.0541643 a.u., im. freq.= 379.02i

0 2

|   |             |             |             |
|---|-------------|-------------|-------------|
| C | -5.17942700 | -0.93011800 | -0.12412800 |
| C | -4.57056700 | -1.94775600 | -0.85547900 |
| C | -3.18814900 | -2.09675800 | -0.86556500 |
| C | -2.40579300 | -1.21443400 | -0.13991200 |
| C | -2.98083000 | -0.18356100 | 0.59263900  |
| C | -4.36216200 | -0.05357900 | 0.59314000  |
| O | -1.02836600 | -1.34712200 | -0.26274000 |
| C | -0.25092300 | -1.24811500 | 0.85209400  |
| O | -0.66579200 | -1.23936400 | 1.97498600  |
| C | 1.13303500  | -1.13980700 | 0.47665900  |
| C | 2.23508300  | -0.67676500 | 0.20157200  |

|   |             |             |             |
|---|-------------|-------------|-------------|
| C | -6.67950300 | -0.79203700 | -0.08152100 |
| C | 3.65451700  | -0.72040400 | -0.07503200 |
| C | 1.85600800  | 1.50485600  | 0.50829500  |
| O | 2.53973400  | 1.98372700  | 1.33474300  |
| C | 4.26143400  | 0.17361300  | -0.95934800 |
| C | 5.61893300  | 0.07232400  | -1.22753800 |
| C | 6.38192400  | -0.91432700 | -0.61126000 |
| C | 5.78226800  | -1.80370100 | 0.27468000  |
| C | 4.42413700  | -1.71073200 | 0.54439200  |
| C | 0.50194300  | 1.92221700  | 0.05810700  |
| C | -0.17512600 | 2.90390300  | 0.78693900  |
| C | -1.41747200 | 3.34203100  | 0.35075600  |
| C | -1.97487400 | 2.80579600  | -0.80837200 |
| C | -1.29716700 | 1.82963400  | -1.53246600 |
| C | -0.05491100 | 1.38389800  | -1.10028400 |
| H | -5.18350100 | -2.63710600 | -1.42590900 |
| H | -2.70553800 | -2.88211600 | -1.43366600 |
| H | -2.35520400 | 0.50171900  | 1.15052800  |
| H | -4.81564300 | 0.74955700  | 1.16467600  |
| H | -7.14337700 | -1.25770600 | -0.95201700 |
| H | -7.08684200 | -1.27391100 | 0.81142800  |
| H | -6.97809900 | 0.25741000  | -0.05548100 |
| H | 3.66333300  | 0.94556800  | -1.42860400 |
| H | 6.08330700  | 0.76787500  | -1.91572400 |
| H | 7.44277000  | -0.98731100 | -0.81797300 |
| H | 6.37385800  | -2.57044100 | 0.75985700  |
| H | 3.94545400  | -2.39624200 | 1.23249100  |
| H | 0.28495300  | 3.30737400  | 1.68119700  |
| H | -1.95121900 | 4.10023000  | 0.91082500  |
| H | -2.94877800 | 3.14267700  | -1.14331100 |
| H | -1.74351900 | 1.40534800  | -2.42313300 |

H 0.47916800 0.61208700 -1.64131000

**TS3b-5b**

E= -1112.0953931 a.u., im. freq.= 405.05i

0 2

|   |             |             |             |
|---|-------------|-------------|-------------|
| C | 3.86615500  | -1.00126800 | 0.30066100  |
| C | 3.39423100  | -1.22861800 | -1.00009700 |
| C | 2.14084900  | -1.75685300 | -1.22529200 |
| C | 1.28164500  | -1.96959000 | -0.12169200 |
| C | 1.81712600  | -1.95065600 | 1.18641300  |
| C | 3.07605500  | -1.42485600 | 1.38104400  |
| O | 0.09250900  | -2.64915000 | -0.33427200 |
| C | -1.04674900 | -1.93583100 | -0.59122600 |
| C | -0.84948000 | -0.46046200 | -0.49506300 |
| C | 0.34652400  | -0.03605800 | -0.15663100 |
| O | -2.06203800 | -2.49511700 | -0.85984900 |
| C | 5.17735700  | -0.30753100 | 0.53541500  |
| C | 1.16265000  | 1.11311200  | 0.00690800  |
| C | 1.58097400  | 1.52575800  | 1.28568700  |
| C | 2.46120700  | 2.58744700  | 1.41874800  |
| C | 2.95385000  | 3.23828300  | 0.28887400  |
| C | 2.54665500  | 2.83300300  | -0.98077500 |
| C | 1.65528800  | 1.78271400  | -1.12923600 |
| C | -1.96682700 | 0.48946700  | -0.88054700 |
| C | -3.27122900 | 0.40316300  | -0.16303400 |
| O | -1.75634300 | 1.31965900  | -1.73035600 |
| C | -4.33627000 | 1.16410800  | -0.64926800 |
| C | -5.56068300 | 1.13954800  | -0.00006800 |
| C | -5.72415900 | 0.36272700  | 1.14460400  |
| C | -4.66336900 | -0.38928800 | 1.63736300  |
| C | -3.43874200 | -0.37399900 | 0.98207500  |

|   |             |             |             |
|---|-------------|-------------|-------------|
| H | 4.03194600  | -0.98738300 | -1.84361300 |
| H | 1.76336500  | -1.94370000 | -2.22320200 |
| H | 1.19630600  | -2.28754600 | 2.00746500  |
| H | 3.46920200  | -1.33802900 | 2.38844700  |
| H | 5.65432000  | -0.65582800 | 1.45311000  |
| H | 5.86634400  | -0.46507200 | -0.29571900 |
| H | 5.01116200  | 0.77080600  | 0.63285400  |
| H | 1.20638000  | 1.00485100  | 2.15848100  |
| H | 2.76865400  | 2.90875000  | 2.40672200  |
| H | 3.64608100  | 4.06431600  | 0.39821000  |
| H | 2.91736600  | 3.34812200  | -1.85875000 |
| H | 1.31287200  | 1.47202900  | -2.10844500 |
| H | -4.17861800 | 1.76553500  | -1.53606100 |
| H | -6.38845600 | 1.72453300  | -0.38193000 |
| H | -6.68105100 | 0.34356800  | 1.65278900  |
| H | -4.79191600 | -0.99206300 | 2.52782500  |
| H | -2.61531300 | -0.96193900 | 1.36846200  |

### TS3b-6b

E= -1112.0856365 a.u., im. freq.= 398.93i

0 2

|   |             |             |             |
|---|-------------|-------------|-------------|
| C | -4.17446500 | -0.33925400 | -0.25655400 |
| C | -4.08061600 | -1.40496500 | 0.64719000  |
| C | -2.98801900 | -2.27484500 | 0.63047700  |
| C | -1.98593000 | -2.07158500 | -0.28993700 |
| C | -2.01407700 | -0.97979300 | -1.18361700 |
| C | -3.16121300 | -0.15816900 | -1.18769800 |
| O | -0.88388300 | -2.89838000 | -0.29708900 |
| C | 0.35654100  | -2.38168100 | -0.04600400 |
| O | 1.30272000  | -3.10820900 | -0.05348900 |
| C | 0.45471200  | -0.92513300 | 0.26379400  |

|   |             |             |             |
|---|-------------|-------------|-------------|
| C | -0.41942800 | -0.01702200 | -0.12005800 |
| C | -5.34515300 | 0.60799700  | -0.21303800 |
| C | 1.66367900  | -0.51357200 | 1.10321200  |
| C | -0.54883500 | 1.40924900  | -0.03394600 |
| C | -1.60082400 | 1.97163700  | 0.70692400  |
| C | -1.75503000 | 3.34867400  | 0.75526800  |
| C | -0.88386400 | 4.17896700  | 0.05373300  |
| C | 0.15372500  | 3.62624700  | -0.69193300 |
| C | 0.32469700  | 2.25042200  | -0.74143300 |
| C | 2.95822100  | -0.28275100 | 0.39723700  |
| O | 1.53029100  | -0.33409700 | 2.28479900  |
| C | 4.02694200  | 0.22588300  | 1.13767500  |
| C | 5.24371300  | 0.47196500  | 0.52059500  |
| C | 5.40032200  | 0.20587500  | -0.83788300 |
| C | 4.34031000  | -0.30765500 | -1.57740900 |
| C | 3.11890900  | -0.55221900 | -0.96151900 |
| H | -4.87289200 | -1.56176200 | 1.37013100  |
| H | -2.90515300 | -3.09954500 | 1.32677300  |
| H | -1.35969000 | -0.99903100 | -2.04841100 |
| H | -3.23121100 | 0.64525400  | -1.91234500 |
| H | -5.64711900 | 0.90404800  | -1.21883700 |
| H | -6.20365600 | 0.15661000  | 0.28510800  |
| H | -5.07791100 | 1.51834200  | 0.33182700  |
| H | -2.27152200 | 1.31584300  | 1.25030000  |
| H | -2.55690700 | 3.77830000  | 1.34381000  |
| H | -1.01143300 | 5.25391400  | 0.09115100  |
| H | 0.83666500  | 4.27045700  | -1.23241000 |
| H | 1.13647900  | 1.81497100  | -1.31336900 |
| H | 3.87711600  | 0.42134600  | 2.19244800  |
| H | 6.07185100  | 0.86936600  | 1.09466600  |
| H | 6.35216200  | 0.39605900  | -1.31964600 |



|   |            |             |             |
|---|------------|-------------|-------------|
| H | 4.46723100 | -0.52368600 | -2.63108900 |
| H | 2.29707000 | -0.96463900 | -1.53434500 |

### TS5b-9b

E= -1112.102747 a.u., im. freq.= 271.80i

0 2

|   |             |             |             |
|---|-------------|-------------|-------------|
| C | 4.57273500  | -1.06326900 | 0.35640100  |
| C | 4.06172500  | -0.88783000 | -0.93628100 |
| C | 2.74406200  | -0.53858900 | -1.13238600 |
| C | 1.86572100  | -0.39048900 | -0.02393200 |
| C | 2.41528600  | -0.47639400 | 1.28240900  |
| C | 3.72840700  | -0.83801100 | 1.45895800  |
| O | 1.12049400  | -2.28624400 | -0.22910700 |
| C | -0.12523100 | -2.04326100 | -0.56514900 |
| C | -0.46604400 | -0.58510900 | -0.58543100 |
| C | 0.52584100  | 0.24394900  | -0.23749400 |
| O | -0.92338600 | -2.91773300 | -0.80714400 |
| C | 5.99242300  | -1.50047600 | 0.56857400  |
| C | 0.42485200  | 1.70668500  | -0.04404400 |
| C | -0.76747100 | 2.29046800  | 0.39990200  |
| C | -0.85426300 | 3.66242600  | 0.58316700  |
| C | 0.24749200  | 4.47427400  | 0.33105200  |
| C | 1.44177100  | 3.90352700  | -0.09275700 |
| C | 1.53426500  | 2.52901400  | -0.26888700 |
| C | -1.83181700 | -0.18171600 | -1.07988100 |
| C | -3.02639200 | -0.53436500 | -0.25717800 |
| O | -1.92729400 | 0.42228200  | -2.12033100 |
| C | -4.28779100 | -0.18989400 | -0.74635500 |
| C | -5.42206400 | -0.47162400 | -0.00099700 |
| C | -5.30112800 | -1.09626500 | 1.23858400  |
| C | -4.04654100 | -1.43927800 | 1.73036200  |

|   |             |             |             |
|---|-------------|-------------|-------------|
| C | -2.90870400 | -1.16200000 | 0.98271000  |
| H | 4.71355200  | -1.03449400 | -1.78987200 |
| H | 2.33941600  | -0.40976500 | -2.12978800 |
| H | 1.76973000  | -0.28537400 | 2.13155100  |
| H | 4.13026300  | -0.94309700 | 2.46059500  |
| H | 6.42116000  | -1.03329600 | 1.45657300  |
| H | 6.02939700  | -2.58423400 | 0.71566000  |
| H | 6.61612300  | -1.25969300 | -0.29256300 |
| H | -1.62497300 | 1.66746700  | 0.62652600  |
| H | -1.78316900 | 4.09805700  | 0.93028700  |
| H | 0.17679900  | 5.54590900  | 0.47293100  |
| H | 2.30571400  | 4.52838600  | -0.28374300 |
| H | 2.47204900  | 2.09270800  | -0.59375600 |
| H | -4.35069500 | 0.29566800  | -1.71258900 |
| H | -6.40108100 | -0.20836600 | -0.38255000 |
| H | -6.18782600 | -1.31813700 | 1.82071700  |
| H | -3.95517500 | -1.93060400 | 2.69115300  |
| H | -1.93261400 | -1.43819900 | 1.36344300  |

### TS9b-8b

E= -1112.0997213 a.u., im. freq.= 328.14i

0 2

|   |             |             |             |
|---|-------------|-------------|-------------|
| C | -4.26430200 | -0.10690300 | -0.26321400 |
| C | -4.36968600 | -1.37640700 | 0.35345400  |
| C | -3.22680500 | -1.97352900 | 0.83161300  |
| C | -1.96325300 | -1.35810900 | 0.66187700  |
| C | -1.87864300 | -0.09029800 | 0.03100100  |
| C | -3.04558800 | 0.53130200  | -0.40996800 |
| O | -1.06025000 | -2.33006000 | -0.84092800 |
| C | 0.08634500  | -1.78250500 | -1.16419800 |
| O | 0.88880400  | -2.37304400 | -1.85146200 |

|   |             |             |             |
|---|-------------|-------------|-------------|
| C | 0.39868000  | -0.37753800 | -0.71501000 |
| C | -0.54243900 | 0.46760000  | -0.24814400 |
| C | 1.83779000  | 0.00001300  | -0.98065200 |
| C | 2.87887100  | -0.60945400 | -0.09773300 |
| O | 2.13303500  | 0.76034000  | -1.87015800 |
| C | -0.36091800 | 1.91966200  | 0.01003700  |
| C | 0.18554500  | 2.78220200  | -0.94392900 |
| C | 0.30225300  | 4.14010800  | -0.66725100 |
| C | -0.11725500 | 4.64849800  | 0.55606500  |
| C | -0.67124000 | 3.79647400  | 1.50718500  |
| C | -0.80478700 | 2.44385500  | 1.23027800  |
| C | -5.72019200 | -2.02423600 | 0.48978000  |
| C | 2.55052900  | -1.40030000 | 1.00231100  |
| C | 3.55365400  | -1.93297000 | 1.80264600  |
| C | 4.88723400  | -1.67713900 | 1.50443500  |
| C | 5.21966700  | -0.88747000 | 0.40602800  |
| C | 4.21924900  | -0.35463200 | -0.39192000 |
| H | -5.16513400 | 0.36882300  | -0.63652000 |
| H | -3.28011600 | -2.92867500 | 1.34026500  |
| H | -1.13805100 | -1.68570800 | 1.28142400  |
| H | -2.98251600 | 1.49739200  | -0.89696600 |
| H | 0.51587600  | 2.38414400  | -1.89338200 |
| H | 0.72381300  | 4.80124000  | -1.41457900 |
| H | -0.01876800 | 5.70651200  | 0.76756300  |
| H | -1.00272100 | 4.18690300  | 2.46172100  |
| H | -1.24656300 | 1.78039700  | 1.96589200  |
| H | -6.14194500 | -2.23287300 | -0.49642800 |
| H | -5.65448700 | -2.96397600 | 1.03731500  |
| H | -6.41666500 | -1.36594100 | 1.01398600  |
| H | 1.51178700  | -1.60105000 | 1.23814600  |
| H | 3.29607300  | -2.54873000 | 2.65560100  |

|   |            |             |             |
|---|------------|-------------|-------------|
| H | 5.66961700 | -2.09488700 | 2.12698300  |
| H | 6.25943900 | -0.69163400 | 0.17393300  |
| H | 4.44940500 | 0.26082900  | -1.25272200 |

### TS9b-11b

E= -1112.1017781 a.u., im. freq.= 423.95i

0 2

|   |             |             |             |
|---|-------------|-------------|-------------|
| C | 3.84367500  | -1.60159800 | -0.62209100 |
| C | 4.54925600  | -1.21861100 | 0.51746100  |
| C | 3.94913700  | -0.30982700 | 1.39236300  |
| C | 2.68322500  | 0.19507500  | 1.14058800  |
| C | 1.97027000  | -0.21645200 | 0.01148400  |
| C | 2.56899500  | -1.11228800 | -0.87598500 |
| C | 0.61723400  | 0.33712400  | -0.24603400 |
| C | -0.42265400 | -0.40990900 | -0.61336000 |
| C | 5.91472800  | -1.78135600 | 0.81080500  |
| C | 0.44335000  | 1.81140900  | -0.11012700 |
| C | -0.66489900 | 2.34739200  | 0.54981600  |
| C | -0.80728200 | 3.72330600  | 0.67361500  |
| C | 0.15154800  | 4.57471100  | 0.13594700  |
| C | 1.26110000  | 4.04635700  | -0.51771800 |
| C | 1.41228500  | 2.67197000  | -0.63398100 |
| C | -1.83089000 | -0.06393300 | -0.98519100 |
| C | -0.23236600 | -2.20401100 | -0.95866300 |
| O | -0.31853300 | -2.45995000 | -2.10992400 |
| O | -0.09167100 | -2.57053300 | 0.18002000  |
| C | -2.94101700 | -0.53757500 | -0.11384800 |
| O | -2.00632800 | 0.57488300  | -1.99184200 |
| C | -2.70128000 | -1.08218100 | 1.14846700  |
| C | -3.77239200 | -1.47567100 | 1.94210200  |
| C | -5.07408800 | -1.32940600 | 1.47576300  |

|   |             |             |             |
|---|-------------|-------------|-------------|
| C | -5.31343400 | -0.78467400 | 0.21530600  |
| C | -4.24961100 | -0.38548300 | -0.57784600 |
| H | 4.29959600  | -2.28863400 | -1.32662900 |
| H | 4.48593600  | 0.00894800  | 2.27955000  |
| H | 2.23553300  | 0.90933200  | 1.82264600  |
| H | 2.04739100  | -1.40446600 | -1.78040900 |
| H | 5.83670300  | -2.64259500 | 1.48008700  |
| H | 6.40934800  | -2.11342200 | -0.10265100 |
| H | 6.55054100  | -1.04016400 | 1.29757500  |
| H | -1.40516400 | 1.68487000  | 0.98538300  |
| H | -1.66599100 | 4.12961200  | 1.19389000  |
| H | 0.03748900  | 5.64791600  | 0.22965800  |
| H | 2.01017500  | 4.70701800  | -0.93692200 |
| H | 2.27681700  | 2.25517000  | -1.13766300 |
| H | -1.68463500 | -1.20479500 | 1.50313900  |
| H | -3.59006900 | -1.89970600 | 2.92168500  |
| H | -5.90665900 | -1.64185400 | 2.09498900  |
| H | -6.32910600 | -0.67411000 | -0.14415300 |
| H | -4.40500400 | 0.04548400  | -1.55944900 |

### TS11b-12b

E= -1268.410944 a.u., im. freq.= 408.94i

0 3

|   |             |             |             |
|---|-------------|-------------|-------------|
| C | -2.95320300 | -2.67307100 | 1.19232400  |
| C | -3.82583900 | -2.87376200 | 0.12472100  |
| C | -3.87326500 | -1.90492600 | -0.88160800 |
| C | -3.07574600 | -0.77297600 | -0.82373800 |
| C | -2.19188100 | -0.58565200 | 0.24481300  |
| C | -2.14304400 | -1.54599400 | 1.25694400  |
| C | -1.30088600 | 0.61373200  | 0.27180900  |
| C | -0.04463700 | 0.43824000  | 0.64257900  |

|   |             |             |             |
|---|-------------|-------------|-------------|
| C | -4.71975500 | -4.08407600 | 0.06269100  |
| C | -1.88048300 | 1.91635400  | -0.15501600 |
| C | -1.24443700 | 2.73259600  | -1.09114800 |
| C | -1.81881700 | 3.93930600  | -1.47343900 |
| C | -3.03047100 | 4.34164500  | -0.92401200 |
| C | -3.67481300 | 3.52726200  | 0.00238400  |
| C | -3.10846400 | 2.31666100  | 0.37731600  |
| C | 1.17428100  | 2.09421100  | 0.78541000  |
| C | 2.48395300  | 1.55599800  | 0.30125800  |
| O | 0.91797000  | 2.40666200  | 1.91832700  |
| C | 0.84034800  | -0.59616300 | 1.19020300  |
| O | 1.10266100  | -0.63315200 | 2.37548300  |
| C | 2.65628800  | 1.21715300  | -1.04012400 |
| C | 3.87313200  | 0.71205600  | -1.47385200 |
| C | 4.92468600  | 0.56342800  | -0.57235200 |
| C | 4.75640900  | 0.91508500  | 0.76393000  |
| C | 3.53501000  | 1.40572200  | 1.20837900  |
| C | 1.50815600  | -1.49771200 | 0.19937100  |
| C | 2.69897600  | -2.11219200 | 0.58469700  |
| C | 3.39465500  | -2.90193300 | -0.32005400 |
| C | 2.89128400  | -3.09795300 | -1.60314000 |
| C | 1.68968800  | -2.50570600 | -1.98105600 |
| C | 1.00125200  | -1.69838600 | -1.08489000 |
| H | -2.90784000 | -3.40683500 | 1.98966100  |
| H | -4.54744100 | -2.04236800 | -1.72074900 |
| H | -3.12998300 | -0.02609800 | -1.60815600 |
| H | -1.48262300 | -1.39882200 | 2.10384500  |
| H | -5.74803700 | -3.81715700 | 0.32119800  |
| H | -4.73282200 | -4.51000600 | -0.94237900 |
| H | -4.38844900 | -4.85567400 | 0.75808300  |
| H | -0.30370000 | 2.41491600  | -1.52141400 |

|   |             |             |             |
|---|-------------|-------------|-------------|
| H | -1.31767800 | 4.56490400  | -2.20215200 |
| H | -3.47460000 | 5.28447900  | -1.21988400 |
| H | -4.62002400 | 3.83522400  | 0.43277100  |
| H | -3.60969100 | 1.67644600  | 1.09456300  |
| H | 1.82413000  | 1.32166900  | -1.72742100 |
| H | 4.00102000  | 0.42667600  | -2.51089100 |
| H | 5.87492000  | 0.16905700  | -0.91218700 |
| H | 5.57531200  | 0.79691800  | 1.46371600  |
| H | 3.37194500  | 1.65896800  | 2.24899700  |
| H | 3.06888600  | -1.93787900 | 1.58786000  |
| H | 4.33037800  | -3.36319500 | -0.02766100 |
| H | 3.43379500  | -3.71651900 | -2.30852300 |
| H | 1.29239800  | -2.67025100 | -2.97536700 |
| H | 0.07078700  | -1.22622500 | -1.38078500 |

## 2c

E= -231.7452977 a.u., number of negative frequencies = 0

0 2

|   |             |             |             |
|---|-------------|-------------|-------------|
| C | 0.20004900  | 1.18521300  | -0.22572500 |
| C | -1.08986200 | 0.48043800  | 0.18716800  |
| O | -0.86244300 | -0.89323200 | -0.12877100 |
| C | 0.46956100  | -1.14539600 | 0.04724200  |
| C | 1.26030000  | 0.12952800  | 0.14227000  |
| H | 0.19715400  | 1.35420500  | -1.30432800 |
| H | 0.34008700  | 2.14009800  | 0.28004600  |
| H | -1.26594600 | 0.57663400  | 1.26466000  |
| H | -1.97684200 | 0.80431100  | -0.35453000 |
| H | 0.80582800  | -2.07278700 | -0.39338900 |
| H | 1.63555700  | 0.29740600  | 1.15898300  |
| H | 2.12342400  | 0.14729400  | -0.52699800 |

**3c**

E= -998.9965689 a.u., number of negative frequencies = 0

0 2

|   |             |             |             |
|---|-------------|-------------|-------------|
| C | 5.70899500  | -0.45334700 | -0.09724000 |
| C | 5.11022300  | 0.71511600  | -0.56351000 |
| C | 3.73961200  | 0.91352300  | -0.44774500 |
| C | 2.95804300  | -0.06443900 | 0.14552900  |
| C | 3.52469600  | -1.23725200 | 0.62710300  |
| C | 4.89493900  | -1.41817800 | 0.49870400  |
| O | 1.60802700  | 0.23027000  | 0.29813000  |
| C | 0.65999200  | -0.69180800 | -0.03898300 |
| O | 0.90448700  | -1.78412800 | -0.45279200 |
| C | -0.69761200 | -0.10860400 | 0.18781700  |
| C | -1.75118200 | -0.83178200 | -0.10183500 |
| C | 7.18986700  | -0.68636500 | -0.25074700 |
| C | -0.79973400 | 1.31092200  | 0.74998000  |
| C | -3.14274100 | -1.00332800 | -0.14418800 |
| C | -3.86833500 | -1.27399400 | 1.03674500  |
| C | -5.23727600 | -1.46194400 | 0.98205900  |
| C | -5.91430200 | -1.38930400 | -0.23538200 |
| C | -5.20801800 | -1.12613000 | -1.40796000 |
| C | -3.83688900 | -0.94124000 | -1.37264400 |
| O | -2.13290200 | 1.60094100  | 1.12886000  |
| C | -2.71798500 | 2.41463500  | 0.12276900  |
| C | -1.58682700 | 3.34294300  | -0.30399400 |
| C | -0.38289300 | 2.39047700  | -0.28571300 |
| H | 5.72185400  | 1.48297500  | -1.02448300 |
| H | 3.26650900  | 1.81972200  | -0.80567100 |
| H | 2.90335200  | -1.99562400 | 1.08201300  |
| H | 5.34209300  | -2.33328300 | 0.87219800  |
| H | 7.72167300  | 0.25179400  | -0.41371700 |



|   |             |             |             |
|---|-------------|-------------|-------------|
| H | 7.60660800  | -1.16526100 | 0.63708100  |
| H | 7.39245200  | -1.33865600 | -1.10446200 |
| H | -0.18452200 | 1.36392800  | 1.65021700  |
| H | -3.33748100 | -1.30937300 | 1.97928900  |
| H | -5.78630500 | -1.66039500 | 1.89470300  |
| H | -6.98651300 | -1.53786300 | -0.26959400 |
| H | -5.73165800 | -1.07048600 | -2.35475100 |
| H | -3.27982300 | -0.74934600 | -2.28188600 |
| H | -3.57525500 | 2.92131300  | 0.56419500  |
| H | -3.06377500 | 1.79691900  | -0.71740700 |
| H | -1.75130400 | 3.80220400  | -1.27891300 |
| H | -1.46310900 | 4.13257000  | 0.43967100  |
| H | 0.54750400  | 2.87845300  | 0.00017800  |
| H | -0.23462700 | 1.93433800  | -1.26683800 |

#### 4c

E= -998.9845357 a.u., number of negative frequencies = 0

0 2

|   |             |             |             |
|---|-------------|-------------|-------------|
| C | 5.92524200  | 0.13873100  | -0.00582000 |
| C | 5.33184800  | 1.00020200  | -0.92610600 |
| C | 3.96228400  | 1.23560100  | -0.90843200 |
| C | 3.17692200  | 0.60565100  | 0.04240200  |
| C | 3.73799200  | -0.25184400 | 0.97970100  |
| C | 5.10713500  | -0.47607100 | 0.94382600  |
| O | 1.82712600  | 0.94544900  | 0.05227600  |
| C | 0.88520500  | -0.02043700 | 0.14076100  |
| O | 1.11824200  | -1.19811600 | 0.22199500  |
| C | -0.44888100 | 0.56055400  | 0.13407600  |
| C | -1.66364600 | 0.08232900  | -0.09451200 |
| C | 7.40509500  | -0.14326200 | -0.04109200 |
| C | -2.84054800 | 0.97893600  | 0.02473200  |

|   |             |             |             |
|---|-------------|-------------|-------------|
| C | -1.82324400 | -1.39387600 | -0.44007700 |
| C | -4.10207600 | 0.50246100  | 0.39282000  |
| C | -5.16688300 | 1.37972900  | 0.55338600  |
| C | -4.99526800 | 2.74167100  | 0.33399000  |
| C | -3.74660400 | 3.22512800  | -0.04326300 |
| C | -2.67973200 | 2.35180000  | -0.19484400 |
| C | -1.96827500 | -2.29914500 | 0.79069900  |
| C | -2.70414100 | -3.49378700 | 0.18276100  |
| C | -3.64213200 | -2.80746800 | -0.81216400 |
| O | -2.97543100 | -1.62132000 | -1.23977600 |
| H | 5.94683000  | 1.49659600  | -1.66869000 |
| H | 3.49226600  | 1.90760700  | -1.61535600 |
| H | 3.11429000  | -0.73871200 | 1.71616700  |
| H | 5.55049200  | -1.14537500 | 1.67345800  |
| H | 7.93828300  | 0.61994500  | -0.60903000 |
| H | 7.82343100  | -0.17336600 | 0.96664200  |
| H | 7.60371500  | -1.11028900 | -0.51086800 |
| H | -0.93663000 | -1.70422900 | -1.00002900 |
| H | -4.25559300 | -0.55340700 | 0.56366500  |
| H | -6.13652300 | 0.99554100  | 0.84660500  |
| H | -5.83040000 | 3.42169900  | 0.45143500  |
| H | -3.60461500 | 4.28368300  | -0.22463800 |
| H | -1.70862100 | 2.72450800  | -0.50020300 |
| H | -0.99295900 | -2.53723900 | 1.21183300  |
| H | -2.57532600 | -1.81195100 | 1.55870700  |
| H | -3.23899500 | -4.09485200 | 0.91797900  |
| H | -1.99640400 | -4.13749200 | -0.34459400 |
| H | -3.86184000 | -3.41755700 | -1.68950600 |
| H | -4.59265800 | -2.53462000 | -0.33660500 |

5c

E= -999.0260855 a.u., number of negative frequencies = 0

0 2

|   |             |             |             |
|---|-------------|-------------|-------------|
| C | -3.84499500 | -1.22104300 | -0.09450000 |
| C | -3.10094900 | -0.99552800 | -1.29006200 |
| C | -1.74917000 | -0.98180100 | -1.30834100 |
| C | -0.93087700 | -1.16275000 | -0.06734600 |
| C | -1.76964400 | -1.43906400 | 1.14562800  |
| C | -3.12726800 | -1.46558500 | 1.10181600  |
| O | -0.03840800 | -2.29153700 | -0.24836700 |
| C | 1.25424300  | -1.91135100 | -0.09719500 |
| C | 1.28679000  | -0.45533000 | 0.19816300  |
| C | 0.03374600  | 0.01057600  | 0.13968500  |
| O | 2.16706800  | -2.67623700 | -0.21882700 |
| C | -5.34169600 | -1.23601300 | -0.13294000 |
| C | -0.41037800 | 1.41401000  | 0.13434100  |
| C | 0.33491400  | 2.35178400  | -0.59363200 |
| C | -0.06847600 | 3.67944500  | -0.64622600 |
| C | -1.21901900 | 4.08796100  | 0.02006700  |
| C | -1.97182700 | 3.15987700  | 0.73154800  |
| C | -1.57761700 | 1.82910000  | 0.78325900  |
| C | 2.56786200  | 0.30219500  | 0.39437800  |
| C | 3.59469200  | -0.39489100 | 1.31718900  |
| C | 4.90566900  | -0.26145200 | 0.53134500  |
| C | 4.39870500  | -0.29841600 | -0.90413100 |
| O | 3.20455200  | 0.48098500  | -0.87438800 |
| H | -3.64628900 | -0.84473500 | -2.21641900 |
| H | -1.19338200 | -0.82666800 | -2.22618700 |
| H | -1.22445200 | -1.64101600 | 2.06079400  |
| H | -3.68352600 | -1.68557200 | 2.00741500  |
| H | -5.73253300 | -0.28680100 | -0.51213200 |
| H | -5.70755300 | -2.02213000 | -0.80097300 |

|   |             |             |             |
|---|-------------|-------------|-------------|
| H | -5.76495400 | -1.40816200 | 0.85686900  |
| H | 1.21787900  | 2.02540000  | -1.13360300 |
| H | 0.51369900  | 4.39378000  | -1.21569400 |
| H | -1.53230400 | 5.12426900  | -0.02182700 |
| H | -2.87217900 | 3.47217000  | 1.24685200  |
| H | -2.16924200 | 1.11220000  | 1.33800100  |
| H | 2.32536500  | 1.29606500  | 0.77694000  |
| H | 3.63266900  | 0.08316600  | 2.29555000  |
| H | 3.34592100  | -1.44662500 | 1.44875900  |
| H | 5.61391400  | -1.05949900 | 0.75410100  |
| H | 5.38160000  | 0.70131000  | 0.73175600  |
| H | 5.07219100  | 0.16139700  | -1.62712800 |
| H | 4.16924000  | -1.32459100 | -1.20869200 |

### 6c

E= -999.017163 a.u., number of negative frequencies = 0

0 2

|   |             |             |             |
|---|-------------|-------------|-------------|
| C | 3.52104500  | 1.02906100  | 0.23128200  |
| C | 4.09393300  | -0.19817700 | 0.68154000  |
| C | 3.42021900  | -1.41519000 | 0.47285100  |
| C | 2.23963500  | -1.43434100 | -0.19856000 |
| C | 1.60182700  | -0.23146200 | -0.79945000 |
| C | 2.33998600  | 1.02629400  | -0.43694700 |
| O | 1.60073400  | -2.63122200 | -0.38304200 |
| C | 0.23597800  | -2.69119100 | -0.42627900 |
| O | -0.27605100 | -3.76550000 | -0.53792300 |
| C | -0.51998400 | -1.41198100 | -0.29659000 |
| C | 0.10693600  | -0.23835500 | -0.44870800 |
| C | 4.25054800  | 2.31480300  | 0.52303700  |
| C | -1.99519800 | -1.59382200 | -0.00392800 |
| C | -0.56743100 | 1.08267000  | -0.33911600 |

|   |             |             |             |
|---|-------------|-------------|-------------|
| C | -0.49631300 | 1.79253300  | 0.85977400  |
| C | -1.08612000 | 3.04881300  | 0.96850300  |
| C | -1.73789900 | 3.60755500  | -0.12420900 |
| C | -1.79833400 | 2.90712100  | -1.32660900 |
| C | -1.21459200 | 1.65165000  | -1.43607400 |
| C | -2.34938000 | -1.40895400 | 1.48331200  |
| C | -3.77627600 | -0.86580000 | 1.40075800  |
| C | -3.67393300 | 0.02444300  | 0.16616200  |
| O | -2.80452300 | -0.66771800 | -0.72441000 |
| H | 5.03521300  | -0.18608900 | 1.21625500  |
| H | 3.81134500  | -2.35156600 | 0.85163700  |
| H | 1.62922800  | -0.33991800 | -1.90299700 |
| H | 1.90924400  | 1.95949200  | -0.78140400 |
| H | 5.23802300  | 2.31083900  | 0.05482600  |
| H | 3.69715100  | 3.17691100  | 0.15083800  |
| H | 4.39822700  | 2.43815800  | 1.59874000  |
| H | -2.26728000 | -2.59992400 | -0.32961000 |
| H | 0.02829800  | 1.35880300  | 1.70441000  |
| H | -1.03196100 | 3.58899400  | 1.90608300  |
| H | -2.19759000 | 4.58506500  | -0.04169100 |
| H | -2.30926500 | 3.33730200  | -2.17967000 |
| H | -1.28921300 | 1.08797900  | -2.35779300 |
| H | -2.25716600 | -2.34122400 | 2.04024800  |
| H | -1.68915000 | -0.66390900 | 1.93443100  |
| H | -4.08135400 | -0.32073500 | 2.29422700  |
| H | -4.48467500 | -1.67867500 | 1.22373000  |
| H | -4.62499900 | 0.17819300  | -0.34472500 |
| H | -3.24323200 | 1.00180200  | 0.42097100  |

7c

E= -998.7549234 a.u., number of negative frequencies = 0

1 1

|   |             |             |             |
|---|-------------|-------------|-------------|
| C | 5.47934600  | -0.85734400 | 0.00746300  |
| C | 4.96068500  | -0.23773400 | 1.14287900  |
| C | 3.62856500  | 0.15684300  | 1.20107900  |
| C | 2.82092300  | -0.07848000 | 0.10574500  |
| C | 3.29542200  | -0.68641100 | -1.04529900 |
| C | 4.62733200  | -1.07283300 | -1.07936600 |
| O | 1.49386800  | 0.40181100  | 0.19150600  |
| C | 0.48153000  | -0.40718000 | -0.10586500 |
| O | 0.52126900  | -1.53400600 | -0.48399200 |
| C | -0.81842500 | 0.35500700  | 0.11791100  |
| C | -1.92588000 | -0.29812200 | 0.07941000  |
| C | 6.92235600  | -1.28071800 | -0.06365000 |
| C | -0.84985300 | 1.84602300  | 0.42501300  |
| C | -3.08561700 | -1.00236300 | 0.05811900  |
| C | -3.58447100 | -1.57371700 | 1.26693800  |
| C | -4.75510600 | -2.29285400 | 1.23376800  |
| C | -5.42983900 | -2.45247700 | 0.01620400  |
| C | -4.95466700 | -1.89973100 | -1.18086500 |
| C | -3.78836700 | -1.17335400 | -1.17200000 |
| C | -0.33338800 | 2.72956200  | -0.71338500 |
| C | -1.11831500 | 4.01481600  | -0.43652300 |
| C | -2.47443300 | 3.47017000  | 0.00275500  |
| O | -2.19534300 | 2.21312700  | 0.64793600  |
| H | 5.60380600  | -0.05880800 | 1.99660100  |
| H | 3.21947100  | 0.64139800  | 2.07861400  |
| H | 2.64232000  | -0.86463200 | -1.88888700 |
| H | 5.01405400  | -1.55335300 | -1.97116600 |
| H | 7.42759300  | -1.12642800 | 0.88933800  |
| H | 7.00409700  | -2.33717100 | -0.32651800 |
| H | 7.45470700  | -0.70820300 | -0.82661700 |

|   |             |             |             |
|---|-------------|-------------|-------------|
| H | -0.25259400 | 1.98667000  | 1.33399500  |
| H | -3.03107900 | -1.42565200 | 2.18579000  |
| H | -5.15485500 | -2.73506200 | 2.13665400  |
| H | -6.35116900 | -3.02421700 | -0.00083300 |
| H | -5.50413400 | -2.04745700 | -2.10109900 |
| H | -3.38410000 | -0.73241100 | -2.07456600 |
| H | 0.74753400  | 2.84792500  | -0.68536800 |
| H | -0.62149800 | 2.30523200  | -1.67935100 |
| H | -1.18892300 | 4.66234700  | -1.30916700 |
| H | -0.64878400 | 4.57491300  | 0.37445200  |
| H | -2.99256100 | 4.10992300  | 0.71549700  |
| H | -3.12903300 | 3.28292000  | -0.85295900 |

### 8c

E= -999.028493 a.u., number of negative frequencies = 0

0 2

|   |             |             |             |
|---|-------------|-------------|-------------|
| C | 3.79319300  | 0.79335100  | 0.32425700  |
| C | 4.26531500  | -0.54896800 | 0.10244200  |
| C | 3.38647500  | -1.50623300 | -0.25893900 |
| C | 1.95129700  | -1.20844400 | -0.53201600 |
| C | 1.50511800  | 0.15950400  | -0.11795800 |
| C | 2.44663400  | 1.11449700  | 0.23860500  |
| O | 1.16033200  | -2.23422100 | 0.09056800  |
| C | -0.18337200 | -2.07972400 | 0.09269100  |
| O | -0.87015500 | -3.01526600 | 0.40435500  |
| C | -0.73476100 | -0.73356400 | -0.21822200 |
| C | 0.08184200  | 0.36302100  | -0.15652300 |
| C | -2.23486800 | -0.63244700 | -0.34525600 |
| C | -0.45562600 | 1.74906900  | -0.08027900 |
| C | -0.02783000 | 2.72868900  | -0.97955700 |
| C | -0.52341700 | 4.02406200  | -0.89694700 |

|   |             |             |             |
|---|-------------|-------------|-------------|
| C | -1.44184900 | 4.35598700  | 0.09381700  |
| C | -1.86981000 | 3.38614600  | 0.99447200  |
| C | -1.38373900 | 2.08707400  | 0.90856300  |
| C | 5.72520700  | -0.84002700 | 0.32112000  |
| O | -2.83949400 | -0.81116100 | 0.94050900  |
| C | -3.73754300 | -1.91738000 | 0.90050500  |
| C | -4.19519800 | -1.99253100 | -0.55153300 |
| C | -2.90058800 | -1.64782800 | -1.29726300 |
| H | 4.50682000  | 1.55225200  | 0.62403500  |
| H | 3.69421000  | -2.53666500 | -0.39804800 |
| H | 1.77022800  | -1.30006500 | -1.61873800 |
| H | 2.11627600  | 2.11419600  | 0.49430400  |
| H | -2.47842900 | 0.37854100  | -0.67863600 |
| H | 0.68957400  | 2.46724200  | -1.74991700 |
| H | -0.19329200 | 4.77375300  | -1.60599800 |
| H | -1.82467400 | 5.36726500  | 0.16164400  |
| H | -2.58694300 | 3.63947400  | 1.76588800  |
| H | -1.73061800 | 1.31974900  | 1.59254500  |
| H | 6.34169600  | -0.24387000 | -0.35659000 |
| H | 6.01849700  | -0.58445300 | 1.34228000  |
| H | 5.94775600  | -1.89321800 | 0.15183400  |
| H | -4.54550900 | -1.71240200 | 1.60385100  |
| H | -3.21048000 | -2.82909100 | 1.19375500  |
| H | -4.59334700 | -2.97064100 | -0.82221700 |
| H | -4.96035800 | -1.23566000 | -0.74199500 |
| H | -3.07676500 | -1.20656200 | -2.27834300 |
| H | -2.28897600 | -2.54018000 | -1.41500200 |

**9c**

E= -999.0020252 a.u., number of negative frequencies = 0

0 2



|   |             |             |             |
|---|-------------|-------------|-------------|
| C | 3.70245700  | -0.10982400 | -1.03662100 |
| C | 4.22200500  | -0.89402200 | 0.00302900  |
| C | 3.36769000  | -1.28552600 | 1.02707300  |
| C | 2.02225700  | -0.92903900 | 1.01081600  |
| C | 1.50619000  | -0.16380700 | -0.03952400 |
| C | 2.37228900  | 0.26561500  | -1.05225800 |
| C | 0.07942400  | 0.25534200  | -0.03024800 |
| C | -0.92926600 | -0.63923500 | -0.05377900 |
| C | 5.67203800  | -1.29791600 | -0.00674600 |
| C | -0.14444800 | 1.72273300  | 0.02648100  |
| C | -1.08038000 | 2.34093000  | -0.80731900 |
| C | -1.27108500 | 3.71670800  | -0.75837800 |
| C | -0.52959100 | 4.49103300  | 0.12656100  |
| C | 0.41541300  | 3.88691000  | 0.95078600  |
| C | 0.61773100  | 2.51515900  | 0.89138300  |
| C | -2.38015800 | -0.32243200 | 0.24637900  |
| C | -0.67005600 | -2.07453200 | -0.37690200 |
| O | -1.52765100 | -2.86933100 | -0.69809400 |
| O | 0.56927600  | -2.51914400 | -0.38871300 |
| C | -3.37502800 | -0.48623200 | -0.92148300 |
| C | -4.60438000 | -1.07287800 | -0.22049600 |
| O | -2.81355800 | -1.20408700 | 1.28200000  |
| C | -3.95913700 | -1.93786400 | 0.85654200  |
| H | 4.36058900  | 0.21047600  | -1.83764900 |
| H | 3.75277200  | -1.87841600 | 1.84909400  |
| H | 1.36530000  | -1.23153700 | 1.81823000  |
| H | 1.98610800  | 0.88581300  | -1.85349000 |
| H | 5.86340200  | -2.01555900 | -0.80870400 |
| H | 6.31759900  | -0.43376100 | -0.17734400 |
| H | 5.96029500  | -1.76156500 | 0.93674600  |
| H | -1.63825600 | 1.73733800  | -1.51392700 |

|   |             |             |             |
|---|-------------|-------------|-------------|
| H | -1.99386300 | 4.18383800  | -1.41641000 |
| H | -0.67947100 | 5.56316800  | 0.16730600  |
| H | 1.00026000  | 4.48759900  | 1.63679100  |
| H | 1.36283600  | 2.04557200  | 1.52371100  |
| H | -2.43299600 | 0.69404000  | 0.64417400  |
| H | -3.58151000 | 0.46805000  | -1.40741000 |
| H | -2.98888100 | -1.18594900 | -1.66162100 |
| H | -5.24631900 | -1.64160100 | -0.89335200 |
| H | -5.19543600 | -0.27769200 | 0.24097300  |
| H | -4.59480700 | -2.09265600 | 1.72919600  |
| H | -3.64594800 | -2.90340500 | 0.45035700  |

### 10c

E= -998.4913494 a.u., number of negative frequencies = 0

0 1

|   |             |             |             |
|---|-------------|-------------|-------------|
| C | -3.85809600 | 0.63851800  | -0.04812000 |
| C | -4.23495700 | -0.71314800 | 0.00115100  |
| C | -3.24423100 | -1.68224100 | 0.01572400  |
| C | -1.90367900 | -1.30824200 | -0.01227400 |
| C | -1.51522400 | 0.03123200  | -0.04457300 |
| C | -2.52781400 | 1.00400800  | -0.07133100 |
| O | -0.98945800 | -2.31110800 | -0.02057100 |
| C | 0.36461900  | -2.08291400 | -0.09468400 |
| O | 1.07930700  | -3.03575000 | -0.20598700 |
| C | 0.81256400  | -0.67893500 | -0.04471200 |
| C | -0.08978800 | 0.32920300  | -0.04247500 |
| C | 2.30376800  | -0.47858000 | 0.04151100  |
| C | 0.32836100  | 1.75910500  | -0.03431500 |
| C | 0.17642900  | 2.52655400  | 1.12084300  |
| C | 0.56487900  | 3.86093100  | 1.12892800  |
| C | 1.09621000  | 4.44087800  | -0.01870100 |

|   |             |             |             |
|---|-------------|-------------|-------------|
| C | 1.24211000  | 3.68168400  | -1.17440100 |
| C | 0.86072600  | 2.34442700  | -1.18261600 |
| C | -5.69160200 | -1.09108700 | 0.03542200  |
| O | 2.75674900  | -1.10674400 | 1.23430700  |
| C | 4.05378900  | -1.62471800 | 0.99314500  |
| C | 4.01694900  | -2.13440100 | -0.44454300 |
| C | 3.12107200  | -1.09139500 | -1.12998600 |
| H | -4.62678900 | 1.40296200  | -0.07019500 |
| H | -3.48169500 | -2.73891100 | 0.04352800  |
| H | -2.25037400 | 2.05022600  | -0.11322400 |
| H | 2.50743400  | 0.59366100  | 0.10954400  |
| H | -0.23624300 | 2.06855200  | 2.01293600  |
| H | 0.45450800  | 4.44755100  | 2.03296300  |
| H | 1.39680900  | 5.48156700  | -0.01134400 |
| H | 1.65514000  | 4.12907400  | -2.07043400 |
| H | 0.97437300  | 1.74561600  | -2.07982400 |
| H | -5.82168900 | -2.17290200 | 0.01643700  |
| H | -6.16692800 | -0.70551100 | 0.94061900  |
| H | -6.22077100 | -0.66618400 | -0.82049600 |
| H | 4.24242800  | -2.40060700 | 1.73427200  |
| H | 4.80481700  | -0.82982800 | 1.10907100  |
| H | 5.00932100  | -2.19994100 | -0.89195400 |
| H | 3.53632700  | -3.11039300 | -0.47528500 |
| H | 3.71445000  | -0.30860300 | -1.60658400 |
| H | 2.47958800  | -1.54278000 | -1.88597200 |

### 11c

E= -810.4402899 a.u., number of negative frequencies = 0

0 2

|   |             |             |            |
|---|-------------|-------------|------------|
| C | -3.39910100 | -1.62385900 | 0.26560600 |
| C | -4.27937000 | -0.55950500 | 0.04746700 |

|   |             |             |             |
|---|-------------|-------------|-------------|
| C | -3.73706100 | 0.67815400  | -0.28538300 |
| C | -2.36150100 | 0.85586300  | -0.39590000 |
| C | -1.48615100 | -0.20789200 | -0.17650800 |
| C | -2.02938500 | -1.45383800 | 0.15946600  |
| C | -0.01462900 | -0.03913700 | -0.32691300 |
| C | 0.76761200  | -1.06718500 | -0.60681200 |
| C | -5.76655000 | -0.75715100 | 0.18376100  |
| C | 0.58395300  | 1.31932700  | -0.14118800 |
| C | 0.27962900  | 2.07800200  | 0.99328500  |
| C | 0.88738600  | 3.30947000  | 1.20016800  |
| C | 1.79924700  | 3.80582500  | 0.27245800  |
| C | 2.09678200  | 3.06472400  | -0.86527200 |
| C | 1.49188800  | 1.82935000  | -1.07014300 |
| C | 2.18723200  | -1.43107800 | -0.81780400 |
| O | 2.36085100  | -2.84068200 | -0.66257500 |
| C | 2.83092100  | -3.06411600 | 0.65518700  |
| C | 3.85279600  | -1.95384400 | 0.86986600  |
| C | 3.14646900  | -0.75767800 | 0.21527800  |
| H | -3.79872600 | -2.59813300 | 0.52893800  |
| H | -4.39875300 | 1.51868200  | -0.46636500 |
| H | -1.96646500 | 1.82851700  | -0.66597900 |
| H | -1.35909300 | -2.28776800 | 0.33800900  |
| H | -6.03599600 | -0.98165000 | 1.21907200  |
| H | -6.31287800 | 0.13619700  | -0.12049400 |
| H | -6.10794400 | -1.59182100 | -0.43271100 |
| H | -0.43208500 | 1.69041900  | 1.71397600  |
| H | 0.65033900  | 3.88375400  | 2.08799300  |
| H | 2.27028900  | 4.76791500  | 0.43415300  |
| H | 2.79623500  | 3.45028600  | -1.59762200 |
| H | 1.71351600  | 1.25402800  | -1.96267500 |
| H | 2.47729800  | -1.20419700 | -1.84743300 |

|   |            |             |             |
|---|------------|-------------|-------------|
| H | 3.24167500 | -4.07208700 | 0.69599600  |
| H | 2.00684000 | -2.98081000 | 1.37770500  |
| H | 4.08956900 | -1.77952600 | 1.91972900  |
| H | 4.77272300 | -2.20089600 | 0.33673600  |
| H | 3.83358500 | -0.06549800 | -0.27006700 |
| H | 2.57207000 | -0.19456400 | 0.95192200  |

### 12c

E= -1042.3422448 a.u., number of negative frequencies = 0

0 1

|   |             |             |             |
|---|-------------|-------------|-------------|
| C | -3.34487400 | -1.70350700 | 0.79284200  |
| C | -4.31572400 | -1.21095800 | -0.07647800 |
| C | -3.96623600 | -0.15672300 | -0.92377200 |
| C | -2.69285900 | 0.39090500  | -0.89607300 |
| C | -1.71456400 | -0.11672500 | -0.03439800 |
| C | -2.06210300 | -1.16707300 | 0.81839800  |
| C | -0.35348600 | 0.49216000  | 0.00661400  |
| C | 0.78094300  | -0.24109600 | 0.00218600  |
| C | -5.71345900 | -1.77331200 | -0.08973200 |
| C | -0.35238400 | 1.98421600  | 0.05362900  |
| C | 0.45563800  | 2.72873300  | -0.81179600 |
| C | 0.42362100  | 4.11855100  | -0.78449400 |
| C | -0.41432000 | 4.78309600  | 0.10407500  |
| C | -1.22771400 | 4.05046800  | 0.96346000  |
| C | -1.20534100 | 2.66240600  | 0.93003400  |
| C | 0.73820900  | -1.72277300 | -0.28776900 |
| C | 2.11619900  | 0.40483100  | 0.28716600  |
| O | 2.86573100  | 0.56092800  | -0.93056600 |
| C | 4.26115100  | 0.43812100  | -0.65890000 |
| C | 1.78998600  | -2.28529800 | -1.24967600 |
| C | 1.74804800  | -3.76783600 | -0.87312400 |

|   |             |             |             |
|---|-------------|-------------|-------------|
| C | 4.39814500  | 0.32019900  | 0.86197600  |
| C | 3.06434300  | -0.32505900 | 1.24442200  |
| C | 1.58805500  | -3.69712400 | 0.64851900  |
| O | 0.90609600  | -2.47501400 | 0.92678200  |
| H | -3.59489500 | -2.51822400 | 1.46442800  |
| H | -4.70635900 | 0.24188900  | -1.61030200 |
| H | -2.44432900 | 1.21886400  | -1.55119100 |
| H | -1.31430200 | -1.56868800 | 1.49395600  |
| H | -5.75839300 | -2.73159000 | 0.42898500  |
| H | -6.41004400 | -1.09095000 | 0.40496600  |
| H | -6.06752800 | -1.92018800 | -1.11209400 |
| H | 1.11541400  | 2.20666400  | -1.49645200 |
| H | 1.05275000  | 4.68247400  | -1.46308600 |
| H | -0.43886200 | 5.86621700  | 0.12333900  |
| H | -1.88508000 | 4.56159900  | 1.65685700  |
| H | -1.85058200 | 2.09078600  | 1.58810600  |
| H | -0.24336600 | -1.96526600 | -0.70548100 |
| H | 1.93780700  | 1.39931100  | 0.70670000  |
| H | 4.78253400  | 1.30535000  | -1.06922400 |
| H | 4.63991600  | -0.46074400 | -1.16033400 |
| H | 1.52893100  | -2.08345800 | -2.28825600 |
| H | 2.77664900  | -1.86369100 | -1.06263200 |
| H | 2.63863900  | -4.31942800 | -1.17492900 |
| H | 0.87586300  | -4.24639900 | -1.32513300 |
| H | 5.26738800  | -0.26664900 | 1.15946800  |
| H | 4.47978600  | 1.31161500  | 1.31412100  |
| H | 2.77810100  | -0.16968100 | 2.28435000  |
| H | 3.08245300  | -1.39782800 | 1.05696800  |
| H | 1.01082400  | -4.52926400 | 1.05681500  |
| H | 2.56441800  | -3.67723100 | 1.14766600  |

**12cH**

E= -811.1196046 a.u., number of negative frequencies = 0

0 1

|   |             |             |             |
|---|-------------|-------------|-------------|
| C | -3.46427200 | -1.64521400 | 0.44365400  |
| C | -4.33132000 | -0.61691100 | 0.06671900  |
| C | -3.77215100 | 0.56408700  | -0.41500100 |
| C | -2.39462000 | 0.71631000  | -0.52195600 |
| C | -1.52871800 | -0.31861700 | -0.16168500 |
| C | -2.09006400 | -1.49983400 | 0.33750000  |
| C | -0.05810300 | -0.16067500 | -0.31106900 |
| C | -5.82233500 | -0.78394800 | 0.20322400  |
| C | 0.49882200  | 1.21108600  | -0.12912600 |
| C | 0.30947800  | 1.89517400  | 1.07431800  |
| C | 0.86993800  | 3.15100600  | 1.26817100  |
| C | 1.60901400  | 3.75121300  | 0.25234000  |
| C | 1.77687300  | 3.09171200  | -0.96001000 |
| C | 1.22433800  | 1.82895900  | -1.14846000 |
| C | 2.24318600  | -1.19370300 | -0.69637200 |
| O | 2.70460100  | -2.54676100 | -0.78406400 |
| C | 3.43036300  | -2.86960900 | 0.39115600  |
| C | 4.09655500  | -1.56253300 | 0.79828300  |
| C | 2.96940900  | -0.56461000 | 0.51972300  |
| H | -3.87542200 | -2.56919300 | 0.83799500  |
| H | -4.42348400 | 1.37918600  | -0.71246700 |
| H | -1.98445200 | 1.64617400  | -0.89993900 |
| H | -1.43824500 | -2.30215300 | 0.66364200  |
| H | -6.11190400 | -0.84960400 | 1.25524300  |
| H | -6.35572300 | 0.05710200  | -0.24085300 |
| H | -6.15974000 | -1.69923800 | -0.28819100 |
| H | -0.27317700 | 1.42755500  | 1.86086300  |
| H | 0.72913800  | 3.66444000  | 2.21196500  |

|   |            |             |             |
|---|------------|-------------|-------------|
| H | 2.04310200 | 4.73237500  | 0.40289600  |
| H | 2.33562700 | 3.56093800  | -1.76121100 |
| H | 1.34688100 | 1.31492500  | -2.09551400 |
| H | 2.56147200 | -0.70415900 | -1.62232000 |
| H | 4.12619900 | -3.67155900 | 0.14468800  |
| H | 2.75078700 | -3.21896300 | 1.18102700  |
| H | 4.42936000 | -1.55101500 | 1.83655600  |
| H | 4.95466200 | -1.36933600 | 0.15029000  |
| H | 3.31904800 | 0.44634400  | 0.31254500  |
| H | 2.28647200 | -0.51388600 | 1.37098600  |
| C | 0.73523100 | -1.19947900 | -0.60134200 |
| H | 0.29285400 | -2.17233900 | -0.79609600 |

### 13c

E= -998.4927589 a.u., number of negative frequencies = 0

0 1

|   |             |             |             |
|---|-------------|-------------|-------------|
| C | 3.73647500  | 0.96704400  | 0.06086600  |
| C | 4.37472200  | -0.28256000 | 0.07498000  |
| C | 3.65216100  | -1.45954400 | 0.03366900  |
| C | 2.26336100  | -1.39919700 | -0.02341900 |
| C | 1.59032300  | -0.17850900 | -0.03971600 |
| C | 2.35316200  | 1.00011600  | 0.00419500  |
| O | 1.59328000  | -2.58232300 | -0.05417800 |
| C | 0.22782300  | -2.64950400 | -0.10669500 |
| O | -0.28487200 | -3.73230700 | -0.05912600 |
| C | -0.51603000 | -1.37963400 | -0.19970200 |
| C | 0.13372000  | -0.19658500 | -0.11973600 |
| C | -2.01202500 | -1.56505700 | -0.30452300 |
| C | -0.57081200 | 1.11752800  | -0.06492600 |
| C | -0.93812800 | 1.79347800  | -1.22793000 |
| C | -1.55914500 | 3.03241900  | -1.14550200 |



|   |             |             |             |
|---|-------------|-------------|-------------|
| C | -1.81207700 | 3.61148900  | 0.09649600  |
| C | -1.43809800 | 2.94654400  | 1.25722800  |
| C | -0.81478000 | 1.70347400  | 1.17608900  |
| C | 4.55108700  | 2.23397100  | 0.10464600  |
| C | -2.72565900 | -1.54520500 | 1.06058500  |
| C | -4.09299000 | -0.97030700 | 0.68863000  |
| C | -3.69908800 | 0.04954800  | -0.37581100 |
| O | -2.62726300 | -0.55316600 | -1.09434100 |
| H | 5.45790700  | -0.32485900 | 0.11909400  |
| H | 4.12988800  | -2.43079600 | 0.04476600  |
| H | 1.83793000  | 1.95396300  | -0.01132800 |
| H | -2.18474000 | -2.52769200 | -0.79180400 |
| H | -0.76263000 | 1.32646200  | -2.18898400 |
| H | -1.85186400 | 3.54703500  | -2.05287500 |
| H | -2.29815000 | 4.57786500  | 0.15590500  |
| H | -1.62803800 | 3.39133000  | 2.22669300  |
| H | -0.51105300 | 1.18458800  | 2.07926600  |
| H | 3.90921600  | 3.11483500  | 0.08464300  |
| H | 5.15763500  | 2.27647000  | 1.01238800  |
| H | 5.23062600  | 2.28985900  | -0.74901600 |
| H | -2.75819500 | -2.53753500 | 1.50877000  |
| H | -2.20657700 | -0.86726900 | 1.74321700  |
| H | -4.61564500 | -0.52229900 | 1.53396100  |
| H | -4.72693600 | -1.74620100 | 0.25273900  |
| H | -4.49569000 | 0.27326800  | -1.08609900 |
| H | -3.35683500 | 0.98629900  | 0.08328700  |

#### 14c

E= -998.7886545 a.u., number of negative frequencies = 0

1 1

|   |            |             |            |
|---|------------|-------------|------------|
| C | 3.82913700 | -0.67908800 | 0.00066300 |
|---|------------|-------------|------------|

|   |             |             |             |
|---|-------------|-------------|-------------|
| C | 3.67175000  | -2.07430400 | 0.32150100  |
| C | 2.48417900  | -2.75485200 | 0.25090300  |
| C | 1.33875200  | -2.05446700 | -0.14414200 |
| C | 1.41381800  | -0.64910000 | -0.59049800 |
| C | 2.73476500  | 0.00500700  | -0.39859900 |
| O | 0.20439400  | -2.67533600 | -0.15374300 |
| C | -1.06304700 | -1.97807800 | -0.35580900 |
| O | -1.96673200 | -2.66340600 | -0.65341800 |
| C | -1.01098500 | -0.52454000 | -0.11989900 |
| C | 0.14930200  | 0.13656200  | -0.23550000 |
| C | 5.18915100  | -0.05368200 | 0.13092000  |
| C | -2.33418800 | 0.08265300  | 0.29697800  |
| C | 0.24745700  | 1.60963800  | -0.11074500 |
| C | 0.96705800  | 2.18185500  | 0.94264500  |
| C | 1.02124700  | 3.56240700  | 1.07514000  |
| C | 0.37573200  | 4.37817900  | 0.14885700  |
| C | -0.33309200 | 3.81309600  | -0.90455600 |
| C | -0.40402300 | 2.43007100  | -1.03301000 |
| O | -2.87710700 | -0.74419600 | 1.31130300  |
| C | -4.21658700 | -1.12869700 | 0.96941000  |
| C | -4.67963000 | -0.08934100 | -0.04384800 |
| C | -3.38748400 | 0.17525000  | -0.82274800 |
| H | 4.55451000  | -2.61699300 | 0.64910200  |
| H | 2.39072900  | -3.79682500 | 0.52764500  |
| H | 1.37153800  | -0.75970900 | -1.70042100 |
| H | 2.79862900  | 1.05331300  | -0.66730300 |
| H | 5.56650100  | -0.16667700 | 1.14944900  |
| H | 5.89929200  | -0.53812900 | -0.54272900 |
| H | 5.15720900  | 1.00780100  | -0.10930500 |
| H | -2.13289600 | 1.07218400  | 0.71700000  |
| H | 1.45817700  | 1.54594000  | 1.67253600  |

|   |             |             |             |
|---|-------------|-------------|-------------|
| H | 1.56096600  | 4.00292500  | 1.90405600  |
| H | 0.42402500  | 5.45501800  | 0.25229300  |
| H | -0.83514300 | 4.44678900  | -1.62482500 |
| H | -0.95813300 | 1.98342900  | -1.85138900 |
| H | -4.80050400 | -1.13952100 | 1.88839100  |
| H | -4.20256900 | -2.13176600 | 0.53309000  |
| H | -5.48960100 | -0.44761600 | -0.67774000 |
| H | -5.00813700 | 0.81806800  | 0.46723800  |
| H | -3.36668200 | 1.14759500  | -1.31459400 |
| H | -3.23222900 | -0.60375200 | -1.57160300 |

### 15c

E= -998.7793158 a.u., number of negative frequencies = 0

1 1

|   |             |             |             |
|---|-------------|-------------|-------------|
| C | -3.18049300 | -0.61718500 | -0.07657700 |
| C | -2.67777500 | -1.09854900 | 1.16116300  |
| C | -1.52082900 | -1.81085100 | 1.18207800  |
| C | -0.73494000 | -1.94030200 | -0.04548800 |
| C | -1.46478100 | -1.77830900 | -1.30021200 |
| C | -2.62414800 | -1.07449300 | -1.30583400 |
| O | 0.19889600  | -2.96899500 | -0.03707300 |
| C | 1.48951600  | -2.48688200 | 0.11703000  |
| C | 1.42618000  | -1.00220300 | 0.19157700  |
| C | 0.18270700  | -0.56089000 | 0.06649700  |
| O | 2.43154700  | -3.19582500 | 0.16379500  |
| C | -4.28390900 | 0.36972600  | -0.09146000 |
| C | -0.39220300 | 0.78438900  | 0.04044000  |
| C | -0.64642000 | 1.46547300  | 1.23704800  |
| C | -1.18069800 | 2.74511600  | 1.20768800  |
| C | -1.46865700 | 3.35499900  | -0.01297800 |
| C | -1.20719600 | 2.68942100  | -1.20744000 |

|   |             |             |             |
|---|-------------|-------------|-------------|
| C | -0.67436300 | 1.40602400  | -1.18178000 |
| C | 2.68071300  | -0.19600200 | 0.37638100  |
| C | 3.35832500  | 0.17451700  | -0.95903200 |
| C | 3.93375400  | 1.55466500  | -0.63255400 |
| C | 2.84188700  | 2.12660900  | 0.26222700  |
| O | 2.38567100  | 1.01596700  | 1.04145500  |
| H | -3.21524700 | -0.87308100 | 2.07384000  |
| H | -1.07399600 | -2.18555800 | 2.09726400  |
| H | -0.98519400 | -2.13628700 | -2.20523500 |
| H | -3.13005200 | -0.83357000 | -2.23272400 |
| H | -4.91389100 | 0.29903500  | 0.79463200  |
| H | -3.80611500 | 1.36358400  | -0.08020600 |
| H | -4.88366900 | 0.30563700  | -0.99894100 |
| H | -0.39001300 | 0.99712100  | 2.17994100  |
| H | -1.36122400 | 3.27430700  | 2.13499000  |
| H | -1.88330600 | 4.35562300  | -0.03180600 |
| H | -1.41047000 | 3.17066100  | -2.15597900 |
| H | -0.46225100 | 0.88755100  | -2.11061100 |
| H | 3.35697200  | -0.79383200 | 0.99787700  |
| H | 4.10076200  | -0.56328300 | -1.25908100 |
| H | 2.60766100  | 0.25859000  | -1.75006400 |
| H | 4.11917600  | 2.15744600  | -1.52068100 |
| H | 4.86601300  | 1.45659500  | -0.07298000 |
| H | 3.18914400  | 2.89465300  | 0.95140900  |
| H | 2.00677500  | 2.52399700  | -0.32969900 |

### 16c

E= -998.7744831 a.u., number of negative frequencies = 0

1 1

|   |            |             |            |
|---|------------|-------------|------------|
| C | 3.75794700 | 0.74123500  | 0.27058500 |
| C | 4.25579600 | -0.59813500 | 0.19464700 |

|   |             |             |             |
|---|-------------|-------------|-------------|
| C | 3.35568600  | -1.57201400 | -0.09258200 |
| C | 1.96690400  | -1.23615000 | -0.47100900 |
| C | 1.47250500  | 0.11886700  | -0.15956900 |
| C | 2.43209900  | 1.09872900  | 0.09546000  |
| O | 1.09990800  | -2.30313000 | -0.23122900 |
| C | -0.24953100 | -2.11516000 | -0.11940600 |
| O | -0.93206900 | -3.06455500 | 0.08416100  |
| C | -0.77950600 | -0.71750200 | -0.25330000 |
| C | 0.05514000  | 0.36298600  | -0.20936400 |
| C | -2.28198600 | -0.57920100 | -0.24735200 |
| C | -0.43304700 | 1.76483000  | -0.11131400 |
| C | -1.20632900 | 2.14556800  | 0.98798800  |
| C | -1.64259400 | 3.45992800  | 1.10086900  |
| C | -1.31605800 | 4.39174300  | 0.12064000  |
| C | -0.55208400 | 4.01188100  | -0.97851800 |
| C | -0.10459800 | 2.70136800  | -1.09334300 |
| C | 5.70403100  | -0.87164600 | 0.48314600  |
| O | -2.68738300 | -0.91183900 | 1.07381300  |
| C | -3.66141900 | -1.96711900 | 1.02906700  |
| C | -4.28085000 | -1.86244900 | -0.35704600 |
| C | -3.07244200 | -1.47447400 | -1.22310400 |
| H | 4.46705600  | 1.52585400  | 0.52165000  |
| H | 3.62421800  | -2.62208600 | -0.14888400 |
| H | 2.09978800  | -1.12213700 | -1.58271800 |
| H | 2.12150200  | 2.12564100  | 0.23840000  |
| H | -2.53215000 | 0.46588900  | -0.43267900 |
| H | -1.47639000 | 1.40657300  | 1.73568300  |
| H | -2.24141800 | 3.75435600  | 1.95356400  |
| H | -1.66164400 | 5.41413400  | 0.21018500  |
| H | -0.30900100 | 4.73375900  | -1.74811500 |
| H | 0.48254700  | 2.40237500  | -1.95590200 |

|   |             |             |             |
|---|-------------|-------------|-------------|
| H | 6.33836600  | -0.38922100 | -0.26371800 |
| H | 5.97998400  | -0.47586100 | 1.46240900  |
| H | 5.91168400  | -1.94028400 | 0.47133600  |
| H | -4.36325200 | -1.78915100 | 1.84280900  |
| H | -3.16018500 | -2.92632900 | 1.17586700  |
| H | -4.74490100 | -2.79198000 | -0.68405000 |
| H | -5.03108000 | -1.06945100 | -0.37613400 |
| H | -3.35143800 | -0.92271400 | -2.11962200 |
| H | -2.51531900 | -2.36287200 | -1.51301800 |

### TS1-3c

E= -998.944915 a.u., im. freq.= 429.03i

0 2

|   |             |             |             |
|---|-------------|-------------|-------------|
| C | -5.56033700 | -0.58008400 | 0.23987800  |
| C | -4.82384300 | -1.62950100 | 0.78565600  |
| C | -3.43510900 | -1.63685100 | 0.73023100  |
| C | -2.77460600 | -0.57995800 | 0.12689600  |
| C | -3.47849100 | 0.48445400  | -0.42045400 |
| C | -4.86499500 | 0.47241600  | -0.35831900 |
| O | -1.38366900 | -0.60079100 | 0.17935100  |
| C | -0.66778900 | -0.34744100 | -0.95065200 |
| O | -1.14969800 | -0.12693000 | -2.02344200 |
| C | 0.74822600  | -0.31721700 | -0.63813100 |
| C | 1.86995400  | -0.75385000 | -0.41866800 |
| C | -7.06700300 | -0.58798700 | 0.26777600  |
| C | 0.81723800  | 1.97462400  | -0.74451300 |
| C | 3.23474700  | -1.02290000 | -0.15688500 |
| C | 4.19353300  | -0.89495900 | -1.17684900 |
| C | 5.52982500  | -1.14296500 | -0.90916700 |
| C | 5.93597300  | -1.51591900 | 0.37055300  |
| C | 4.99265200  | -1.64227000 | 1.38706200  |

|   |             |             |             |
|---|-------------|-------------|-------------|
| C | 3.65146700  | -1.40275300 | 1.13104200  |
| O | 2.13307900  | 2.18242000  | -0.52726700 |
| C | 2.31820800  | 2.36278900  | 0.88171600  |
| C | 1.05579200  | 3.09454000  | 1.33191300  |
| C | -0.01662200 | 2.48406100  | 0.40662000  |
| H | -5.34115000 | -2.45539400 | 1.26155800  |
| H | -2.85337100 | -2.44531600 | 1.15479000  |
| H | -2.94925700 | 1.29889100  | -0.89659100 |
| H | -5.41972000 | 1.30086700  | -0.78585700 |
| H | -7.44312300 | -1.24428600 | 1.05351400  |
| H | -7.46262600 | 0.41424600  | 0.44140800  |
| H | -7.46944200 | -0.94249100 | -0.68500500 |
| H | 0.52464300  | 2.01369600  | -1.78599000 |
| H | 3.87048200  | -0.59189300 | -2.16467400 |
| H | 6.26194800  | -1.04086600 | -1.70118600 |
| H | 6.98239700  | -1.70758400 | 0.57394100  |
| H | 5.30438700  | -1.93394400 | 2.38284400  |
| H | 2.91025800  | -1.50964200 | 1.91397600  |
| H | 3.24364500  | 2.91698600  | 1.02300200  |
| H | 2.40360200  | 1.37757000  | 1.35225200  |
| H | 0.84159000  | 2.94832100  | 2.38966100  |
| H | 1.15839100  | 4.16361100  | 1.13883600  |
| H | -0.75858000 | 3.21820600  | 0.08357200  |
| H | -0.55469100 | 1.67204700  | 0.90660500  |

### TS1-4c

E= -998.9422842 a.u., im. freq.= 398.37i

0 2

|   |             |             |             |
|---|-------------|-------------|-------------|
| C | -6.00195600 | 0.14336400  | 0.29596000  |
| C | -5.45055500 | -0.96908400 | -0.34082600 |
| C | -4.08031900 | -1.19253500 | -0.36684300 |

|   |             |             |             |
|---|-------------|-------------|-------------|
| C | -3.24056000 | -0.27821600 | 0.25821000  |
| C | -3.76106800 | 0.83334200  | 0.90400300  |
| C | -5.13498500 | 1.03679800  | 0.92231000  |
| O | -1.86733200 | -0.44950100 | 0.35404400  |
| C | -1.14697200 | -0.85519600 | -0.73419700 |
| O | -1.61714400 | -1.08949400 | -1.81434900 |
| C | 0.23700600  | -0.95560100 | -0.39059300 |
| C | 1.44564000  | -0.76365100 | -0.27931800 |
| C | -7.49026600 | 0.37990300  | 0.28286100  |
| C | 2.79621000  | -1.04154700 | 0.14337800  |
| C | 1.85237700  | 1.33104900  | -1.00186100 |
| C | 3.79695000  | -1.31702600 | -0.79509000 |
| C | 5.10338500  | -1.52001100 | -0.37461100 |
| C | 5.42701900  | -1.44117500 | 0.97818200  |
| C | 4.43370000  | -1.17563900 | 1.91584000  |
| C | 3.12172400  | -0.97768300 | 1.50398300  |
| C | 1.68623800  | 2.13979100  | 0.26226000  |
| C | 3.00672800  | 2.92954200  | 0.32035500  |
| C | 3.94910300  | 2.02918100  | -0.47388700 |
| O | 3.10816500  | 1.44731600  | -1.48578700 |
| H | -6.10774200 | -1.68125700 | -0.82866700 |
| H | -3.66896400 | -2.05505000 | -0.87065500 |
| H | -3.08017400 | 1.51853500  | 1.39344000  |
| H | -5.53777800 | 1.90493000  | 1.43285500  |
| H | -8.03859500 | -0.55979500 | 0.36900300  |
| H | -7.79353800 | 1.02840500  | 1.10591600  |
| H | -7.79871300 | 0.85871600  | -0.65055700 |
| H | 1.09982700  | 1.25767100  | -1.77648500 |
| H | 3.53961300  | -1.35244900 | -1.84587300 |
| H | 5.87426200  | -1.73562300 | -1.10453900 |
| H | 6.44966900  | -1.59543200 | 1.30066500  |



|   |            |             |             |
|---|------------|-------------|-------------|
| H | 4.67939000 | -1.12837200 | 2.96992500  |
| H | 2.33694900 | -0.78338600 | 2.22546400  |
| H | 0.80269900 | 2.77849200  | 0.22517500  |
| H | 1.58206800 | 1.48615300  | 1.13385800  |
| H | 3.35645800 | 3.10306200  | 1.33727900  |
| H | 2.89713300 | 3.89150400  | -0.18336700 |
| H | 4.75155600 | 2.55433400  | -0.98819400 |
| H | 4.36996500 | 1.22936000  | 0.14279600  |

### TS3c-5c

E= -998.9916989 a.u., im. freq.= 412.65i

0 2

|   |             |             |             |
|---|-------------|-------------|-------------|
| C | -3.25580100 | -1.28994400 | -0.03623700 |
| C | -2.54641000 | -1.51066400 | -1.22626200 |
| C | -1.21437700 | -1.86552700 | -1.21176200 |
| C | -0.53345000 | -1.90612700 | 0.02650400  |
| C | -1.27905300 | -1.90109000 | 1.22778100  |
| C | -2.61014400 | -1.54571800 | 1.18295200  |
| O | 0.75033600  | -2.42691600 | 0.05416400  |
| C | 1.81491400  | -1.56892000 | 0.07276200  |
| C | 1.42929600  | -0.12611200 | 0.05124400  |
| C | 0.14357100  | 0.13543800  | 0.06090800  |
| O | 2.92507500  | -2.00135700 | 0.11974000  |
| C | -4.66721000 | -0.77656400 | -0.06628700 |
| C | -0.84933500 | 1.14558400  | 0.03353900  |
| C | -1.34942000 | 1.61723700  | -1.19726800 |
| C | -2.39216900 | 2.52910100  | -1.22264500 |
| C | -2.96211300 | 2.98321400  | -0.03437800 |
| C | -2.47704600 | 2.52058900  | 1.18805600  |
| C | -1.43564100 | 1.60802000  | 1.22894700  |
| C | 2.54283800  | 0.89985100  | -0.02017600 |

|   |             |             |             |
|---|-------------|-------------|-------------|
| C | 3.50357000  | 0.87675700  | 1.18475800  |
| C | 4.85578700  | 1.15775300  | 0.52340900  |
| C | 4.68819900  | 0.43312900  | -0.80770200 |
| O | 3.33063800  | 0.66225000  | -1.18069400 |
| H | -3.06056500 | -1.40193800 | -2.17531300 |
| H | -0.65220700 | -2.04383000 | -2.12020100 |
| H | -0.76628400 | -2.10938500 | 2.15879100  |
| H | -3.17391600 | -1.46527500 | 2.10629500  |
| H | -4.66164500 | 0.31866600  | -0.05158700 |
| H | -5.18832200 | -1.09510700 | -0.97060000 |
| H | -5.23499400 | -1.11905100 | 0.80040700  |
| H | -0.90520400 | 1.25633700  | -2.11715000 |
| H | -2.76273300 | 2.89150800  | -2.17415700 |
| H | -3.77686000 | 3.69651600  | -0.06052700 |
| H | -2.91500300 | 2.87515800  | 2.11355000  |
| H | -1.06253100 | 1.23640600  | 2.17587000  |
| H | 2.07529700  | 1.88397300  | -0.12291000 |
| H | 3.22037400  | 1.61456500  | 1.93525500  |
| H | 3.51343400  | -0.11138300 | 1.64592800  |
| H | 5.70006000  | 0.78843200  | 1.10569400  |
| H | 4.98525300  | 2.22976500  | 0.35457200  |
| H | 5.32003500  | 0.82748400  | -1.60410000 |
| H | 4.86136900  | -0.64068900 | -0.69434900 |

### TS3c-6c

E= -998.9859561 a.u., im. freq.= 417.73i

0 2

|   |            |             |             |
|---|------------|-------------|-------------|
| C | 3.40702500 | -0.12153900 | 0.31589100  |
| C | 3.16893500 | -1.20735300 | 1.16728600  |
| C | 2.20413700 | -2.16994800 | 0.85739600  |
| C | 1.47539700 | -2.03794700 | -0.30193000 |

|   |             |             |             |
|---|-------------|-------------|-------------|
| C | 1.64320400  | -0.93080100 | -1.16060700 |
| C | 2.67214900  | -0.01308500 | -0.85679700 |
| O | 0.50046400  | -2.96033000 | -0.60382800 |
| C | -0.80562900 | -2.56638000 | -0.71107400 |
| O | -1.63354700 | -3.40144300 | -0.92028600 |
| C | -1.14549300 | -1.12260300 | -0.49824600 |
| C | -0.26144100 | -0.14832700 | -0.60096300 |
| C | 4.43141400  | 0.92607400  | 0.66661000  |
| C | -2.62362200 | -0.91729500 | -0.15171000 |
| C | -0.21099700 | 1.27975900  | -0.48014500 |
| C | 0.50910700  | 1.85513100  | 0.57972800  |
| C | 0.59551900  | 3.23600000  | 0.69740500  |
| C | -0.00622300 | 4.05886200  | -0.25028700 |
| C | -0.70153100 | 3.49301100  | -1.31802500 |
| C | -0.80440800 | 2.11612000  | -1.43924300 |
| C | -2.89529200 | -1.25021700 | 1.32121100  |
| C | -2.54997200 | 0.08375700  | 1.98785800  |
| C | -3.07511100 | 1.08845800  | 0.96052200  |
| O | -3.01820200 | 0.42918700  | -0.30856600 |
| H | 3.74833700  | -1.30848900 | 2.07780500  |
| H | 2.01353600  | -3.01561300 | 1.50600100  |
| H | 1.25857900  | -0.99557800 | -2.17275700 |
| H | 2.86246400  | 0.80879100  | -1.53802000 |
| H | 5.01677800  | 1.20978300  | -0.20967400 |
| H | 3.93837100  | 1.82916600  | 1.03859300  |
| H | 5.11647400  | 0.57120200  | 1.43709300  |
| H | -3.20922000 | -1.53561100 | -0.83279600 |
| H | 0.98462300  | 1.20597400  | 1.30760300  |
| H | 1.13564700  | 3.67114300  | 1.53005600  |
| H | 0.06560900  | 5.13580300  | -0.15900300 |
| H | -1.17526200 | 4.13133000  | -2.05426000 |

|   |             |             |             |
|---|-------------|-------------|-------------|
| H | -1.37243700 | 1.67027000  | -2.24554200 |
| H | -3.95544300 | -1.48152700 | 1.44881000  |
| H | -2.30944900 | -2.09513100 | 1.68266800  |
| H | -1.46700100 | 0.18254500  | 2.09808000  |
| H | -3.01088500 | 0.20894600  | 2.96731000  |
| H | -4.11722000 | 1.35609400  | 1.16030600  |
| H | -2.47623000 | 2.00153500  | 0.90988700  |

### TS5c-9c

E= -999.0002217 a.u., im. freq.= 228.09i

0 2

|   |             |             |             |
|---|-------------|-------------|-------------|
| C | -4.07084200 | -1.04079800 | -0.11935500 |
| C | -3.38727900 | -0.61810500 | -1.27334400 |
| C | -2.06478100 | -0.24933400 | -1.21814800 |
| C | -1.34268800 | -0.35218900 | -0.00201400 |
| C | -2.05617000 | -0.71087300 | 1.17132300  |
| C | -3.38760200 | -1.06218800 | 1.10191000  |
| O | -0.56197300 | -2.26338000 | -0.19186700 |
| C | 0.71622200  | -2.02932900 | -0.02201500 |
| C | 1.06361600  | -0.58758700 | 0.21056100  |
| C | 0.01969400  | 0.25325000  | 0.11278200  |
| O | 1.53209900  | -2.92554600 | -0.08682700 |
| C | -5.50467000 | -1.47660600 | -0.20753700 |
| C | 0.08154200  | 1.73367600  | 0.09303800  |
| C | 1.11664300  | 2.39734300  | -0.57878600 |
| C | 1.15138400  | 3.78599200  | -0.61102700 |
| C | 0.15983500  | 4.53006400  | 0.01886400  |
| C | -0.88071800 | 3.87904400  | 0.67360600  |
| C | -0.92661400 | 2.49203500  | 0.70063700  |
| C | 2.49307100  | -0.16207200 | 0.47442900  |
| C | 3.32639100  | -1.15632200 | 1.31285600  |

|   |             |             |             |
|---|-------------|-------------|-------------|
| C | 4.27713600  | -1.82376600 | 0.29564900  |
| C | 3.87244400  | -1.20823000 | -1.04950100 |
| O | 3.22246500  | 0.02137900  | -0.73392700 |
| H | -3.92143500 | -0.57434400 | -2.21609100 |
| H | -1.54307300 | 0.09308200  | -2.10408500 |
| H | -1.51960800 | -0.73862300 | 2.11283700  |
| H | -3.91321600 | -1.36505600 | 2.00033000  |
| H | -6.05739800 | -0.87034100 | -0.92709400 |
| H | -5.55839500 | -2.51669100 | -0.54310100 |
| H | -6.00081300 | -1.41224500 | 0.76110500  |
| H | 1.88079500  | 1.81955200  | -1.08635100 |
| H | 1.95459300  | 4.28684400  | -1.13792400 |
| H | 0.19151100  | 5.61270100  | -0.00843000 |
| H | -1.66119600 | 4.45238100  | 1.15915800  |
| H | -1.74752100 | 1.99194700  | 1.20264500  |
| H | 2.45508400  | 0.81406700  | 0.95983300  |
| H | 3.88863800  | -0.60106700 | 2.06391300  |
| H | 2.70072600  | -1.88536300 | 1.82325100  |
| H | 4.14982400  | -2.90457900 | 0.28152300  |
| H | 5.31608900  | -1.58978600 | 0.53148700  |
| H | 4.71861800  | -0.96583500 | -1.69220800 |
| H | 3.18636400  | -1.87027800 | -1.58339300 |

### TS9c-8c

E= -998.9980128 a.u., im. freq.= 329.36i

0 2

|   |             |             |             |
|---|-------------|-------------|-------------|
| C | -3.67903000 | 0.40055700  | -0.86943700 |
| C | -4.21962400 | -0.65607800 | -0.09747700 |
| C | -3.40066800 | -1.30701100 | 0.79469200  |
| C | -2.03125100 | -0.96430000 | 0.90235400  |
| C | -1.50726900 | 0.09654800  | 0.11889700  |

|   |             |             |             |
|---|-------------|-------------|-------------|
| C | -2.35437700 | 0.77906400  | -0.75555100 |
| O | -1.01768600 | -2.35439300 | -0.11584800 |
| C | 0.26499200  | -2.09276800 | -0.18394000 |
| O | 1.02832100  | -2.94173200 | -0.59635600 |
| C | 0.77635700  | -0.72436800 | 0.19579600  |
| C | -0.05870000 | 0.34143900  | 0.17402900  |
| C | 2.27050800  | -0.58589400 | 0.37782400  |
| C | 0.38654200  | 1.75821800  | 0.12902300  |
| C | -0.26884700 | 2.72032100  | 0.90462800  |
| C | 0.11860700  | 4.05261800  | 0.85204900  |
| C | 1.15268900  | 4.44342700  | 0.00727200  |
| C | 1.79794400  | 3.49627600  | -0.78089000 |
| C | 1.42060000  | 2.16002400  | -0.72399700 |
| C | -5.66996400 | -1.02188600 | -0.25624100 |
| O | 2.93082900  | -0.64105000 | -0.88976100 |
| C | 3.83618800  | -1.74172500 | -0.91279200 |
| C | 4.25236600  | -1.92673300 | 0.54171200  |
| C | 2.93397300  | -1.65219900 | 1.27621800  |
| H | -4.32442600 | 0.91628400  | -1.57285600 |
| H | -3.79436000 | -2.09793600 | 1.42191400  |
| H | -1.48010700 | -1.28025700 | 1.77876600  |
| H | -1.95503000 | 1.58093500  | -1.36536900 |
| H | 2.46558400  | 0.40320400  | 0.79876600  |
| H | -1.07978000 | 2.41593100  | 1.55737200  |
| H | -0.38807800 | 4.78618900  | 1.46753200  |
| H | 1.45097600  | 5.48395600  | -0.03987100 |
| H | 2.59711100  | 3.79759700  | -1.44733500 |
| H | 1.92275200  | 1.41910200  | -1.33682600 |
| H | -6.31148300 | -0.15428900 | -0.08560500 |
| H | -5.86229300 | -1.37982100 | -1.27065400 |
| H | -5.95843400 | -1.80716400 | 0.44194900  |

|   |            |             |             |
|---|------------|-------------|-------------|
| H | 4.66136300 | -1.47459800 | -1.57392100 |
| H | 3.32432000 | -2.62957200 | -1.29145400 |
| H | 4.65209700 | -2.92004800 | 0.74658300  |
| H | 5.00430200 | -1.18135400 | 0.81291100  |
| H | 3.08122200 | -1.27354700 | 2.28778500  |
| H | 2.33634800 | -2.56037100 | 1.32102300  |

### TS9c-11c

E= -998.9936092 a.u., im. freq.= 352.93i

0 2

|   |             |             |             |
|---|-------------|-------------|-------------|
| C | 3.74314300  | 0.03262600  | -1.03939500 |
| C | 4.31238900  | -0.86462800 | -0.13379500 |
| C | 3.49597700  | -1.40744500 | 0.85710500  |
| C | 2.14670900  | -1.08598300 | 0.93595200  |
| C | 1.58086900  | -0.20304800 | 0.01615800  |
| C | 2.40094600  | 0.37088100  | -0.95932900 |
| C | 0.15337200  | 0.21089600  | 0.09472400  |
| C | -0.90883300 | -0.58022700 | 0.14907600  |
| C | 5.76496500  | -1.24869400 | -0.23863100 |
| C | -0.09534000 | 1.69079700  | 0.09923400  |
| C | -0.85672100 | 2.29966300  | -0.89731100 |
| C | -1.07632100 | 3.67424900  | -0.87214600 |
| C | -0.53829200 | 4.44582600  | 0.15002200  |
| C | 0.23396300  | 3.84363800  | 1.14060000  |
| C | 0.46390200  | 2.47523900  | 1.11156600  |
| C | -2.36469300 | -0.34148300 | 0.45493800  |
| C | -0.80068200 | -2.38009100 | -0.32102300 |
| O | -1.40882900 | -2.54180800 | -1.32872200 |
| O | -0.15505000 | -2.82176200 | 0.58154100  |
| C | -3.25822500 | -0.09250500 | -0.77777000 |
| C | -4.56198300 | -0.78799500 | -0.37647500 |

|   |             |             |             |
|---|-------------|-------------|-------------|
| O | -2.90112500 | -1.47387000 | 1.12685700  |
| C | -4.03656700 | -1.97511100 | 0.41888700  |
| H | 4.36266400  | 0.47725400  | -1.81107600 |
| H | 3.92221700  | -2.09195100 | 1.58273700  |
| H | 1.52696800  | -1.51744800 | 1.71023500  |
| H | 1.97843700  | 1.08505200  | -1.65777100 |
| H | 6.16397800  | -1.55064400 | 0.73062100  |
| H | 5.88994900  | -2.08951400 | -0.92658200 |
| H | 6.36613100  | -0.41987200 | -0.61574300 |
| H | -1.25303200 | 1.69431700  | -1.70438900 |
| H | -1.66203500 | 4.14028400  | -1.65553000 |
| H | -0.71036800 | 5.51513000  | 0.17181700  |
| H | 0.66199800  | 4.44387900  | 1.93448600  |
| H | 1.07677900  | 2.00282400  | 1.87113400  |
| H | -2.40209900 | 0.51531400  | 1.13959400  |
| H | -3.37895100 | 0.97333700  | -0.96580800 |
| H | -2.82289000 | -0.56886200 | -1.65727200 |
| H | -5.16418800 | -1.08573900 | -1.23469800 |
| H | -5.16044200 | -0.13803300 | 0.26628500  |
| H | -4.73983900 | -2.35903300 | 1.15752100  |
| H | -3.72670100 | -2.78640800 | -0.24729400 |

### TS11c-12c

E= -1042.192092 a.u., im. freq.= 412.43i

0 3

|   |             |             |             |
|---|-------------|-------------|-------------|
| C | -1.74675900 | -3.02478300 | 0.19892400  |
| C | -3.11888200 | -2.98549100 | -0.04403900 |
| C | -3.67095400 | -1.76916200 | -0.44976300 |
| C | -2.88826000 | -0.63360600 | -0.59335500 |
| C | -1.50930800 | -0.66833600 | -0.33383000 |
| C | -0.95366900 | -1.89351000 | 0.05873600  |



|   |             |             |             |
|---|-------------|-------------|-------------|
| C | -0.66553500 | 0.53109600  | -0.55216500 |
| C | 0.64452500  | 0.43646700  | -0.83719900 |
| C | -3.98320700 | -4.20476200 | 0.14454500  |
| C | -1.23035800 | 1.89107600  | -0.35447800 |
| C | -0.76925900 | 2.97279400  | -1.11759300 |
| C | -1.23677700 | 4.25947300  | -0.89017900 |
| C | -2.17558500 | 4.49943600  | 0.10940100  |
| C | -2.63872400 | 3.43716200  | 0.87847200  |
| C | -2.17229400 | 2.14821800  | 0.65107200  |
| C | 1.66470800  | -0.42731700 | -1.45482200 |
| C | 1.74401500  | 1.01601100  | 1.15426800  |
| O | 3.06786000  | 0.72119800  | 1.15995100  |
| C | 3.31771800  | -0.38483700 | 2.04367400  |
| C | 2.93388600  | 0.33303500  | -1.93091600 |
| C | 4.09547600  | -0.61258600 | -1.56566100 |
| C | 1.94795000  | -0.90351300 | 2.48882100  |
| C | 1.03651800  | 0.31435200  | 2.26718300  |
| C | 3.36801200  | -1.89509000 | -1.15363700 |
| O | 2.15145400  | -1.45135200 | -0.57932100 |
| H | -1.28787800 | -3.95946800 | 0.50572100  |
| H | -4.73340100 | -1.71307600 | -0.66542500 |
| H | -3.34408900 | 0.29101000  | -0.92787300 |
| H | 0.11284700  | -1.95884400 | 0.23908900  |
| H | -3.39718900 | -5.12076200 | 0.05539700  |
| H | -4.44894600 | -4.20297700 | 1.13432200  |
| H | -4.78435900 | -4.23812100 | -0.59615700 |
| H | -0.04188400 | 2.78584500  | -1.90010200 |
| H | -0.87182100 | 5.07849000  | -1.49913500 |
| H | -2.54185400 | 5.50345000  | 0.28633300  |
| H | -3.36314200 | 3.61268800  | 1.66534500  |
| H | -2.53178800 | 1.32870200  | 1.26327000  |

|   |            |             |             |
|---|------------|-------------|-------------|
| H | 1.19137000 | -0.92440900 | -2.31684700 |
| H | 1.52553400 | 2.03378900  | 0.84758300  |
| H | 3.91018900 | -0.00262500 | 2.87929300  |
| H | 3.90254500 | -1.12596700 | 1.49814200  |
| H | 2.87291000 | 0.53200900  | -3.00099800 |
| H | 3.02236200 | 1.28310700  | -1.40616800 |
| H | 4.64813300 | -0.20703900 | -0.71809100 |
| H | 4.78924700 | -0.77840900 | -2.39005200 |
| H | 1.63692700 | -1.72333100 | 1.84398300  |
| H | 1.95614700 | -1.24304000 | 3.52403800  |
| H | 0.99858300 | 0.94741700  | 3.16401000  |
| H | 0.01104100 | 0.04682900  | 2.00304000  |
| H | 3.15998000 | -2.52662100 | -2.02846300 |
| H | 3.89460800 | -2.49417200 | -0.41004600 |

### TS11c-12cH

E= -1042.8479806 a.u., im. freq.= 1415.18i

0 2

|   |             |             |             |
|---|-------------|-------------|-------------|
| C | -3.27635200 | -1.83165400 | 0.86707700  |
| C | -4.42681200 | -1.27034500 | 0.31922900  |
| C | -4.28819000 | -0.12687900 | -0.47258700 |
| C | -3.04274900 | 0.43300600  | -0.70830000 |
| C | -1.88637300 | -0.14180400 | -0.16692800 |
| C | -2.02106600 | -1.27871300 | 0.63226100  |
| C | -0.54835500 | 0.45313500  | -0.44889200 |
| C | 0.52556700  | -0.28552300 | -0.72837300 |
| C | -5.78868500 | -1.86439400 | 0.56936700  |
| C | -0.41826100 | 1.93633500  | -0.38772200 |
| C | 0.40535300  | 2.61893400  | -1.28789200 |
| C | 0.60596000  | 3.98871900  | -1.16699400 |
| C | -0.02085200 | 4.69936100  | -0.14853600 |

|   |             |             |             |
|---|-------------|-------------|-------------|
| C | -0.86075100 | 4.03328000  | 0.73910200  |
| C | -1.06467000 | 2.66441000  | 0.61638200  |
| C | 0.70913400  | -1.75300100 | -0.85936900 |
| O | 3.72354300  | -0.39988400 | 0.02248500  |
| C | 3.68362800  | -0.76112600 | 1.41007200  |
| C | 1.80976200  | -2.18007800 | -1.86516800 |
| C | 2.62109800  | -3.24665000 | -1.10255200 |
| C | 2.64977100  | 0.15847100  | 2.05838200  |
| C | 2.73085200  | 1.40064700  | 1.16450900  |
| C | 1.73505400  | -3.53629300 | 0.10963900  |
| O | 1.11130900  | -2.29710100 | 0.40224500  |
| H | -3.36106100 | -2.71228900 | 1.49523600  |
| H | -5.17202800 | 0.32855000  | -0.90822300 |
| H | -2.95547900 | 1.32349200  | -1.32143300 |
| H | -1.13648300 | -1.72258300 | 1.07667100  |
| H | -6.45097400 | -1.13679300 | 1.04465300  |
| H | -6.25776000 | -2.17123500 | -0.36872800 |
| H | -5.72489300 | -2.73879200 | 1.21771800  |
| H | 0.88195200  | 2.06092300  | -2.08596100 |
| H | 1.24636200  | 4.50364200  | -1.87358000 |
| H | 0.13518800  | 5.76723800  | -0.05319200 |
| H | -1.35671100 | 4.58161300  | 1.53135900  |
| H | -1.71421000 | 2.14508800  | 1.31231800  |
| H | -0.24930600 | -2.21526400 | -1.14529600 |
| H | 4.68392500  | -0.60743300 | 1.82812200  |
| H | 3.41727900  | -1.81595600 | 1.48675400  |
| H | 1.35620100  | -2.57337400 | -2.77532000 |
| H | 2.43873700  | -1.33117500 | -2.13173900 |
| H | 3.56941900  | -2.81879500 | -0.77733600 |
| H | 2.81914400  | -4.14032000 | -1.69482800 |
| H | 1.65879000  | -0.29295600 | 1.97802700  |

|   |            |             |             |
|---|------------|-------------|-------------|
| H | 2.87092300 | 0.36170500  | 3.10600600  |
| H | 3.59240000 | 2.02042700  | 1.43516300  |
| H | 1.83237400 | 2.01837100  | 1.18958400  |
| H | 0.97220400 | -4.29014000 | -0.13093300 |
| H | 2.27851600 | -3.85866300 | 0.99840300  |
| C | 2.95492500 | 0.74941400  | -0.18579300 |
| H | 3.38595600 | 1.35875000  | -0.98151400 |
| H | 1.83277600 | 0.37634200  | -0.59126400 |
